# Supplementary material for: Air pollution, physical activity and ischaemic heart disease: a prospective cohort study of interaction effects
Source: PubMed Central journal article supplement (PMC8051414; doi:10.1136/bmjopen-2020-040912), 2021-04-13
Supplement: bmjopen-2020-040912.draft_revisions.pdf [file bmjopen-2020-040912.draft_revisions.pdf]

# BMJ Open

BMJ Open is committed to open peer review. As part of this commitment we make the peer review history of every article we publish publicly available.

When an article is published we post the peer reviewers' comments and the authors' responses online. We also post the versions of the paper that were used during peer review. These are the versions that the peer review comments apply to.

The versions of the paper that follow are the versions that were submitted during the peer review process. They are not the versions of record or the final published versions. They should not be cited or distributed as the published version of this manuscript.

BMJ Open is an open access journal and the full, final, typeset and author-corrected version of record of the manuscript is available on our site with no access controls, subscription charges or pay-per-view fees (<http://bmjopen.bmj.com>).

If you have any questions on BMJ Open's open peer review process please email [info.bmjopen@bmj.com](mailto:info.bmjopen@bmj.com)

# BMJ Open

## Air pollution, physical activity and ischemic heart disease - A prospective cohort study of interaction effects

|                               |                                                                                                                                                                                                                                                                                                                                                                                                                                                                         |
|-------------------------------|-------------------------------------------------------------------------------------------------------------------------------------------------------------------------------------------------------------------------------------------------------------------------------------------------------------------------------------------------------------------------------------------------------------------------------------------------------------------------|
| Journal:                      | <i>BMJ Open</i>                                                                                                                                                                                                                                                                                                                                                                                                                                                         |
| Manuscript ID                 | bmjopen-2020-040912                                                                                                                                                                                                                                                                                                                                                                                                                                                     |
| Article Type:                 | Original research                                                                                                                                                                                                                                                                                                                                                                                                                                                       |
| Date Submitted by the Author: | 25-May-2020                                                                                                                                                                                                                                                                                                                                                                                                                                                             |
| Complete List of Authors:     | Raza, Wasif; Umeå Universitet Medicinska fakulteten, Public Health and Clinical Medicine, Sustainable Health<br>Krachler, Benno; Umeå Universitet Medicinska fakulteten, Public Health and Clinical Medicine, Sustainable Health<br>Forsberg, Bertil; Umeå Universitet Medicinska fakulteten, Public Health and Clinical Medicine, Sustainable health<br>Sommar, Johan; Umeå Universitet Medicinska fakulteten, Public Health and Clinical Medicine, Sustainable health |
| Keywords:                     | Ischaemic heart disease < CARDIOLOGY, PUBLIC HEALTH, Coronary heart disease < CARDIOLOGY                                                                                                                                                                                                                                                                                                                                                                                |
|                               |                                                                                                                                                                                                                                                                                                                                                                                                                                                                         |

SCHOLARONE™  
Manuscripts

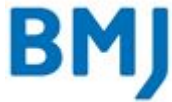

I, the Submitting Author has the right to grant and does grant on behalf of all authors of the Work (as defined in the below author licence), an exclusive licence and/or a non-exclusive licence for contributions from authors who are: i) UK Crown employees; ii) where BMJ has agreed a CC-BY licence shall apply, and/or iii) in accordance with the terms applicable for US Federal Government officers or employees acting as part of their official duties; on a worldwide, perpetual, irrevocable, royalty-free basis to BMJ Publishing Group Ltd ("BMJ") its licensees and where the relevant Journal is co-owned by BMJ to the co-owners of the Journal, to publish the Work in this journal and any other BMJ products and to exploit all rights, as set out in our [licence](#).

The Submitting Author accepts and understands that any supply made under these terms is made by BMJ to the Submitting Author unless you are acting as an employee on behalf of your employer or a postgraduate student of an affiliated institution which is paying any applicable article publishing charge ("APC") for Open Access articles. Where the Submitting Author wishes to make the Work available on an Open Access basis (and intends to pay the relevant APC), the terms of reuse of such Open Access shall be governed by a Creative Commons licence – details of these licences and which [Creative Commons](#) licence will apply to this Work are set out in our licence referred to above.

Other than as permitted in any relevant BMJ Author's Self Archiving Policies, I confirm this Work has not been accepted for publication elsewhere, is not being considered for publication elsewhere and does not duplicate material already published. I confirm all authors consent to publication of this Work and authorise the granting of this licence.

# Air pollution, physical activity and ischemic heart disease - A prospective cohort study of interaction effects

Wasif Raza <sup>1,\*</sup>, Benno Krachler <sup>1</sup>, Bertil Forsberg <sup>1</sup> and Johan Nilsson Sommar <sup>1</sup>

<sup>1</sup>Department of Public Health and Clinical Medicine, Section of Sustainable Health, Umeå University, Sweden; [wasif.raza@umu.se](mailto:wasif.raza@umu.se) (W.R.); [benno.krachler@umu.se](mailto:benno.krachler@umu.se) (B.K.); [bertil.forsberg@umu.se](mailto:bertil.forsberg@umu.se) (B.F.); [johan.sommar@umu.se](mailto:johan.sommar@umu.se) (J.N.S.)

\* Correspondence: [wasif.raza@umu.se](mailto:wasif.raza@umu.se) ; Tel.: +46-72-289-5144

For peer review only

30

## 31 Abstract

32 **Objective:** To assess a possible interaction effect between physical activity and air pollution on first  
33 incidence of ischemic heart disease (IHD).

34 **Design:** Prospective cohort study

35 **Setting:** Umeå, Northern Sweden

36 **Participants:** We studied 34,748 adult participants of Västerbotten Intervention Programme cohort  
37 from 1990 to January 2014. Annual particulate matter concentrations ( $PM_{2.5}$  and  $PM_{10}$ ) at the  
38 participants' residential addresses were modelled and a questionnaire on frequency of exercise and  
39 active commuting was completed at baseline. Cox proportional hazards modelling was used to estimate  
40 1) association with physical activity at different levels of air pollution, and 2) the association with  
41 particulate matter at different levels of physical activity.

42 **Outcome:** First incidence of IHD.

43 **Results:** Over a mean follow-up of 12.4 years, there were 1,148 IHD cases. Overall, we observed an  
44 increased risk of IHD among physically active individuals with higher concentrations of particles at their  
45 home address. Exercise at least twice a week was associated with a lower risk of IHD among participants  
46 with high residential  $PM_{2.5}$  (0.60; 95% CI: 0.44-0.82) and  $PM_{10}$  (0.55; 95% CI: 0.4-0.76). The same  
47 beneficial effect was not observed with low residential  $PM_{2.5}$  (0.94; 95% CI: 0.72-1.22) and  $PM_{10}$  (0.99;  
48 95% CI: 0.76-1.29). An increased risk associated with higher long-term exposure to particles was only  
49 observed among participants never exercising in training clothes and among those not performing any  
50 active commuting. However, only the interaction effect on hazard ratios for exercise was statistically  
51 significant.

52 **Conclusion:** Exercise was associated with a lower risk of first incidence of IHD among individuals with  
53 higher residential particle concentrations. An air pollution-associated risk was only observed among  
54 those who exercised less. The findings support the promotion of physical activity and a mitigation of air  
55 pollution.

56

57 **Key Words:** Air pollution,  $PM_{2.5}$ ,  $PM_{10}$ , exercise, interaction, ischemic heart disease

58

59

60

61

62

1  
2  
3 63  
4  
5 64  
6  
7  
8 65  
9 66  
10  
11 67  
12 68  
13 69  
14 70  
15 71  
16 72  
17 73  
18 74  
19 75  
20 76  
21 77  
22 78  
23 79  
24 80  
25 81  
26 82  
27 83  
28 84  
29 85  
30 86  
31 87  
32 88  
33 89  
34 90  
35 91  
36 92  
37 93  
38 94  
39 95  
40 96  
41 97  
42 98  
43 99  
44 100  
45 101  
46 102  
47 103  
48 104  
49  
50  
51  
52  
53  
54  
55  
56  
57  
58  
59  
60

## Strengths and limitations of this study

- This study simultaneously evaluated the impact of physical activity and air pollution and their interaction on first incident IHD cases in a population with relatively low level of air pollution concentrations.
- For air pollution exposure, this study used individual time varying exposures of annual mean concentrations during follow-up based on population address registries.
- Another strength is the prospective design and the availability of baseline data on several important confounders.
- No exposure-response assessment could be performed since the statistical power only allowed for the formation of two exposure categories.
- Differences in air pollution exposure during active commuting might cause possible bias estimates due to exposure misclassification.

105

106

## 1 Introduction

107

108

109 Cardiovascular disease (CVD) is the most important cause of morbidity and premature mortality  
110 worldwide, accounting for 422.3 million cases and 17.92 million deaths in 2015 [1]. There is solid  
111 evidence that inflammation is a key upstream pathogenic mechanism [2]. Ambient air pollution,  
112 generally comprising ozone, sulphur dioxide, nitrogen dioxide and particulate matter (PM), is a leading  
113 contributor to the global burden of disease and an important risk factor for morbidity and mortality.  
114 Particulate matter is often measured as PM<sub>2.5</sub>, to represent particles with a diameter of 2.5 micrometres  
115 or less, and PM<sub>10</sub>, to represent particles with a diameter of 10 micrometres or less. Ambient PM<sub>2.5</sub>  
116 exposure alone has been estimated to account for 4.2 million deaths in 2015, of which 1.5 million deaths  
117 were caused by ischemic heart diseases (IHD) [3]. The underlying mechanisms mediating the pathogenic  
118 impact of air pollution involve systemic oxidative stress and inflammation [4,5]. Physical activity is a  
119 salutogenic factor in numerous non-communicable chronic diseases (NCDs), with physical inactivity  
120 being responsible for 6% of the burden of disease from coronary heart disease [6,7]. The beneficial  
121 effects of physical activity include protection against low-grade inflammation by releasing anti-  
122 inflammatory substances, such as interleukin 6, from contracting muscles [8,9].

123

124 Rapid urbanization and increased use of motorized transport contribute to modern day problems such  
125 as traffic congestion, traffic related air pollution and lack of physical activity. Promotion of active  
126 transportation by changing mode of transport from car to cycling and walking are among the different  
127 strategies used to tackle these challenges [10–12]. As inflammation is a causative mechanism for  
128 cardiovascular disease, it is conceivable that the anti-inflammatory effects of physical activity may  
129 mitigate the harmful effects associated with exposure to air pollution. However, one major concern with  
130 physical activity in a polluted environment is the increased inhalation of particles due to an increase in  
131 respiratory volume that may counteract the beneficial effects of physical activity [13,14].

132

133 The long-term effects of air pollution among individuals with different levels of leisure time physical  
134 activity have been estimated within the Danish Diet, Cancer, and Health cohort. The incidence of  
135 diabetes was assessed in relation to leisure time physical activity and nitrogen dioxide (NO<sub>2</sub>)  
136 concentration at the home address. Residential NO<sub>2</sub> was found to be associated with increased  
137 incidence of diabetes, but only among physically active individuals [15]. As far as we know, only one  
138 study has examined the modifying effect of air pollution on the association between physical activity  
139 and cardiovascular disease. In their recent study, Kubesch and colleagues conclude that physical activity  
140 reduced the risk of first incidence of myocardial infarction (MI) and recurrent MI among individuals with  
141 high NO<sub>2</sub> concentration at the residential addresses [16]. As only one pollutant (NO<sub>2</sub>) and only one  
142 cardiovascular outcome (MI) have been studied, the knowledge of a possible interaction between air  
143 pollution and physical activity on CVD is inconclusive.

144 A Taiwanese study found an independent inverse association of habitual physical activity with  
145 inflammation across different levels of PM<sub>2.5</sub> exposure, although long term exposure was associated  
146 with increased inflammation at all levels of physical activity [17].

147 We therefore aimed to examine interaction effects between physical activity and long-term exposure to  
148 PM<sub>2.5</sub> and PM<sub>10</sub> at residential addresses on the incidence of ischemic heart disease (IHD). We wanted to

149

150

151

152

153

154

155

156

1  
2  
3 149 assess: 1) whether air pollution modifies the beneficial effects of physical activity on IHD, and 2)  
4 150 whether physical activity modifies the harmful effects of air pollution on IHD.

5 151  
6 152  
7 153  
8

## 10 154 2 Methods

11 155

13 156 To determine the interaction effect between air pollution and physical activity on IHD incidence, we  
14 157 combined cohort data which comprised risk factors for IHD, national registry data on IHD incidence from  
15 158 the Swedish National Board of Health and Welfare, and yearly annual mean air pollution particle  
16 159 concentrations at the individuals' residential addresses using dispersion models from the Swedish Clean  
17 160 Air and Climate Research Program (SCAC).

19 161

20 162 VIP (Västerbotten Intervention Programme) is a population based screening and prospective cohort  
21 163 study, developed to reduce the risk of future CVD and diabetes by promoting a healthy lifestyle among  
22 164 individuals living in the Västerbotten region. The SCAC developed methods to estimate exposure to  
23 165 source-specific particulate matter such as PM<sub>2.5</sub> and PM<sub>10</sub> and at residential addresses in Gothenburg,  
24 166 Stockholm and Umeå.

26 167

### 27 168 2.1 Study population

28 169

29 170 VIP is an ongoing population-based health investigation survey of all individuals at ages 40, 50 or 60  
30 171 years, depending upon risk factors, living in the Västerbotten region, who are invited to participate in  
31 172 systematic risk factor screening and individual counselling about healthy lifestyle habits. A detailed  
32 173 description of VIP has been presented elsewhere [18]. Between 1990 and 2014, a total of 42,488 of the  
33 174 VIP participants that lived in Umeå Municipality during the study period were included in the analysis.  
34 175 After exclusion of 7,740 participants with missing information on exercise, the study sample thus  
35 176 consisted of 34,748 individuals, 53% men and 47% women, 40-60 years of age at baseline examination,  
36 177 with no previous history of IHD at time of enrolment. After exclusion of individuals with missing  
37 178 information on included confounders the final number of included individuals were 31424 and 29218 for  
38 179 the analyses of exercise in training clothes and active commuting, respectively. All participants in the VIP  
39 180 gave their informed written consent, and the study was approved by the Regional Ethics Review Board  
40 181 at Umea University (DNR: 2014-136-32M and 2015/16-31Ö).

42 182

### 44 183 2.2 Leisure time exercise and active commuting

45 184

46 185 The VIP questionnaire includes various self-reported information on physical activity including frequency  
47 186 of leisure time physical activity and active commuting (cycling or walking to and from work). The  
48 187 association with IHD was assessed in relation to frequency of exercise in training clothes and amounts of  
49 188 active commuting. Exercise during the previous three months was categorized as never, rarely, once per  
50 189 week, 2-3 times per week or more than 3 times per week. Based on this information, participants were  
51 190 categorized as "Twice per week or more" if they exercised with a frequency of 2-3 times per week and  
52 191 more, "At most once a week" if they exercised rarely or once per week, and "Never" if no activity was  
53 192 performed. For active commuting, participants were asked about their mode of transport to work each  
54 193 season. Participants were classified in three categories: "Non- active commuting" if commuting every

56



194 season by car or bus, “At most two seasons out of four” if cycling or walking at most half a year and  
195 “More than two seasons out of four”, if cycling and walking more than half a year.

196  
197  
198

### 199 2.3 Covariates

200

201 The VIP questionnaire also gathered information on participants’ educational status, occupation,  
202 smoking, alcohol intake and economic status. Education was defined according to the International  
203 Standard Classification of Education (ISCED), United Nations Educational, Scientific and Cultural  
204 Organization (UNESCO) 1997. Participants were asked about the highest level education they had  
205 achieved with eight predefined categories ranging from “pre-school” to “university education.” Alcohol  
206 intake was assessed by the reported frequency of consumption with answering options that ranged  
207 from “Never” to “2-4 times/week.” Information on smoking was gathered by using the question, “How  
208 often do you smoke?” Information on occupational status was obtained with a question, “What kind of  
209 job do you have nowadays?” with the answering options of eight predefined categories. Finally,  
210 information on occupation status was asked with the question, “What is your current occupation?” with  
211 8 categories ranging from permanently employed to retired.

212

### 213 2.4 Air pollution concentrations

214  
215

216 Annual mean total concentrations of PM<sub>2.5</sub> and PM<sub>10</sub> for the years 1990-2011 (and thereafter linearly  
217 extrapolated up until year 2014) were obtained from the SCAC research program, described in detail  
218 elsewhere [19]. Briefly, concentrations of PM<sub>2.5</sub> and PM<sub>10</sub> were estimated within SCAC by applying  
219 dispersion models on local or regional emission inventories. These emission inventories contain detailed  
220 information on emissions from different source categories, such as road traffic exhaust, road traffic non-  
221 exhaust, domestic heating, shipping and industrial activities. For Umeå, inventories were validated  
222 through monitoring for consistency. Emissions from small-scale residential heating were assessed using  
223 registry data from chimney sweepers that included the type of wood stove or boiler. The addresses of  
224 these residences were geocoded using the geographical centre coordinate of the estate. Road traffic  
225 emission factors for PM exhaust for different vehicle types, speeds and driving conditions were  
226 calculated based on the Handbook Emission Factors for Road Transport (HBEFA) version 3.1 [20].  
227 Estimates for non-exhaust contribution from brake and tire wear were based on Omstedt et al. [21]. The  
228 annual average emission from shipping was used in the modelling on a 1x1 km<sup>2</sup> grid resolution. The  
229 emissions from other sources such as industrial processes, off-road machinery and agriculture was  
230 collected from Swedish Meteorological and Hydrological Institute (SMHI). To obtain annual average  
231 emissions of PM<sub>2.5</sub> and PM<sub>10</sub>, Gaussian models included in the Airviro air quality management system  
232 (SMHI, 2010) were used for simulation based on hourly meteorological data for 1990, 2000 and 2011  
233 [22]. The comparison between measured and modelled PM<sub>2.5</sub> and PM<sub>10</sub> agreed well at most monitoring  
234 stations ( $r^2=0.87$  and  $r^2=0.65$ , respectively).

235

### 236 2.5 Outcome

237

237 We linked the records in VIP and through the unique Swedish personal identification number with data  
238 on first IHD event cases from the National Patient Register and the Cause of Death Register, both at the  
239 National Board of Health and Welfare, using primary discharge diagnoses for IHD according to  
240 International Classification of Diseases, 10th revision (ICD-10): code I20-125.

241  
242

## 243 2.6 Participants and public involvement

244

245 There was no participants and public involvement in conducting or reporting our research.

## 246 2.7 Statistical Analysis

247

248 We performed survival analyses using Cox regression with age as underlying time scale to estimate  
249 hazard ratios (HRs), and 95% confidence intervals (CIs), to estimate 1) the association between first  
250 incident IHD and air pollution exposure at different levels of physical activity and 2) the association  
251 between first incident IHD and physical activity at different levels of air pollution exposure. Follow-up  
252 started at date of recruitment to the cohort and ended with the earliest of the date of first IHD case,  
253 emigration, death, or 31 December 2013. Interaction between physical activity and air pollution and  
254 their impact on IHD was studied by introducing an interaction term into the model. Residential annual  
255 mean particle concentrations were categorized as below or above the median concentration for PM<sub>2.5</sub>  
256 and PM<sub>10</sub>, respectively. Interaction with physical activity was assessed based on 1) the frequency of  
257 exercise in training clothes and 2) the number of seasons the individual walked or cycled to work. Active  
258 commuting by walking or cycling was categorized into three groups: non-active commuters, active  
259 commuters at most half of the year (up to two out of four seasons), active commuters more than half a  
260 year (more than two out of four seasons). Estimates were adjusted for: calendar year as a penalized  
261 cubic spline with 3 degrees of freedom, gender (male vs female), highest education level (compulsory,  
262 high school, university), alcohol intake (never, once/month or sometimes, 2-4 times/month, 2-3  
263 times/week, ≥4 times/week), smoking (previous non-regular smoker, non-regular smoker, cigarette  
264 smoker, cigar or pipe smoker), occupation (gainfully employed, unemployed, not gainfully employed,  
265 retired), and registry data on area level mean income. In the basic model we adjusted only for gender  
266 and exposure year. All analyses were performed using R version 3.4.2, and the statistical inference was  
267 conducted with a 5% significance level.

268

## 269 3 Results

270

271 The mean age at recruitment to this cohort was 45.8 years. Among the 34,748 participants 1,148 cases  
272 of IHD were identified during a mean follow-up time of 12.4 years. Table 1 summarizes characteristics of  
273 participants according to different levels of leisure time physical activity. Participants not reporting any  
274 leisure time exercise were older and more likely to be male, non-commuters and to belong to a lower  
275 socioeconomic group. Subjects performing moderate to high-level physical activity, were more likely to  
276 be women, non-smokers, and active commuters. The 5-year mean of PM<sub>10</sub> and PM<sub>2.5</sub> concentration  
277 were different between leisure time physical activity categories, with at most 7 and 6% difference  
278 respectively for PM<sub>10</sub> and PM<sub>2.5</sub>.

279

1  
2  
3 280  
4 281  
5 282  
6 283  
7 284  
8 285  
9 286  
10 287  
11 288  
12 289  
13 290  
14 291  
15 292  
16 293  
17 294

Table 1: Characteristics of participants at different levels of exercise in training clothes at baseline

| Characteristics                                   | Never        | At most once a week | Twice per week or more | p      |
|---------------------------------------------------|--------------|---------------------|------------------------|--------|
| Exercise in training clothes n (%)                | 13043 (37.5) | 14994 (43.2)        | 6711 (19.3)            |        |
| PM <sub>10</sub> , µg/m <sup>3</sup> (mean (SD))  | 10.93 (2.00) | 11.06 (1.96)        | 10.39 (1.94)           | <0.001 |
| PM <sub>2.5</sub> , µg/m <sup>3</sup> (mean (SD)) | 6.41 (1.12)  | 6.49 (1.12)         | 6.11 (1.11)            | <0.001 |
| Frequency of active commuting (%)                 |              |                     |                        | <0.001 |
| Non-active commuting                              | 6369 (48.8)  | 6409 (42.7)         | 2666 (39.7)            |        |
| At most two seasons of four                       | 1806 (13.8)  | 2547 (17.0)         | 1037 (15.5)            |        |
| More than two seasons of four                     | 3506 (26.9)  | 4976 (33.2)         | 2555 (38.1)            |        |
| Missing                                           | 1362 (10.4)  | 1062 (7.1)          | 453 (6.8)              |        |
| Alcohol intake (%)                                |              |                     |                        | <0.001 |
| Never                                             | 135 (1.0)    | 120 (0.8)           | 79 (1.2)               |        |
| Once/month or sometimes                           | 5337 (40.9)  | 5950 (39.7)         | 2790 (41.6)            |        |
| 2-4 times/month                                   | 2000 (15.3)  | 2436 (16.2)         | 1061 (15.8)            |        |
| 2-3 times/week                                    | 97 (0.7)     | 93 (0.6)            | 54 (0.8)               |        |
| ≥ 4 times/week                                    | 5068 (38.9)  | 5861 (39.1)         | 2265 (33.8)            |        |
| Missing                                           | 406 (3.1)    | 534 (3.6)           | 462 (6.9)              |        |
| Smoking (%)                                       |              |                     |                        | <0.001 |
| Never smoker                                      | 5139 (39.4)  | 7240 (48.3)         | 3467 (51.7)            |        |
| Previous non-regular smoker                       | 1072 (8.2)   | 1458 (9.7)          | 711 (10.6)             |        |
| Non-regular smoker                                | 581 (4.5)    | 807 (5.4)           | 348 (5.2)              |        |
| Previous regular smoker                           | 2729 (20.9)  | 2865 (19.1)         | 1201 (17.9)            |        |
| Cigarette smoker                                  | 2789 (21.4)  | 1805 (12.0)         | 426 (6.3)              |        |
| Cigar or pipe smoker                              | 186 (1.4)    | 130 (0.9)           | 45 (0.7)               |        |
| Missing                                           | 547 (4.2)    | 689 (4.6)           | 513 (7.6)              |        |
| Highest education level (%)                       |              |                     |                        | <0.001 |
| Compulsory                                        | 5534 (42.4)  | 4319 (28.8)         | 1369 (20.4)            |        |
| High                                              | 3573 (27.4)  | 4116 (27.5)         | 1951 (29.1)            |        |
| University                                        | 3449 (26.4)  | 5933 (39.6)         | 2911 (43.4)            |        |
| Missing                                           | 487 (3.7)    | 626 (4.2)           | 480 (7.2)              |        |
| Gender %, (men)                                   | 7072 (54.2)  | 8036 (53.6)         | 3274 (48.8)            | <0.001 |
| Age, y (mean (SD))                                | 47.28 (9.09) | 45.27 (9.02)        | 44.32 (8.61)           | <0.001 |
| Occupation (%)                                    | <0.001       |                     |                        |        |
| Gainfully employed                                | 10536 (80.8) | 12690 (84.6)        | 5452 (81.2)            |        |
| Unemployed                                        | 478 (3.7)    | 382 (2.5)           | 174 (2.6)              |        |

| Characteristics                         | Never                   | At most once a week     | Twice per week or more  | p      |
|-----------------------------------------|-------------------------|-------------------------|-------------------------|--------|
| Not gainfully employed                  | 318 ( 2.4)              | 352 ( 2.3)              | 160 ( 2.4)              |        |
| Retired                                 | 673 ( 5.2)              | 449 ( 3.0)              | 194 ( 2.9)              |        |
| Missing                                 | 1038 ( 8.0)             | 1121 ( 7.5)             | 731 (10.9)              |        |
| Mean income for the neighbourhood (SEK) | 128285.70<br>(23017.70) | 130332.22<br>(23875.04) | 130221.55<br>(24605.92) | <0.001 |

295  
296  
297

298 Compared with individuals who reported no exercise, those participants that exercised at least twice per  
299 week had a 24% lower risk of IHD (Table 2). The corresponding overall estimate associated with active  
300 commuting was a 13% reduced risk of IHD among individuals commuting more than two seasons per  
301 year.

302  
303  
304  
305  
306  
307  
308  
309

302 Allowing for an interaction between the frequency of exercise in training clothes and particle  
303 concentrations (PM<sub>10</sub> and PM<sub>2.5</sub>) at the home address, the average 24% risk reduction from exercising at  
304 least twice per week was found to be driven by an interaction between exercise and particle exposure  
305 with 45% and 40% risk reduction among individuals with high PM<sub>10</sub> and PM<sub>2.5</sub> concentrations,  
306 respectively (table 2). The interaction coefficients estimating the additional benefit of exercise among  
307 individuals with a high exposure to particles at their home address were a 3% increased and a 44%  
308 reduced risk among those with high PM<sub>10</sub> concentrations and 0% and 36% risk reductions among those  
309 with high PM<sub>2.5</sub> concentrations.

310  
311  
312  
313  
314  
315  
316

310 For active commuters with low particle exposure at their home address, the risk of incident IHD was 17%  
311 and 18% higher among those commuting one or two seasons per year and 7% and 3% lower among  
312 those commuting at least two seasons per year, for PM<sub>10</sub> and PM<sub>2.5</sub> respectively. The benefit of active  
313 commuting was larger among individuals with a high particle concentration at their home address: risk  
314 reductions for active commuting during one or two seasons were 12% and 13% and for more than two  
315 seasons 18% and 21% respectively, compared with non-active commuters. No statistically significant  
316 interaction was found between active commuting and particle concentrations at the home address.

317  
318  
319  
320  
321  
322  
323  
324  
325  
326  
327  
328  
329  
330  
331  
332  
333  
334  
335

1  
2  
3 336  
4 337  
5 338  
6 339  
7 340  
8 341  
9 342  
10 343  
11 344  
12 345  
13 346  
14 347  
15 348  
16 349  
17 350  
18 351  
19 352

Table 2: Hazard ratios (95% CI) for IHD associated with different exercise and commuting habits among persons with different air pollution exposure at home addresses.

| Exercise in training clothes | Overall model with no interaction effects | Adjusted <sup>a</sup> HRs in categories of high and low particle exposure |                                     | Adjusted <sup>a</sup> interaction hazard ratio |
|------------------------------|-------------------------------------------|---------------------------------------------------------------------------|-------------------------------------|------------------------------------------------|
|                              |                                           | Low PM <sub>10</sub> <sup>b</sup>                                         | High PM <sub>10</sub> <sup>b</sup>  |                                                |
| Never                        | 1                                         | 1                                                                         | 1                                   |                                                |
| ≤ once/week                  | 1.03 (0.90-1.16)                          | 1.01 (0.84-1.21)                                                          | 1.04 (0.88-1.23)                    | 1.03 (0.81-1.32)                               |
| ≥ twice/week                 | 0.76 (0.62-0.93)                          | 0.99 (0.76-1.29)                                                          | 0.55 (0.40-0.76)                    | 0.56 (0.37-0.84)                               |
|                              |                                           | Low PM <sub>2.5</sub> <sup>c</sup>                                        | High PM <sub>2.5</sub> <sup>c</sup> |                                                |
| Never                        |                                           | 1                                                                         | 1                                   |                                                |
| ≤ once/week                  |                                           | 1.03 (0.86-1.23)                                                          | 1.03 (0.87-1.22)                    | 1.00 (0.78-1.28)                               |
| ≥ twice/week                 |                                           | 0.94 (0.72-1.22)                                                          | 0.60 (0.44-0.82)                    | 0.64 (0.43-0.96)                               |
| Active commuting per season  |                                           | Low PM <sub>10</sub> <sup>b</sup>                                         | High PM <sub>10</sub> <sup>b</sup>  |                                                |
| Non-active commuting         | 1                                         | 1                                                                         | 1                                   |                                                |
| ≤ two season of four         | 1.01 (0.86-1.19)                          | 1.17 (0.93-1.47)                                                          | 0.88 (0.70-1.11)                    | 0.76 (0.55-1.04)                               |
| > two seasons of four        | 0.87 (0.76-0.998)                         | 0.93 (0.76-1.14)                                                          | 0.82 (0.68-0.98)                    | 0.88 (0.67-1.15)                               |
|                              |                                           | Low PM <sub>2.5</sub> <sup>c</sup>                                        | High PM <sub>2.5</sub> <sup>c</sup> |                                                |
| Non-active commuting         |                                           | 1                                                                         | 1                                   |                                                |
| ≤ two season of four         |                                           | 1.18 (0.94-1.49)                                                          | 0.87 (0.69-1.10)                    | 0.73 (0.53-1.01)                               |
| > two seasons of four        |                                           | 0.97 (0.80-1.19)                                                          | 0.79 (0.65-0.95)                    | 0.81 (0.62-1.06)                               |

353 <sup>a</sup>Adjusted for sex, exposure year, education, smoking, alcohol intake, occupation, mean income, leisure time physical activity, and active commuting

354 <sup>b</sup>Low PM<sub>10</sub>: ≤9.6 µg/m<sup>3</sup>; High PM<sub>10</sub>: >9.6 µg/m<sup>3</sup>

355 <sup>c</sup>Low PM<sub>2.5</sub> ≤5.7 µg/m<sup>3</sup>; High PM<sub>2.5</sub>: >5.7 µg/m<sup>3</sup>

356

357

358 Individuals exposed to high concentrations of PM<sub>10</sub> and PM<sub>2.5</sub> at their home address had a 14% and 1%  
359 increased risk of incident IHD respectively, compared to individuals with low concentrations (Table 3).  
360 These increased risks were, however, not statistically significant.

When including an interaction between particle concentrations and exercise, risk estimates showed a positive association between air pollution and IHD among individuals performing no exercise and those exercising no more than once a week, whereas a negative association was found among those exercising more than twice a week (Table 3). For PM<sub>10</sub> concentrations, an increased risk of 21% and 25% was observed among those who did not exercise or exercised at most once a week, respectively, whereas a decreased risk of 32% was estimated among those that exercised at least twice a week. Similarly, for PM<sub>2.5</sub>, the risk of IHD increased by 16% among both those who did not exercise and those who exercised at most once a week, and decreased by 26% among those who exercised at least twice a week. The air pollution-associated risk was lower among those who exercised at least twice a week.

For active commuting, the highest air pollution-associated risk was found among those who did not perform any such activity, among whom the risks increased by a statistically significantly 26% and 24%, respectively (table 3). The risks were, however, not statistically significantly different from air pollution-associated risks among the active commuters (as presented in table 2).

Compared with individuals with low residential particle concentration, a high concentration of PM<sub>10</sub> was associated with 21% and 25% increased risk for IHD for those who never exercised in training clothes and those who exercised at most once a week, respectively, and showed a 32% decreased risk for those exercising at least twice a week; only the association for those exercising at most once a week was statistically significant. The corresponding estimates associated with PM<sub>2.5</sub> are increased risk of IHD of 16% for those never exercising and those who exercised at most once a week, and a decreased risk of 26% among those exercising at least twice a week (Table 3); none of these associations was statistically significant.

IHD risk associated with high residential PM<sub>10</sub> and PM<sub>2.5</sub> compared with low residential particle concentration was found to be 26% and 24% higher, respectively, among those never actively commuting; both these results were statistically significant. Among those actively commuting one or two seasons per year, IHD risk was 5% and 9% lower, respectively, while among those actively commuting more than two seasons out of four, the risk was 10% and 1% higher, respectively; none of these associations was significant. Overall, no statistically significant modifying effect of exercise and active commuting on the association between high particle concentration at home addresses and IHD was observed (Table3).

Table 3: Hazard ratios (95% CI) for IHD associated with high air pollution levels (vs low) at home address among persons with different exercise/commuting habits.

|                                     | Overall model with<br>No interaction effects | Adjusted <sup>a</sup> HRs in different exercise categories |                      |                       |
|-------------------------------------|----------------------------------------------|------------------------------------------------------------|----------------------|-----------------------|
|                                     |                                              | Exercise in training clothes                               |                      |                       |
|                                     |                                              | Never                                                      | ≤ once/week          | ≥ twice/week          |
| Low PM <sub>10</sub> <sup>b</sup>   | 1                                            | 1                                                          | 1                    | 1                     |
| High PM <sub>10</sub> <sup>b</sup>  | 1.14 (0.9-1.45)                              | 1.21 (0.97-1.49)                                           | 1.25 (1.01-1.54)     | 0.68 (0.46-0.998)     |
| Low PM <sub>2.5</sub> <sup>c</sup>  | 1                                            | 1                                                          | 1                    | 1                     |
| High PM <sub>2.5</sub> <sup>c</sup> | 1.01 (0.8-1.28)                              | 1.16 (0.94-1.44)                                           | 1.16 (0.95-1.43)     | 0.74 (0.51-1.09)      |
|                                     |                                              | Active commuting                                           |                      |                       |
|                                     |                                              | Non-active commuting                                       | ≤ two season of four | > two seasons of four |
| Low PM <sub>10</sub> <sup>c</sup>   |                                              | 1                                                          | 1                    | 1                     |
| High PM <sub>10</sub> <sup>c</sup>  |                                              | 1.26 (1.03-1.54)                                           | 0.95 (0.7-1.29)      | 1.10 (0.86-1.41)      |
| Low PM <sub>2.5</sub> <sup>d</sup>  |                                              | 1                                                          | 1                    | 1                     |
| High PM <sub>2.5</sub> <sup>d</sup> |                                              | 1.24 (1.02-1.51)                                           | 0.91 (0.67-1.24)     | 1.01 (0.79-1.29)      |

<sup>a</sup>Adjusted for sex, exposure year, education, smoking, alcohol intake, occupation, mean income, leisure time physical activity, active commuting

<sup>b</sup>Low PM<sub>10</sub>: ≤9.6 µg/m<sup>3</sup>; High PM<sub>10</sub>: >9.6 µg/m<sup>3</sup>

394 †Low PM<sub>2.5</sub> ≤5.7 µg/m<sup>3</sup>; High PM<sub>2.5</sub>: >5.7 µg/m<sup>3</sup>

## 4 Discussion

Overall, we found increased risk of first incident IHD associated with air pollution at the home address but a protective effect of physical activity. A statistically significant beneficial effect of exercise was found among individuals with both high PM<sub>10</sub> and PM<sub>2.5</sub>, but not among individuals with low levels. Also, for active commuting the benefits were greater among individuals with high residential particle concentrations, but these differences were not statistically significant. Air pollution concentration-associated risks were found among individuals who exercise at most once a week but not among individuals exercising at least twice a week. Statistically significantly increased risks were also found among non-active commuters. These risks were, however, not statistically significantly different from air pollution-associated risks among the active commuters.

Our findings are in accordance with a longitudinal cohort study on MI within the Danish Diet, Cancer, and Health cohort which found an increased benefit of participation in sports among individuals with high NO<sub>2</sub> concentration at the home addresses [16]. The reported risk reduction was 9, 15, and 24% respectively among individuals with low (<14.3 µg/m<sup>3</sup>), medium (14.3-21 µg/ m<sup>3</sup>) and high (>21 µg/ m<sup>3</sup>) residential NO<sub>2</sub> concentration. For walking and cycling they also estimated greater risk reductions for first incident MI among individuals with higher air pollution concentrations. In the same Danish cohort, the long term benefits of physical activity on CVD mortality were also found to be greater among individuals with high residential NO<sub>2</sub> [23]. The risk reduction associated with participation in cycling and gardening among individuals exposed to high residential NO<sub>2</sub> (≥ 19 µg/m<sup>3</sup>) was greater than those exposed to moderate/low NO<sub>2</sub> concentration (<19 µg/m<sup>3</sup>). Among participants exposed to high NO<sub>2</sub>, the risk reduction for cycling and gardening was 30% and 23%, respectively, whereas among participants exposed to low NO<sub>2</sub>, risk reduction was 17% and 15%, respectively. However, the interaction effects in these two studies were not statistically significant.

Opposite findings were observed for the modifying effect of physical activity on the association between air pollution and the incidence of diabetes [15]. Among the participants in the Danish cohort, the risk of developing diabetes increased by 10% per interquartile range of 4.9 mg/m<sup>3</sup> residential NO<sub>2</sub> among physically active individuals, but there was no difference among less physically active individuals. The authors considered that this may be due to an additive rather multiplicative interaction, thus resulting in an increased risk estimate only among physical active individuals with a low risk of developing diabetes.

As inflammation is a causative mechanism for cardiovascular disease, we hypothesized that the anti-inflammatory effects of physical activity may reduce air pollution-associated risks since inflammation is one among several different pathways for the harmful health effects of air pollution. The findings of

greater benefits of physical activity among individuals with higher air pollution exposure for incident IHD risk in our study and incident MI and CVD mortality in the Danish cohort, support such a hypothesis. However, a study on physical activity and white blood cell counts conducted in a large cohort of Taiwanese adults suggested no effect modification by residential air pollution measured as PM<sub>2.5</sub> [17]. Both physical activity and residential air pollution were, however, found to be associated with an inflammatory response assessed by white blood cell counts. However, the association between physical activity and white blood cell count is variable because exercise also causes a transient increase in white blood cell count which usually normalises within 24 hours [24]. The results of our study cannot be directly compared with the above mentioned studies due to the difference in pollutants [15,16,23] and health outcomes [15,16,23]. This study contributes with air pollution effect estimates on IHD incidence in a population with a relatively low level of air pollution concentrations. Compared with the previous cohort studies on interaction effects between air pollution and physical activity, the annual mean PM<sub>2.5</sub> concentration was 3-4 times lower. The annual mean in the Taiwanese cohort was 27 µg/m<sup>3</sup> and a recent study within the same population as the DHC-cohort studies reported 18 µg/m<sup>3</sup>. Even at these lower levels of air pollution an increased risk associated with air pollution exposure was found, however not among those who exercised at least twice a week. A major strength of our study is the air pollution particle concentration exposure data since particles are considered to be the causal component of air pollution [25]. The study used individual time varying exposures of annual mean concentrations during follow-up based on population address registries. The dispersion model used for modelling of particle concentrations has previously been validated [19]. Within the DHC studies NO<sub>2</sub> was used as a proxy for traffic generated air pollution and was assessed only at residential addresses at the year of recruitment or as an annual mean during follow-up. A limitation of our exposure data is that the statistical power only allowed for two exposure categories and therefore no exposure-response assessment was performed.

Another strength of our study is the prospective design, the long follow-up period, the large cohort size and the availability of baseline data on several important confounders. A limitation is the lack of information on the intensity and duration of physical activity and therefore only frequency of exercise could be considered. The study also lacked information on changes in physical activity and other life-style factors during follow-up.

There is a risk of reverse causation if individuals at their baseline examination had a low physical activity level due to poorer health. Furthermore, we lacked information on whether exercise is taking place outdoors or indoors. For active commuters we also lack air pollution exposure calculations during the commute. This would cause exposure misclassification among active commuters with a higher in-traffic air pollution exposure dose compared with non-active commuters, causing a possible bias to the null. This would also occur if individuals chose not to exercise outside during times with high air pollution exposure.

477

## 5 Conclusion

The study estimated that exercise reduced the risk of first incident IHD, but only among individuals with higher residential particle concentrations (above median). Similarly, the harmful air pollution effect on IHD was only found among those who exercised less. Our results reinforce the public health message that physical activity is beneficial for cardiovascular health and thus support the adoption of strategies to improve health through promotion of physical activity and mitigation of air pollution. Further studies



1  
2  
3 484 are needed to build on the evidence of physical activity and air pollution interactions on the incidence  
4 485 cardiovascular disease. Air pollution exposures during commuting should also be considered in these  
5 486 studies.  
6

7 487

8 488

9 489

10  
11  
12  
13 490 **Author's contributions:** All the authors contributed to the study conception and design. W.R. and J.N.S.  
14 491 analysed the data. W.R wrote the first draft of the manuscript. All authors critically revised the  
15 492 manuscript for important intellectual content and read and approved the final version of the  
16 493 manuscript.  
17

18 494 **Funding:** The study was funded by FORTE (Forskningsrådet för hälsa, arbetsliv och välfärd) [grant number  
19 495 2012-1296], a Swedish state agency that finances scientific research in health, welfare, and working life,  
20 496 and also by grants from the Swedish state under the agreement between the Swedish government and  
21 497 the county councils (ALF) awarded B F.  
22

23 498 **Competing interests:** None.  
24

25 499 **Participants consent:** Obtained.  
26

27 500 **Ethics approval:** The study was approved by the Regional Ethics Review Board at Umea University (DNR:  
28 501 2014-136-32M and 2015/16-31Ö).  
29 502  
30

31 503  
32

33 504  
34  
35  
36  
37  
38  
39  
40  
41  
42  
43  
44  
45  
46  
47  
48  
49  
50  
51  
52  
53  
54  
55  
56  
57  
58  
59  
60

1  
2  
3 506  
4  
56 507 **6 References**7  
8 508  
9

- 10 509 1 Lelieveld J, Klingmüller K, Pozzer A, *et al.* Cardiovascular disease burden from ambient air  
11 510 pollution in Europe reassessed using novel hazard ratio functions. *Eur Heart J* Published Online  
12 511 First: 2019. doi:10.1093/eurheartj/ehz135
- 14 512 2 Shrivastava AK, Singh HV, Raizada A, *et al.* C-reactive protein, inflammation and coronary heart  
15 513 disease. *Egypt. Hear. J.* 2015. doi:10.1016/j.ehj.2014.11.005
- 17 514 3 Cohen AJ, Brauer M, Burnett R, *et al.* Estimates and 25-year trends of the global burden of  
18 515 disease attributable to ambient air pollution: an analysis of data from the Global Burden of  
19 516 Diseases Study 2015. *Lancet* Published Online First: 2017. doi:10.1016/S0140-6736(17)30505-6
- 21 517 4 Münzel T, Gori T, Al-Kindi S, *et al.* Effects of gaseous and solid constituents of air pollution on  
22 518 endothelial function. *Eur. Heart J.* 2018. doi:10.1093/eurheartj/ehy481
- 24 519 5 Brook RD, Rajagopalan S, Pope CA, *et al.* Particulate matter air pollution and cardiovascular  
25 520 disease: An update to the scientific statement from the American Heart Association. *Circulation*  
26 521 Published Online First: 2010. doi:10.1161/CIR.0b013e3181d8e1
- 28 522 6 Stevens G. Global Health Risks: Mortality and burden of disease attributable to selected major  
29 523 risks. *World Heal. Organ.* 2009;**87**:646–646. doi:10.2471/BLT.09.070565
- 31 524 7 Lee I, Shiroma EJ, Lobelo F, *et al.* Impact of Physical Inactivity on the World's Major Non-  
32 525 Communicable Diseases. *Lancet* Published Online First: 2012. doi:10.1016/S0140-6736(12)61031-  
33 526 9
- 35 527 8 Nimmo MA, Leggate M, Viana JL, *et al.* The effect of physical activity on mediators of  
36 528 inflammation. *Diabetes, Obes. Metab.* 2013. doi:10.1111/dom.12156
- 38 529 9 Petersen AMW, Pedersen BK. The anti-inflammatory effect of exercise. *J Appl Physiol* Published  
39 530 Online First: 2005. doi:10.1152/jappphysiol.00164.2004
- 41 531 10 Rajé F, Tight M, Pope FD. Traffic pollution: A search for solutions for a city like Nairobi. *Cities*  
42 532 Published Online First: 2018. doi:10.1016/j.cities.2018.05.008
- 44 533 11 Rojas-Rueda D, De Nazelle A, Teixidó O, *et al.* Health impact assessment of increasing public  
45 534 transport and cycling use in Barcelona: a morbidity and burden of disease approach. *Prev Med*  
46 535 (*Baltim*) 2013;**57**:573–9.
- 48 536 12 Maizlish N, Woodcock J, Co S, *et al.* Health cobenefits and transportation-related reductions in  
49 537 greenhouse gas emissions in the San Francisco Bay area. *Am J Public Health* 2013;**103**:703–9.
- 51 538 13 Tainio M, de Nazelle AJ, Götschi T, *et al.* Can air pollution negate the health benefits of cycling  
52 539 and walking? *Prev Med (Baltim)* Published Online First: 2015. doi:10.1016/j.ypped.2016.02.002
- 54 540 14 Giles L V., Koehle MS. The health effects of exercising in air pollution. *Sport. Med.* 2014.  
55 541 doi:10.1007/s40279-013-0108-z

- 1  
2  
3 542 15 Andersen ZJ, Raaschou-Nielsen O, Ketznel M, *et al.* Diabetes incidence and long-term exposure to  
4 543 air pollution: A cohort study. *Diabetes Care* Published Online First: 2012. doi:10.2337/dc11-1155  
5  
6 544 16 Kubesch NJ, Jørgensen JT, Hoffmann B, *et al.* Effects of leisure-time and transport-related  
7 545 physical activities on the risk of incident and recurrent myocardial infarction and interaction with  
8 546 traffic-related air pollution: A cohort study. *J Am Heart Assoc* Published Online First: 2018.  
9 547 doi:10.1161/JAHA.118.009554  
10  
11 548 17 Zhang Z, Hoek G, Chang L yun, *et al.* Particulate matter air pollution, physical activity and  
12 549 systemic inflammation in Taiwanese adults. *Int J Hyg Environ Health* Published Online First: 2018.  
13 550 doi:10.1016/j.ijheh.2017.10.001  
14  
15 551 18 Norberg M, Wall S, Boman K, *et al.* The Västerbotten Intervention Programme: background,  
16 552 design and implications. *Glob Health Action* Published Online First: 2010.  
17 553 doi:10.3402/gha.v3i0.4643  
18  
19 554 19 Segersson D, Eneroth K, Gidhagen L, *et al.* Health impact of PM10, PM2.5 and black carbon  
20 555 exposure due to different source sectors in Stockholm, Gothenburg and Umea, Sweden. *Int J*  
21 556 *Environ Res Public Health* Published Online First: 2017. doi:10.3390/ijerph14070742  
22  
23 557 20 Hausberger S, Rexeis M, Zallinger M, *et al.* Emission Factors from the Model PHEM for the HBEFA  
24 558 Version 3. 2009.  
25  
26 559 21 Omstedt G, Bringfelt B, Johansson C. A model for vehicle-induced non-tailpipe emissions of  
27 560 particles along Swedish roads. *Atmos Environ* Published Online First: 2005.  
28 561 doi:10.1016/j.atmosenv.2005.06.037  
29  
30 562 22 SMHI. Airviro technical specification, appendix E. 2010.  
31 563 <http://www.smhi.se/airviro/2.867/specification/>  
32  
33 564 23 Andersen ZJ, de Nazelle A, Mendez MA, *et al.* A study of the combined effects of physical activity  
34 565 and air pollution on mortality in elderly urban residents: The Danish Diet, Cancer, and Health  
35 566 Cohort. *Environ Health Perspect* 2015.  
36  
37 567 24 Abramson N, Melton B. Leukocytosis: Basics of clinical assessment. *Am. Fam. Physician.* 2000.  
38  
39 568 25 World Health Organization. Review of evidence on health aspects of air pollution – REVIHAAP  
40 569 Project: Technical Report. 2013. doi:10.1007/BF00379640  
41  
42 570  
43  
44 571  
45  
46  
47  
48  
49  
50  
51  
52  
53  
54  
55  
56  
57  
58  
59

**STROBE 2007 (v4) Statement—Checklist of items that should be included in reports of *cohort studies***

| Section/Topic                | Item # | Recommendation                                                                                                                                                                       | Reported on page # |
|------------------------------|--------|--------------------------------------------------------------------------------------------------------------------------------------------------------------------------------------|--------------------|
| <b>Title and abstract</b>    | 1      | (a) Indicate the study's design with a commonly used term in the title or the abstract                                                                                               | 1                  |
|                              |        | (b) Provide in the abstract an informative and balanced summary of what was done and what was found                                                                                  | 2                  |
| <b>Introduction</b>          |        |                                                                                                                                                                                      |                    |
| Background/rationale         | 2      | Explain the scientific background and rationale for the investigation being reported                                                                                                 | 4                  |
| Objectives                   | 3      | State specific objectives, including any prespecified hypotheses                                                                                                                     | 4                  |
| <b>Methods</b>               |        |                                                                                                                                                                                      |                    |
| Study design                 | 4      | Present key elements of study design early in the paper                                                                                                                              | 5                  |
| Setting                      | 5      | Describe the setting, locations, and relevant dates, including periods of recruitment, exposure, follow-up, and data collection                                                      | 5                  |
| Participants                 | 6      | (a) Give the eligibility criteria, and the sources and methods of selection of participants. Describe methods of follow-up                                                           | 5                  |
|                              |        | (b) For matched studies, give matching criteria and number of exposed and unexposed                                                                                                  |                    |
| Variables                    | 7      | Clearly define all outcomes, exposures, predictors, potential confounders, and effect modifiers. Give diagnostic criteria, if applicable                                             | 5-6                |
| Data sources/<br>measurement | 8*     | For each variable of interest, give sources of data and details of methods of assessment (measurement). Describe comparability of assessment methods if there is more than one group | 5-6                |
| Bias                         | 9      | Describe any efforts to address potential sources of bias                                                                                                                            | 6                  |
| Study size                   | 10     | Explain how the study size was arrived at                                                                                                                                            | 5                  |
| Quantitative variables       | 11     | Explain how quantitative variables were handled in the analyses. If applicable, describe which groupings were chosen and why                                                         | 5-6                |
| Statistical methods          | 12     | (a) Describe all statistical methods, including those used to control for confounding                                                                                                | 7                  |
|                              |        | (b) Describe any methods used to examine subgroups and interactions                                                                                                                  | 7                  |
|                              |        | (c) Explain how missing data were addressed                                                                                                                                          | 5                  |
|                              |        | (d) If applicable, explain how loss to follow-up was addressed                                                                                                                       | 7                  |
|                              |        | (e) Describe any sensitivity analyses                                                                                                                                                |                    |
| <b>Results</b>               |        |                                                                                                                                                                                      |                    |

|                          |     |                                                                                                                                                                                                              |       |
|--------------------------|-----|--------------------------------------------------------------------------------------------------------------------------------------------------------------------------------------------------------------|-------|
| Participants             | 13* | (a) Report numbers of individuals at each stage of study—eg numbers potentially eligible, examined for eligibility, confirmed eligible, included in the study, completing follow-up, and analysed            | 5     |
|                          |     | (b) Give reasons for non-participation at each stage                                                                                                                                                         | 5     |
|                          |     | (c) Consider use of a flow diagram                                                                                                                                                                           |       |
| Descriptive data         | 14* | (a) Give characteristics of study participants (eg demographic, clinical, social) and information on exposures and potential confounders                                                                     | 7     |
|                          |     | (b) Indicate number of participants with missing data for each variable of interest                                                                                                                          | 8     |
|                          |     | (c) Summarise follow-up time (eg, average and total amount)                                                                                                                                                  | 7     |
| Outcome data             | 15* | Report numbers of outcome events or summary measures over time                                                                                                                                               | 7     |
| Main results             | 16  | (a) Give unadjusted estimates and, if applicable, confounder-adjusted estimates and their precision (eg, 95% confidence interval). Make clear which confounders were adjusted for and why they were included | 8-11  |
|                          |     | (b) Report category boundaries when continuous variables were categorized                                                                                                                                    | 9, 11 |
|                          |     | (c) If relevant, consider translating estimates of relative risk into absolute risk for a meaningful time period                                                                                             |       |
| Other analyses           | 17  | Report other analyses done—eg analyses of subgroups and interactions, and sensitivity analyses                                                                                                               | 9-11  |
| <b>Discussion</b>        |     |                                                                                                                                                                                                              |       |
| Key results              | 18  | Summarise key results with reference to study objectives                                                                                                                                                     | 12    |
| <b>Limitations</b>       |     |                                                                                                                                                                                                              |       |
| Interpretation           | 20  | Give a cautious overall interpretation of results considering objectives, limitations, multiplicity of analyses, results from similar studies, and other relevant evidence                                   | 12-13 |
| Generalisability         | 21  | Discuss the generalisability (external validity) of the study results                                                                                                                                        | 13    |
| <b>Other information</b> |     |                                                                                                                                                                                                              |       |
| Funding                  | 22  | Give the source of funding and the role of the funders for the present study and, if applicable, for the original study on which the present article is based                                                | 14    |

\*Give information separately for cases and controls in case-control studies and, if applicable, for exposed and unexposed groups in cohort and cross-sectional studies.

**Note:** An Explanation and Elaboration article discusses each checklist item and gives methodological background and published examples of transparent reporting. The STROBE checklist is best used in conjunction with this article (freely available on the Web sites of PLoS Medicine at <http://www.plosmedicine.org/>, Annals of Internal Medicine at <http://www.annals.org/>, and Epidemiology at <http://www.epidem.com/>). Information on the STROBE Initiative is available at [www.strobe-statement.org](http://www.strobe-statement.org).

# BMJ Open

## Air pollution, physical activity and ischemic heart disease - A prospective cohort study of interaction effects

|                                 |                                                                                                                                                                                                                                                                                                                                                                                                                                                                         |
|---------------------------------|-------------------------------------------------------------------------------------------------------------------------------------------------------------------------------------------------------------------------------------------------------------------------------------------------------------------------------------------------------------------------------------------------------------------------------------------------------------------------|
| Journal:                        | <i>BMJ Open</i>                                                                                                                                                                                                                                                                                                                                                                                                                                                         |
| Manuscript ID                   | bmjopen-2020-040912.R1                                                                                                                                                                                                                                                                                                                                                                                                                                                  |
| Article Type:                   | Original research                                                                                                                                                                                                                                                                                                                                                                                                                                                       |
| Date Submitted by the Author:   | 04-Jan-2021                                                                                                                                                                                                                                                                                                                                                                                                                                                             |
| Complete List of Authors:       | Raza, Wasif; Umeå Universitet Medicinska fakulteten, Public Health and Clinical Medicine, Sustainable Health<br>Krachler, Benno; Umeå Universitet Medicinska fakulteten, Public Health and Clinical Medicine, Sustainable Health<br>Forsberg, Bertil; Umeå Universitet Medicinska fakulteten, Public Health and Clinical Medicine, Sustainable health<br>Sommar, Johan; Umeå Universitet Medicinska fakulteten, Public Health and Clinical Medicine, Sustainable health |
| <b>Primary Subject Heading</b>: | Public health                                                                                                                                                                                                                                                                                                                                                                                                                                                           |
| Secondary Subject Heading:      | Epidemiology                                                                                                                                                                                                                                                                                                                                                                                                                                                            |
| Keywords:                       | Ischaemic heart disease < CARDIOLOGY, PUBLIC HEALTH, Coronary heart disease < CARDIOLOGY                                                                                                                                                                                                                                                                                                                                                                                |
|                                 |                                                                                                                                                                                                                                                                                                                                                                                                                                                                         |

SCHOLARONE™  
Manuscripts



I, the Submitting Author has the right to grant and does grant on behalf of all authors of the Work (as defined in the below author licence), an exclusive licence and/or a non-exclusive licence for contributions from authors who are: i) UK Crown employees; ii) where BMJ has agreed a CC-BY licence shall apply, and/or iii) in accordance with the terms applicable for US Federal Government officers or employees acting as part of their official duties; on a worldwide, perpetual, irrevocable, royalty-free basis to BMJ Publishing Group Ltd ("BMJ") its licensees and where the relevant Journal is co-owned by BMJ to the co-owners of the Journal, to publish the Work in this journal and any other BMJ products and to exploit all rights, as set out in our [licence](#).

The Submitting Author accepts and understands that any supply made under these terms is made by BMJ to the Submitting Author unless you are acting as an employee on behalf of your employer or a postgraduate student of an affiliated institution which is paying any applicable article publishing charge ("APC") for Open Access articles. Where the Submitting Author wishes to make the Work available on an Open Access basis (and intends to pay the relevant APC), the terms of reuse of such Open Access shall be governed by a Creative Commons licence – details of these licences and which [Creative Commons](#) licence will apply to this Work are set out in our licence referred to above.

Other than as permitted in any relevant BMJ Author's Self Archiving Policies, I confirm this Work has not been accepted for publication elsewhere, is not being considered for publication elsewhere and does not duplicate material already published. I confirm all authors consent to publication of this Work and authorise the granting of this licence.

# Air pollution, physical activity and ischemic heart disease - A prospective cohort study of interaction effects

Wasif Raza <sup>1,\*</sup>, Benno Krachler <sup>1</sup>, Bertil Forsberg <sup>1</sup> and Johan Nilsson Sommar <sup>1</sup>

<sup>1</sup>Department of Public Health and Clinical Medicine, Section of Sustainable Health, Umeå University, Sweden; [wasif.raza@umu.se](mailto:wasif.raza@umu.se) (W.R.); [benno.krachler@umu.se](mailto:benno.krachler@umu.se) (B.K.); [bertil.forsberg@umu.se](mailto:bertil.forsberg@umu.se) (B.F.); [johan.sommar@umu.se](mailto:johan.sommar@umu.se) (J.N.S.)

\* Correspondence: [wasif.raza@umu.se](mailto:wasif.raza@umu.se) ; Tel.: +46-72-289-5144

For peer review only



30

## 31 Abstract

32 **Objective:** To assess a possible interaction effect between physical activity and air pollution on first  
33 incidence of ischemic heart disease (IHD).

34 **Design:** Prospective cohort study

35 **Setting:** Umeå, Northern Sweden

36 **Participants:** We studied 34,748 adult participants of Västerbotten Intervention Programme cohort  
37 from 1990 to January 2014. Annual particulate matter concentrations (PM<sub>2.5</sub> and PM<sub>10</sub>) at the  
38 participants' residential addresses were modelled and a questionnaire on frequency of exercise and  
39 active commuting was completed at baseline. Cox proportional hazards modelling was used to estimate  
40 1) association with physical activity at different levels of air pollution, and 2) the association with  
41 particulate matter at different levels of physical activity.

42 **Outcome:** First incidence of IHD.

43 **Results:** Over a mean follow-up of 12.4 years, there were 1,148 IHD cases. Overall, we observed an  
44 increased risk of IHD among individuals with higher concentrations of particles at their home address.  
45 Exercise at least twice a week was associated with a lower risk of IHD among participants with high  
46 residential PM<sub>2.5</sub> (0.60; 95% CI: 0.44-0.82) and PM<sub>10</sub> (0.55; 95% CI: 0.4-0.76). The same beneficial effect  
47 was not observed with low residential PM<sub>2.5</sub> (0.94; 95% CI: 0.72-1.22) and PM<sub>10</sub> (0.99; 95% CI: 0.76-1.29).  
48 An increased risk associated with higher long-term exposure to particles was only observed among  
49 participants never exercising in training clothes and among those not performing any active commuting.  
50 However, only the interaction effect on hazard ratios for exercise was statistically significant.

51 **Conclusion:** Exercise was associated with a lower risk of first incidence of IHD among individuals with  
52 higher residential particle concentrations. An air pollution-associated risk was only observed among  
53 those who exercised less. The findings support the promotion of physical activity and a mitigation of air  
54 pollution.

55

56 **Key Words:** Air pollution, PM<sub>2.5</sub>, PM<sub>10</sub>, exercise, interaction, ischemic heart disease

57

58

59

60

61

62

63

## Strengths and limitations of this study

65

- 66 • This study simultaneously evaluated the impact of physical activity and air pollution and their  
67 interaction on first incident IHD cases in a population with relatively low level of air pollution  
68 concentrations.
- 69 • For air pollution exposure, this study used individual time varying exposures of annual mean  
70 concentrations during follow-up based on population address registries.
- 71 • Another strength is the prospective design and the availability of baseline data on several  
72 important confounders.
- 73 • No exposure-response assessment could be performed since the statistical power only allowed  
74 for the formation of two exposure categories.
- 75 • Differences in air pollution exposure during active commuting might cause biased estimates  
76 due to exposure misclassification.

77

78

79

80

81

82

83

84

85

86

87

88

89

90

91

92

93

94

95

96

97

98

99

100

101

102

103

# 1 Introduction

Cardiovascular disease (CVD) is the most important cause of morbidity and premature mortality worldwide, accounting for 422.3 million cases and 17.92 million deaths in 2015 [1]. There is solid evidence that inflammation is a key upstream pathogenic mechanism [2]. Ambient air pollution, generally comprising ozone, sulphur dioxide, nitrogen dioxide and particulate matter (PM), is a leading contributor to the global burden of disease and an important risk factor for morbidity and mortality. Particulate matter is often measured as  $PM_{2.5}$ , to represent particles with a diameter of 2.5 micrometres or less, and  $PM_{10}$ , to represent particles with a diameter of 10 micrometres or less. Ambient  $PM_{2.5}$  exposure alone has been estimated to account for 4.2 million deaths in 2015, of which 1.5 million deaths were caused by ischemic heart diseases (IHD) [3]. The underlying mechanisms mediating the pathogenic impact of air pollution involve systemic oxidative stress and inflammation [4,5]. Physical activity is a salutogenic factor in numerous non-communicable chronic diseases (NCDs), with physical inactivity being responsible for 6% of the burden of disease from coronary heart disease [6,7]. The beneficial effects of physical activity include protection against low-grade inflammation by releasing anti-inflammatory substances, such as interleukin 6, from contracting muscles [8,9].

Rapid urbanization and increased use of motorized transport contribute to modern day problems such as traffic congestion, traffic related air pollution and lack of physical activity. Promotion of active transportation by changing mode of transport from car to cycling and walking are among the different strategies used to tackle these challenges [10–12]. As inflammation is a causative mechanism for cardiovascular disease, it is conceivable that the anti-inflammatory effects of physical activity may mitigate the harmful effects associated with exposure to air pollution. However, one major concern with physical activity in a polluted environment is the increased inhalation of particles due to an increase in respiratory volume that may counteract the beneficial effects of physical activity [13,14].

The long-term effects of air pollution among individuals with different levels of leisure time physical activity have been estimated within the Danish Diet, Cancer, and Health cohort. The incidence of diabetes was assessed in relation to leisure time physical activity and nitrogen dioxide ( $NO_2$ ) concentration at the home address. Residential  $NO_2$  was found to be associated with increased incidence of diabetes, but only among physically active individuals [15]. As far as we know, only one study has examined the modifying effect of air pollution on the association between physical activity and cardiovascular disease. In their recent study, Kubesch and colleagues conclude that physical activity reduced the risk of first incidence of myocardial infarction (MI) and recurrent MI among individuals with high  $NO_2$  concentration at the residential addresses [16]. As only one pollutant ( $NO_2$ ) and only one cardiovascular outcome (MI) have been studied, the knowledge of a possible interaction between air pollution and physical activity on CVD is inconclusive.

A Taiwanese study found an independent inverse association of habitual physical activity with inflammation across different levels of  $PM_{2.5}$  exposure, although long term exposure was associated with increased inflammation at all levels of physical activity [17].

We therefore aimed to examine interaction effects between physical activity and long-term exposure to  $PM_{2.5}$  and  $PM_{10}$  at residential addresses on the incidence of ischemic heart disease (IHD). We wanted to assess: 1) whether air pollution modifies the beneficial effects of physical activity on IHD, and 2) whether physical activity modifies the harmful effects of air pollution on IHD.

## 2 Methods

To determine the interaction effect between air pollution and physical activity on IHD incidence, we combined cohort data which comprised risk factors for IHD, national registry data on IHD incidence from the Swedish National Board of Health and Welfare, and yearly annual mean air pollution particle concentrations at the individuals' residential addresses using dispersion models from the Swedish Clean Air and Climate Research Program (SCAC).

VIP (Västerbotten Intervention Programme) is a population based screening and prospective cohort study, developed to reduce the risk of future CVD and diabetes by promoting a healthy lifestyle among individuals living in the Västerbotten region. The SCAC developed methods to estimate exposure to source-specific particulate matter such as PM<sub>2.5</sub> and PM<sub>10</sub> and at residential addresses in Gothenborg, Stockholm and Umeå.

### 2.1 Study population

VIP is an ongoing population-based health investigation survey of all individuals at ages 40, 50 or 60 years, depending upon risk factors, living in the Västerbotten region, who are invited to participate in systematic risk factor screening and individual counselling about healthy lifestyle habits. A detailed description of VIP has been presented elsewhere [18]. Between 1990 and 2014, a total of 42,488 of the VIP participants that lived in Umeå Municipality during the study period were included in the analysis. After exclusion of 7,740 participants with missing information on exercise, the study sample thus consisted of 34,748 individuals, 53% men and 47% women, 40-60 years of age at baseline examination, with no previous history of IHD at time of enrolment. After exclusion of individuals with missing information on included confounders the final number of included individuals were 31424 and 29218 for the analyses of exercise in training clothes and active commuting, respectively. All participants in the VIP gave their informed written consent, and the study was approved by the Regional Ethics Review Board at Umea University (DNR: 2014-136-32M and 2015/16-31Ö).

### 2.2 Leisure time exercise and active commuting

The VIP questionnaire includes various self-reported information on physical activity including frequency of leisure time physical activity and active commuting (cycling or walking to and from work). The association with IHD was assessed in relation to frequency of exercise in training clothes and amounts of active commuting. Exercise during the previous three months was categorized as never, rarely, once per week, 2-3 times per week or more than 3 times per week. Based on this information, participants were categorized as "Twice per week or more" if they exercised with a frequency of 2-3 times per week and more, "At most once a week" if they exercised rarely or once per week, and "Never" if no activity was performed. For active commuting, participants were asked about their mode of transport to work each season. Participants were classified in three categories: "Non- active commuting" if commuting every season by car or bus, "At most two seasons out of four" if cycling or walking at most half a year and "More than two seasons out of four", if cycling and walking more than half a year.

## 193 2.3 Covariates

194  
195 The VIP questionnaire also gathered information on participants' educational status, occupation,  
196 smoking, alcohol intake and economic status. Education was defined according to the International  
197 Standard Classification of Education (ISCED), United Nations Educational, Scientific and Cultural  
198 Organization (UNESCO) 1997. Participants were asked about the highest level education they had  
199 achieved with eight predefined categories ranging from "pre-school" to "university education." Alcohol  
200 intake was assessed by the reported frequency of consumption with answering options that ranged  
201 from "Never" to "2-4 times/week." Information on smoking was gathered by using the question, "How  
202 often do you smoke?" Information on occupational status was obtained with a question, "What kind of  
203 job do you have nowadays?" with the answering options of eight predefined categories. Finally,  
204 information on occupation status was asked with the question, "What is your current occupation?" with  
205 8 categories ranging from permanently employed to retired.

## 207 2.4 Air pollution concentrations

208  
209 Annual mean total concentrations of PM<sub>2.5</sub> and PM<sub>10</sub> for the years 1990-2011 (and thereafter linearly  
210 extrapolated up until year 2014) were obtained from the SCAC research program, described in detail  
211 elsewhere [19]. Briefly, concentrations of PM<sub>2.5</sub> and PM<sub>10</sub> were estimated within SCAC by applying  
212 dispersion models on local or regional emission inventories. These emission inventories contain detailed  
213 information on emissions from different source categories, such as road traffic exhaust, road traffic non-  
214 exhaust, domestic heating, shipping and industrial activities. For Umeå, inventories were validated  
215 through monitoring for consistency. Emissions from small-scale residential heating were assessed using  
216 registry data from chimney sweepers that included the type of wood stove or boiler. The addresses of  
217 these residences were geocoded using the geographical centre coordinate of the estate. Road traffic  
218 emission factors for PM exhaust for different vehicle types, speeds and driving conditions were  
219 calculated based on the Handbook Emission Factors for Road Transport (HBEFA) version 3.1 [20].  
220 Estimates for non-exhaust contribution from brake and tire wear were based on Omstedt et al. [21]. The  
221 annual average emission from shipping was used in the modelling on a 1x1 km<sup>2</sup> grid resolution. The  
222 emissions from other sources such as industrial processes, off-road machinery and agriculture was  
223 collected from Swedish Meteorological and Hydrological Institute (SMHI). To obtain annual average  
224 emissions of PM<sub>2.5</sub> and PM<sub>10</sub>, Gaussian models included in the Airviro air quality management system  
225 (SMHI, 2010) were used for simulation based on hourly meteorological data for 1990, 2000 and 2011  
226 [22]. The comparison between measured and modelled PM<sub>2.5</sub> and PM<sub>10</sub> agreed well at most monitoring  
227 stations ( $r^2=0.87$  and  $r^2=0.65$ , respectively).

## 229 2.5 Outcome

230  
231 We linked the records in VIP and through the unique Swedish personal identification number with data  
232 on first IHD event cases from the National Patient Register and the Cause of Death Register, both at the  
233 National Board of Health and Welfare, using primary discharge diagnoses for IHD according to  
234 International Classification of Diseases, 10th revision (ICD-10): code I20-125.

## 2.6 Patient and public involvement

No patients were involved in this study.

237

238

## 2.7 Statistical Analysis

240

We performed survival analyses using Cox regression proportion hazard model to estimate hazard ratios (HRs), and 95% confidence intervals (CIs), to estimate 1) the association between first incident IHD and air pollution exposure at different levels of physical activity and 2) the association between first incident IHD and physical activity at different levels of air pollution exposure. Age was used as the underlying timescale since it is a stronger confounder than calendar time. Follow-up started at date of recruitment to the cohort and ended with the earliest of the date of first IHD case, emigration, death, or 31 December 2013. Interaction between physical activity and air pollution and their impact on IHD was studied by introducing an interaction term into the model. Residential annual mean particle concentrations were used to calculate moving averages over the recent five years which were thereafter categorized as below or above the median concentration for PM<sub>2.5</sub> and PM<sub>10</sub>, respectively. Interaction with physical activity was assessed based on 1) the frequency of exercise in training clothes and 2) the number of seasons the individual walked or cycled to work. Active commuting by walking or cycling was categorized into three groups: non-active commuters, active commuters at most half of the year (up to two out of four seasons), active commuters more than half a year (more than two out of four seasons). Estimates were adjusted for: calendar year as a penalized cubic spline with 3 degrees of freedom, gender (male vs female), highest education level (compulsory, high school, university), alcohol intake (never, once/month or sometimes, 2-4 times/month, 2-3 times/week, ≥4 times/week), smoking (previous non-regular smoker, non-regular smoker, cigarette smoker, cigar or pipe smoker), occupation (gainfully employed, unemployed, not gainfully employed, retired), and registry data on area level mean income. In the basic model we adjusted only for gender and exposure year. All analyses were performed using R version 3.4.2, and the statistical inference was conducted with a 5% significance level. T-tests, global analysis of variance tests (ANOVA) and chi-square tests were used to test for differences in means and proportions of covariates between categories of exercise in training clothes (Table 1). The Schoenfeld residuals test was used to assess the assumption of proportional hazards. A sensitivity analysis was conducted by excluding participants with short follow-up time.

266

## 3 Results

268

The mean age at recruitment to this cohort was 45.8 years. Among the 34,748 participants 1,148 cases of IHD were identified during a mean follow-up time of 12.4 years. Of those cases, 500 never exercised, 529 exercised at most once a week and 119 exercised at least twice a week. Table 1 summarizes characteristics of participants according to different levels of leisure time physical activity. Participants not reporting any leisure time exercise were older and more likely to be male, non-commuters and to belong to a lower socioeconomic group. Subjects performing moderate to high-level physical activity, were more likely to be women, non-smokers, and active commuters. The 5-year mean of PM<sub>10</sub> and PM<sub>2.5</sub> concentration were different between leisure time physical activity categories, with at most 7 and 6% difference respectively for PM<sub>10</sub> and PM<sub>2.5</sub>.

277

1  
2  
3 278  
4 279  
5 280  
6 281  
7 282  
8 283  
9 284  
10 285  
11 286  
12 287

Table 1: Characteristics of participants at different levels of exercise in training clothes at baseline

| Characteristics                                   | Never        | At most once a week | Twice per week or more | p      |
|---------------------------------------------------|--------------|---------------------|------------------------|--------|
| Exercise in training clothes n (%)                | 13043 (37.5) | 14994 (43.2)        | 6711 (19.3)            |        |
| PM <sub>10</sub> , µg/m <sup>3</sup> (mean (SD))  | 10.93 (2.00) | 11.06 (1.96)        | 10.39 (1.94)           | <0.001 |
| PM <sub>2.5</sub> , µg/m <sup>3</sup> (mean (SD)) | 6.41 (1.12)  | 6.49 (1.12)         | 6.11 (1.11)            | <0.001 |
| Frequency of active commuting (%)                 |              |                     |                        | <0.001 |
| Non-active commuting                              | 6369 (48.8)  | 6409 (42.7)         | 2666 (39.7)            |        |
| At most two seasons of four                       | 1806 (13.8)  | 2547 (17.0)         | 1037 (15.5)            |        |
| More than two seasons of four                     | 3506 (26.9)  | 4976 (33.2)         | 2555 (38.1)            |        |
| Missing                                           | 1362 (10.4)  | 1062 (7.1)          | 453 (6.8)              |        |
| Alcohol intake (%)                                |              |                     |                        | <0.001 |
| Never                                             | 135 (1.0)    | 120 (0.8)           | 79 (1.2)               |        |
| Once/month or sometimes                           | 5337 (40.9)  | 5950 (39.7)         | 2790 (41.6)            |        |
| 2-4 times/month                                   | 2000 (15.3)  | 2436 (16.2)         | 1061 (15.8)            |        |
| 2-3 times/week                                    | 97 (0.7)     | 93 (0.6)            | 54 (0.8)               |        |
| ≥ 4 times/week                                    | 5068 (38.9)  | 5861 (39.1)         | 2265 (33.8)            |        |
| Missing                                           | 406 (3.1)    | 534 (3.6)           | 462 (6.9)              |        |
| Smoking (%)                                       |              |                     |                        | <0.001 |
| Never smoker                                      | 5139 (39.4)  | 7240 (48.3)         | 3467 (51.7)            |        |
| Previous non-regular smoker                       | 1072 (8.2)   | 1458 (9.7)          | 711 (10.6)             |        |
| Non-regular smoker                                | 581 ( 4.5)   | 807 ( 5.4)          | 348 ( 5.2)             |        |
| Previous regular smoker                           | 2729 (20.9)  | 2865 (19.1)         | 1201 (17.9)            |        |
| Cigarette smoker                                  | 2789 (21.4)  | 1805 (12.0)         | 426 ( 6.3)             |        |
| Cigar or pipe smoker                              | 186 (1.4)    | 130 (0.9)           | 45 ( 0.7)              |        |
| Missing                                           | 547 ( 4.2)   | 689 ( 4.6)          | 513 (7.6)              |        |
| Highest education level (%)                       |              |                     |                        | <0.001 |
| Compulsory                                        | 5534 (42.4)  | 4319 (28.8)         | 1369 (20.4)            |        |
| High                                              | 3573 (27.4)  | 4116 (27.5)         | 1951 (29.1)            |        |
| University                                        | 3449 (26.4)  | 5933 (39.6)         | 2911 (43.4)            |        |
| Missing                                           | 487 (3.7)    | 626 (4.2)           | 480 (7.2)              |        |
| Gender %, (men)                                   | 7072 (54.2)  | 8036 (53.6)         | 3274 (48.8)            | <0.001 |
| Age, y (mean (SD))                                | 47.28 (9.09) | 45.27 (9.02)        | 44.32 (8.61)           | <0.001 |
| Occupation (%)                                    | <0.001       |                     |                        |        |
| Gainfully employed                                | 10536 (80.8) | 12690 (84.6)        | 5452 (81.2)            |        |
| Unemployed                                        | 478 (3.7)    | 382 (2.5)           | 174 (2.6)              |        |
| Not gainfully employed                            | 318 (2.4)    | 352 (2.3)           | 160 (2.4)              |        |
| Retired                                           | 673 (5.2)    | 449 (3.0)           | 194 (2.9)              |        |
| Missing                                           | 1038 (8.0)   | 1121 (7.5)          | 731 (10.9)             |        |

| Characteristics                         | Never                   | At most once a week     | Twice per week or more  | p      |
|-----------------------------------------|-------------------------|-------------------------|-------------------------|--------|
| Mean income for the neighbourhood (SEK) | 128285.70<br>(23017.70) | 130332.22<br>(23875.04) | 130221.55<br>(24605.92) | <0.001 |

288  
289  
290  
291  
292  
293  
294

Compared with individuals who reported no exercise, those participants that exercised at least twice per week had a 24% lower risk of IHD (Table 2). The corresponding overall estimate associated with active commuting was a 13% reduced risk of IHD among individuals commuting more than two seasons per year.

295  
296  
297  
298  
299  
300  
301  
302  
303

Allowing for an interaction between the frequency of exercise in training clothes and particle concentrations (PM<sub>10</sub> and PM<sub>2.5</sub>) at the home address, the average 24% risk reduction from exercising at least twice per week was found to be driven by statistically significant interaction between exercise and particle exposure with 45% and 40% risk reduction among individuals with high PM<sub>10</sub> and PM<sub>2.5</sub> concentrations, respectively (table 2). The interaction coefficients estimating the additional benefit of exercise among individuals with a high PM<sub>10</sub> concentration at their home addresses were a 3% increased risk among those who exercised at most once a week whereas a decreased risk of 44% was estimated among those who exercised at least twice a week. The corresponding estimates among those with high PM<sub>2.5</sub> concentrations were a risk reduction of 0% and 36% respectively.

304  
305  
306  
307  
308  
309  
310

For active commuters with low particle exposure at their home address, the risk of incident IHD was 17% and 18% higher among those commuting one or two seasons per year and 7% and 3% lower among those commuting at least two seasons per year, for PM<sub>10</sub> and PM<sub>2.5</sub> respectively. The benefit of active commuting was larger among individuals with a high particle concentration at their home address: risk reductions for active commuting during one or two seasons were 12% and 13% and for more than two seasons 18% and 21% respectively, compared with non-active commuters. No statistically significant interaction was found between active commuting and particle concentrations at the home address.

311  
312  
313  
314  
315  
316  
317

Table 2: Hazard ratios (95% CI) for IHD associated with different exercise and commuting habits among persons with different air pollution exposure at home addresses.

| Exercise in training clothes | Overall model with no interaction effects | Proportional hazard p-value* | Adjusted <sup>a</sup> HRs in categories of high and low particle exposure |      |                                    |      | Adjusted <sup>a</sup> interaction hazard ratio | Proportional hazard p-value <sup>d</sup> |
|------------------------------|-------------------------------------------|------------------------------|---------------------------------------------------------------------------|------|------------------------------------|------|------------------------------------------------|------------------------------------------|
|                              |                                           |                              | Low PM <sub>10</sub> <sup>b</sup>                                         |      | High PM <sub>10</sub> <sup>b</sup> |      |                                                |                                          |
| Never                        | 1                                         |                              | 1                                                                         |      | 1                                  |      | 1.03 (0.81-1.32)                               | 0.75                                     |
| ≤ once/week                  | 1.03 (0.90-1.16)                          | 0.35                         | 1.01 (0.84-1.21)                                                          | 0.67 | 1.04 (0.88-1.23)                   | 0.35 | 0.56 (0.37-0.84)                               | 0.65                                     |



|                             |                   |      |                                    |      |                                     |      |                  |      |
|-----------------------------|-------------------|------|------------------------------------|------|-------------------------------------|------|------------------|------|
| ≥ twice/week                | 0.76 (0.62-0.93)  | 0.08 | 0.99 (0.76-1.29)                   | 0.47 | 0.55 (0.40-0.76)                    | 0.24 |                  |      |
|                             |                   |      | Low PM <sub>2.5</sub> <sup>c</sup> |      | High PM <sub>2.5</sub> <sup>c</sup> |      |                  |      |
| Never                       |                   |      | 1                                  |      | 1                                   |      | 1.00 (0.78-1.28) | 0.61 |
| ≤ once/week                 |                   |      | 1.03 (0.86-1.23)                   | 0.78 | 1.03 (0.87-1.22)                    | 0.30 | 0.64 (0.43-0.96) | 0.30 |
| ≥ twice/week                |                   |      | 0.94 (0.72-1.22)                   | 0.69 | 0.60 (0.44-0.82)                    | 0.09 |                  |      |
| Active commuting per season |                   |      | Low PM <sub>10</sub> <sup>b</sup>  |      | High PM <sub>10</sub> <sup>b</sup>  |      |                  |      |
| Non-active commuting        | 1                 |      | 1                                  |      | 1                                   |      |                  |      |
| ≤ two seasons of four       | 1.01 (0.86-1.19)  | 0.50 | 1.17 (0.93-1.47)                   | 0.35 | 0.88 (0.70-1.11)                    | 0.70 | 0.76 (0.55-1.04) | 0.34 |
| > two seasons of four       | 0.87 (0.76-0.998) | 0.85 | 0.93 (0.76-1.14)                   | 0.48 | 0.82 (0.68-0.98)                    | 0.89 | 0.88 (0.67-1.15) | 0.53 |
|                             |                   |      | Low PM <sub>2.5</sub> <sup>c</sup> |      | High PM <sub>2.5</sub> <sup>c</sup> |      |                  |      |
| Non-active commuting        |                   |      | 1                                  |      | 1                                   |      |                  |      |
| ≤ two seasons of four       |                   |      | 1.18 (0.94-1.49)                   | 0.43 | 0.87 (0.69-1.10)                    | 0.76 | 0.73 (0.53-1.01) | 0.43 |
| > two seasons of four       |                   |      | 0.97 (0.80-1.19)                   | 0.37 | 0.79 (0.65-0.95)                    | 0.89 | 0.81 (0.62-1.06) | 0.44 |

318  
319  
320  
321  
322  
323  
324  
325  
326  
327  
328  
329  
330  
331  
332  
333  
334

<sup>a</sup>Adjusted for sex, calendar year, education, smoking, alcohol intake, occupation, neighbourhood mean income, leisure time physical activity, and active commuting

<sup>b</sup>Low PM<sub>10</sub>: ≤9.6 µg/m<sup>3</sup>; High PM<sub>10</sub>: >9.6 µg/m<sup>3</sup>

<sup>c</sup>Low PM<sub>2.5</sub> ≤5.7 µg/m<sup>3</sup>; High PM<sub>2.5</sub>: >5.7 µg/m<sup>3</sup>

<sup>d</sup> p-value of the Schoenfeld residual test of proportional hazards

335 Individuals exposed to high concentrations of PM<sub>10</sub> and PM<sub>2.5</sub> at their home address had a 14% and 1%  
336 increased risk of incident IHD respectively, compared to individuals with low concentrations (Table 3).  
337 These increased risks were, however, not statistically significant.

338 When including an interaction between particle concentrations and exercise, risk estimates showed a  
339 positive association between air pollution and IHD among individuals performing no exercise and those  
340 exercising no more than once a week, whereas a negative association was found among those exercising  
341 more than twice a week (Table 3).

342 Compared with individuals with low residential particle concentration, a high concentration of PM<sub>10</sub> was  
343 associated with 21% and 25% increased risk for IHD for those who never exercised in training clothes  
344 and those who exercised at most once a week, respectively, and showed a 32% decreased risk for those  
345 exercising at least twice a week; only the association for those exercising at most once a week was  
346 statistically significant. The corresponding estimates associated with PM<sub>2.5</sub> are increased risk of IHD of  
347 16% for those never exercising and those who exercised at most once a week, and a decreased risk of  
348 26% among those exercising at least twice a week (Table 3); none of these associations was statistically  
349 significant.

IHD risk associated with high residential PM<sub>10</sub> and PM<sub>2.5</sub> compared with low residential particle concentration was found to be 26% and 24% higher, respectively, among those never actively commuting; both these results were statistically significant. Among those actively commuting one or two seasons per year, IHD risk was 5% and 9% lower, respectively, while among those actively commuting more than two seasons out of four, the risk was 10% and 1% higher, respectively; none of these risks were, however, statistically significantly different from the air pollution-associated risks among the active commuters (Table 2). Overall, no statistically significant modifying effect of exercise and active commuting on the association between high particle concentration at home addresses and IHD was observed (Table 3).

Excluding participants with short follow-up time did not affect the main conclusions of our study, however estimates tended to be lower for overall effect of air pollution on IHD (Supplementary file A: Table 2).

Table 3: Hazard ratios (95% CI) for IHD associated with high air pollution levels (vs low) at home address among persons with different exercise/commuting habits.

|                                     | Overall model with no interaction effects | Proportional hazard p-value <sup>d</sup> | Adjusted <sup>a</sup> HRs in categories of high and low particle exposure |                                          |                       |                                          |                       |                                          |
|-------------------------------------|-------------------------------------------|------------------------------------------|---------------------------------------------------------------------------|------------------------------------------|-----------------------|------------------------------------------|-----------------------|------------------------------------------|
|                                     |                                           |                                          | Exercise in training clothes                                              |                                          | Active commuting      |                                          | P-value               |                                          |
|                                     |                                           |                                          | Never                                                                     | Proportional hazard p-value <sup>d</sup> | ≤ once/week           | Proportional hazard p-value <sup>d</sup> | ≥ twice/week          | Proportional hazard p-value <sup>d</sup> |
| Low PM <sub>10</sub> <sup>b</sup>   | 1                                         |                                          | 1                                                                         |                                          | 1                     |                                          | 1                     |                                          |
| High PM <sub>10</sub> <sup>b</sup>  | 1.14 (0.9-1.45)                           | 0.55                                     | 1.21 (0.97-1.49)                                                          | 0.71                                     | 1.25 (1.01-1.54)      | 0.45                                     | 0.68 (0.46-0.998)     | 0.50                                     |
| Low PM <sub>2.5</sub> <sup>c</sup>  | 1                                         |                                          | 1                                                                         |                                          | 1                     |                                          | 1                     |                                          |
| High PM <sub>2.5</sub> <sup>c</sup> | 1.01 (0.8-1.28)                           | 1.10                                     | 1.16 (0.94-1.44)                                                          | 0.38                                     | 1.16 (0.95-1.43)      | 0.13                                     | 0.74 (0.51-1.09)      | 0.11                                     |
|                                     |                                           |                                          | Non-active commuting                                                      |                                          | ≤ two seasons of four |                                          | > two seasons of four |                                          |
| Low PM <sub>10</sub> <sup>b</sup>   |                                           |                                          | 1                                                                         |                                          | 1                     |                                          | 1                     |                                          |
| High PM <sub>10</sub> <sup>b</sup>  |                                           |                                          | 1.26 (1.03-1.54)                                                          | 0.39                                     | 0.95 (0.7-1.29)       | 0.66                                     | 1.10 (0.86-1.41)      | 0.17                                     |
| Low PM <sub>2.5</sub> <sup>c</sup>  |                                           |                                          | 1                                                                         |                                          | 1                     |                                          | 1                     |                                          |
| High PM <sub>2.5</sub> <sup>c</sup> |                                           |                                          | 1.24 (1.02-1.51)                                                          | 0.11                                     | 0.91 (0.67-1.24)      | 0.84                                     | 1.01 (0.79-1.29)      | 0.04                                     |

<sup>a</sup>Adjusted for sex, calendar year, education, smoking, alcohol intake, occupation, neighbourhood mean income, leisure time physical activity, active commuting

<sup>b</sup>Low PM<sub>10</sub>: ≤9.6 µg/m<sup>3</sup>; High PM<sub>10</sub>: >9.6 µg/m<sup>3</sup>

<sup>c</sup>Low PM<sub>2.5</sub> ≤5.7 µg/m<sup>3</sup>; High PM<sub>2.5</sub>: >5.7 µg/m<sup>3</sup>

<sup>d</sup> p-value of the Schoenfeld residual test of proportional hazards

1  
2  
3 374  
4 375  
5 376  
6 377  
7 378  
8 379  
9 380  
10 381  
11 382  
12 383  
13 384

## 4 Discussion

385  
386 Overall, we found increased risk of first incident IHD associated with air pollution at the home address  
387 but a protective effect of physical activity. A statistically significant beneficial effect of exercise was  
388 found among individuals with high PM10/PM2.5, but not among individuals with low levels. Also, for  
389 active commuting the benefits were greater among individuals with high residential particle  
390 concentrations, but these differences were not statistically significant. Air pollution concentration-  
391 associated risks were found among individuals who exercise at most once a week but not among  
392 individuals exercising at least twice a week. Statistically significantly increased risks were also found  
393 among non-active commuters. These risks were, however, not statistically significantly different from air  
394 pollution-associated risks among the active commuters.

395 Our findings are in accordance with a longitudinal cohort study on MI within the Danish Diet, Cancer,  
396 and Health cohort which found an increased benefit of participation in sports among individuals with  
397 high NO<sub>2</sub> concentration at the home addresses [16]. The reported risk reduction was 9, 15, and 24%  
398 respectively among individuals with low (<14.3 µg/m<sup>3</sup>), medium (14.3-21 µg/ m<sup>3</sup>) and high (>21 µg/ m<sup>3</sup>)  
399 residential NO<sub>2</sub> concentration. For walking and cycling they also estimated greater risk reductions for  
400 first incident MI among individuals with higher air pollution concentrations. In the same Danish cohort,  
401 the long term benefits of physical activity on CVD mortality were also found to be greater among  
402 individuals with high residential NO<sub>2</sub> [23]. The risk reduction associated with participation in cycling and  
403 gardening among individuals exposed to high residential NO<sub>2</sub> (≥ 19 µg/m<sup>3</sup>) was greater than those  
404 exposed to moderate/low NO<sub>2</sub> concentration (<19 µg/m<sup>3</sup>). Among participants exposed to high NO<sub>2</sub>, the  
405 risk reduction for cycling and gardening was 30% and 23%, respectively, whereas among participants  
406 exposed to low NO<sub>2</sub>, risk reduction was 17% and 15%, respectively. However, the interaction effects in  
407 these two studies were not statistically significant.

408 Opposite findings were observed for the modifying effect of physical activity on the association between  
409 air pollution and the incidence of diabetes [15]. Among the participants in the Danish cohort, the risk of  
410 developing diabetes increased by 10% per interquartile range of 4.9 mg/m<sup>3</sup> residential NO<sub>2</sub> among  
411 physically active individuals, but there was no difference among less physically active individuals. The  
412 authors considered that this may be due to an additive rather multiplicative interaction, thus resulting in  
413 an increased risk estimate only among physical active individuals with a low risk of developing diabetes.

414  
415  
416 As inflammation is a causative mechanism for cardiovascular disease, we hypothesized that the anti-  
417 inflammatory effects of physical activity may reduce air pollution-associated risks since inflammation is  
418 one among several different pathways for the harmful health effects of air pollution. The findings of  
419 greater benefits of physical activity among individuals with higher air pollution exposure for incident IHD

1  
2  
3 420 risk in our study and incident MI and CVD mortality in the Danish cohort, support such a hypothesis.  
4 421 However, a study on physical activity and white blood cell counts conducted in a large cohort of  
5 422 Taiwanese adults suggested no effect modification by residential air pollution measured as PM<sub>2.5</sub> [17].  
6 423 Both physical activity and residential air pollution were, however, found to be associated with an  
7 424 inflammatory response assessed by white blood cell counts. However, the association between physical  
8 425 activity and white blood cell count is variable because exercise also causes a transient increase in white  
9 426 blood cell count which usually normalises within 24 hours [24]. The results of our study cannot be  
10 427 directly compared with the above mentioned studies due to the difference in pollutants [15,16,23] and  
11 428 health outcomes [15,16,23]. This study contributes with air pollution effect estimates on IHD incidence  
12 429 in a population with a relatively low level of air pollution concentrations. Compared with the previous  
13 430 cohort studies on interaction effects between air pollution and physical activity, the annual mean PM<sub>2.5</sub>  
14 431 concentration was 3-4 times lower. The annual mean in the Taiwanese cohort was 27 µg/m<sup>3</sup> and a  
15 432 recent study within the same population as the DHC-cohort studies reported 18 µg/m<sup>3</sup>. Even at these  
16 433 lower levels of air pollution an increased risk associated with air pollution exposure was found, however  
17 434 not among those who exercised at least twice a week. Even though active commuting may result in  
18 435 higher air pollution exposure compared with for instance driving a car to work, the risk of an IHD event  
19 436 was still reduced since the benefit of the physical activity was greater than the IHD risk imposed by the  
20 437 air pollution exposure.  
21  
22  
23

24 438  
25 439 A major strength of our study is the air pollution particle concentration exposure data since particles are  
26 440 considered to be the causal component of air pollution [25]. The study used individual time varying  
27 441 exposures of annual mean concentrations during follow-up based on population address registries. The  
28 442 dispersion model used for modelling of particle concentrations has previously been validated [19].  
29 443 Within the DHC studies NO<sub>2</sub> was used as a proxy for traffic generated air pollution and was assessed only  
30 444 at residential addresses at the year of recruitment or as an annual mean during follow-up. A limitation  
31 445 of our exposure data is that the statistical power only allowed for two exposure categories and  
32 446 therefore no exposure-response assessment was performed.  
33  
34

35 447 Another strength of our study is the prospective design, the long follow-up period, the large cohort size  
36 448 and the availability of baseline data on several important confounders. A limitation is the lack of  
37 449 information on the intensity and duration of physical activity and therefore only frequency of exercise  
38 450 could be considered. The study also lacked information on changes in physical activity and other life-  
39 451 style factors during follow-up as the information was only retrieved at baseline.  
40

41 452 There is a risk of reverse causation if individuals at their baseline examination had a low physical activity  
42 453 level due to poorer health. Individuals could for instance have diseases that affect their risk to later in  
43 454 life have an IHD event (such as diabetes) prior to baseline examination. If this prior disease also affected  
44 455 the frequency the individual exercised in training clothes, or mode of commuting, then a reverse  
45 456 causation between physical activity and IHD risk may occur. Individuals with a prior IHD event at  
46 457 baseline were however excluded. Furthermore, we lacked information on whether exercise is taking  
47 458 place outdoors or indoors. For active commuters we also lack air pollution exposure calculations during  
48 459 the commute. This would cause exposure misclassification among active commuters with a higher in-  
49 460 traffic air pollution exposure dose compared with non-active commuters, causing a possible bias to the  
50 461 null. This would also occur if individuals chose not to exercise outside during times with high air  
51 462 pollution exposure.  
52  
53  
54

55 463  
56  
57  
58  
59  
60

## 5 Conclusion

The study estimated that exercise reduced the risk of first incident IHD, but only among individuals with higher residential particle concentrations (above median). Similarly, the harmful air pollution effect on IHD was only found among those who exercised less. Our results reinforce the public health message that physical activity is beneficial for cardiovascular health and thus support the adoption of strategies to improve health through promotion of physical activity and mitigation of air pollution. Further studies are needed to build on the evidence of physical activity and air pollution interactions on the incidence cardiovascular disease. Air pollution exposures during commuting should also be considered in these studies.

473

**Author's contributions:** All the authors contributed to the study conception and design. W.R. and J.N.S. analysed the data. W.R wrote the first draft of the manuscript. B.F., B.K. and J.N.S. critically revised the manuscript for important intellectual content. All authors read and approved the final version of the manuscript.

**Funding:** The study was funded by FORTE (Forskningsrådet för hälsa, arbetsliv och välfärd) [grant number 2012-1296], a Swedish state agency that finances scientific research in health, welfare, and working life, and by grants from Folksam research foundation and the Swedish state under the agreement between the Swedish government and the county councils (ALF) awarded B F [grant number: VLL-645781].

**Competing interests:** None.

**Participants consent:** Obtained.

**Ethics approval:** The study was approved by the Regional Ethics Review Board at Umea University (DNR: 2014-136-32M and 2015/16-31Ö).

**Data availability:** No additional data is available

487

488

489

490

491 **6 References**

- 492
- 493 1 Lelieveld J, Klingmüller K, Pozzer A, *et al.* Cardiovascular disease burden from ambient air  
494 pollution in Europe reassessed using novel hazard ratio functions. *Eur Heart J* Published Online  
495 First: 2019. doi:10.1093/eurheartj/ehz135
- 496 2 Shrivastava AK, Singh HV, Raizada A, *et al.* C-reactive protein, inflammation and coronary heart  
497 disease. *Egypt. Hear. J.* 2015. doi:10.1016/j.ehj.2014.11.005
- 498 3 Cohen AJ, Brauer M, Burnett R, *et al.* Estimates and 25-year trends of the global burden of  
499 disease attributable to ambient air pollution: an analysis of data from the Global Burden of  
500 Diseases Study 2015. *Lancet* Published Online First: 2017. doi:10.1016/S0140-6736(17)30505-6
- 501 4 Münzel T, Gori T, Al-Kindi S, *et al.* Effects of gaseous and solid constituents of air pollution on  
502 endothelial function. *Eur. Heart J.* 2018. doi:10.1093/eurheartj/ehy481
- 503 5 Brook RD, Rajagopalan S, Pope CA, *et al.* Particulate matter air pollution and cardiovascular  
504 disease: An update to the scientific statement from the American Heart Association. *Circulation*  
505 Published Online First: 2010. doi:10.1161/CIR.0b013e3181d8e1
- 506 6 Stevens G. Global Health Risks: Mortality and burden of disease attributable to selected major  
507 risks. *World Heal. Organ.* 2009;**87**:646–646. doi:10.2471/BLT.09.070565
- 508 7 Lee I, Shiroma EJ, Lobelo F, *et al.* Impact of Physical Inactivity on the World's Major Non-  
509 Communicable Diseases. *Lancet* Published Online First: 2012. doi:10.1016/S0140-6736(12)61031-  
510 9
- 511 8 Nimmo MA, Leggate M, Viana JL, *et al.* The effect of physical activity on mediators of  
512 inflammation. *Diabetes, Obes. Metab.* 2013. doi:10.1111/dom.12156
- 513 9 Petersen AMW, Pedersen BK. The anti-inflammatory effect of exercise. *J Appl Physiol* Published  
514 Online First: 2005. doi:10.1152/jappphysiol.00164.2004
- 515 10 Rajé F, Tight M, Pope FD. Traffic pollution: A search for solutions for a city like Nairobi. *Cities*  
516 Published Online First: 2018. doi:10.1016/j.cities.2018.05.008
- 517 11 Rojas-Rueda D, De Nazelle A, Teixidó O, *et al.* Health impact assessment of increasing public  
518 transport and cycling use in Barcelona: a morbidity and burden of disease approach. *Prev Med*  
519 (*Baltim*) 2013;**57**:573–9.
- 520 12 Maizlish N, Woodcock J, Co S, *et al.* Health cobenefits and transportation-related reductions in  
521 greenhouse gas emissions in the San Francisco Bay area. *Am J Public Health* 2013;**103**:703–9.
- 522 13 Tainio M, de Nazelle AJ, Götschi T, *et al.* Can air pollution negate the health benefits of cycling  
523 and walking? *Prev Med (Baltim)* Published Online First: 2015. doi:10.1016/j.ympmed.2016.02.002
- 524 14 Giles L V., Koehle MS. The health effects of exercising in air pollution. *Sport. Med.* 2014.  
525 doi:10.1007/s40279-013-0108-z
- 526 15 Andersen ZJ, Raaschou-Nielsen O, Ketznel M, *et al.* Diabetes incidence and long-term exposure to  
527 air pollution: A cohort study. *Diabetes Care* Published Online First: 2012. doi:10.2337/dc11-1155

- 1  
2  
3 528 16 Kubesch NJ, Jørgensen JT, Hoffmann B, *et al.* Effects of leisure-time and transport-related  
4 529 physical activities on the risk of incident and recurrent myocardial infarction and interaction with  
5 530 traffic-related air pollution: A cohort study. *J Am Heart Assoc* Published Online First: 2018.  
6 531 doi:10.1161/JAHA.118.009554  
7  
8 532 17 Zhang Z, Hoek G, Chang L yun, *et al.* Particulate matter air pollution, physical activity and  
9 533 systemic inflammation in Taiwanese adults. *Int J Hyg Environ Health* Published Online First: 2018.  
10 534 doi:10.1016/j.ijheh.2017.10.001  
11  
12 535 18 Norberg M, Wall S, Boman K, *et al.* The Västerbotten Intervention Programme: background,  
13 536 design and implications. *Glob Health Action* Published Online First: 2010.  
14 537 doi:10.3402/gha.v3i0.4643  
15  
16 538 19 Segersson D, Eneroth K, Gidhagen L, *et al.* **Health impact of PM10, PM2.5 and black carbon**  
17 539 **exposure due to different source sectors in Stockholm, Gothenburg and Umea, Sweden.** *Int J*  
18 540 *Environ Res Public Health* Published Online First: 2017. doi:10.3390/ijerph14070742  
19  
20 541 20 Hausberger S, Rexeis M, Zallinger M, *et al.* Emission Factors from the Model PHEM for the HBEFA  
21 542 Version 3. 2009.  
22  
23 543 21 Omstedt G, Bringfelt B, Johansson C. A model for vehicle-induced non-tailpipe emissions of  
24 544 particles along Swedish roads. *Atmos Environ* Published Online First: 2005.  
25 545 doi:10.1016/j.atmosenv.2005.06.037  
26  
27 546 22 SMHI. Airviro technical specification, appendix E. 2010.  
28 547 <http://www.smhi.se/airviro/2.867/specification/>  
29  
30 548 23 Andersen ZJ, de Nazelle A, Mendez MA, *et al.* A study of the combined effects of physical activity  
31 549 and air pollution on mortality in elderly urban residents: The Danish Diet, Cancer, and Health  
32 550 Cohort. *Environ Health Perspect* 2015.  
33  
34 551 24 Abramson N, Melton B. Leukocytosis: Basics of clinical assessment. *Am. Fam. Physician.* 2000.  
35  
36 552 25 World Health Organization. Review of evidence on health aspects of air pollution – REVIHAAP  
37 553 Project: Technical Report. 2013. doi:10.1007/BF00379640  
38  
39 554  
40  
41 555  
42  
43  
44  
45  
46  
47  
48  
49  
50  
51  
52  
53  
54  
55  
56  
57  
58  
59

**A: Sensitivity analysis by excluding the individuals with follow-up time below the 25th percentile**

Table 1. Hazard ratios (95% CI) for IHD associated with different exercise and commuting habits among persons with different air pollution exposure at home addresses.

| Exercise in training clothes | Overall model with no interaction effects | Adjusted <sup>a</sup> HRs in categories of high and low particle exposure |                                     | Adjusted <sup>a</sup> interaction hazard ratio                          |
|------------------------------|-------------------------------------------|---------------------------------------------------------------------------|-------------------------------------|-------------------------------------------------------------------------|
|                              |                                           | Low PM <sub>10</sub> <sup>b</sup>                                         | High PM <sub>10</sub> <sup>b</sup>  |                                                                         |
|                              |                                           | Low PM <sub>10</sub> <sup>b</sup>                                         | High PM <sub>10</sub> <sup>b</sup>  | Benefits of exercise/commuting comparing high and low particle exposure |
| Never                        | 1                                         | 1                                                                         | 1                                   |                                                                         |
| ≤ once/week                  | 1.00 (0.84-1.19)                          | 1.01 (0.84-1.21)                                                          | 1.02 (0.85-1.23)                    | 1.02 (0.79-1.31)                                                        |
| ≥ twice/week                 | 0.88 (0.76-1.02)                          | 1.0 (0.77-1.31)                                                           | 0.48 (0.34-0.7)                     | 0.48 (0.31-0.76)                                                        |
|                              |                                           | Low PM <sub>2.5</sub> <sup>c</sup>                                        | High PM <sub>2.5</sub> <sup>c</sup> |                                                                         |
| Never                        | 1                                         | 1                                                                         | 1                                   |                                                                         |
| ≤ once/week                  |                                           | 1.01 (0.84-1.21)                                                          | 1.02 (0.85-1.23)                    | 1.01 (0.78-1.31)                                                        |
| ≥ twice/week                 |                                           | 0.95 (0.72-1.24)                                                          | 0.53 (0.37-0.75)                    | 0.56 (0.36-0.87)                                                        |
| Active commuting per season  |                                           | Low PM <sub>10</sub> <sup>b</sup>                                         | High PM <sub>10</sub> <sup>b</sup>  |                                                                         |
| Non-active commuting         | 1                                         | 1                                                                         | 1                                   |                                                                         |
| ≤ two seasons of four        | 1.02 (0.89-1.16)                          | 1.16 (0.92-1.46)                                                          | 0.85 (0.66-1.09)                    | 0.73 (0.52-1.03)                                                        |
| > two seasons of four        | 0.74 (0.6-0.92)                           | 0.91 (0.74-1.12)                                                          | 0.83 (0.68-1.02)                    | 0.91 (0.69-1.2)                                                         |
|                              |                                           | Low PM <sub>2.5</sub> <sup>c</sup>                                        | High PM <sub>2.5</sub> <sup>c</sup> |                                                                         |
| Non-active commuting         |                                           | 1                                                                         | 1                                   |                                                                         |
| ≤ two seasons of four        |                                           | 1.18 (0.93-1.48)                                                          | 0.84 (0.65-1.08)                    | 0.70 (0.50-0.98)                                                        |
| > two seasons of four        |                                           | 0.98 (0.80-1.2)                                                           | 0.79 (0.64-0.96)                    | 0.82 (0.62-1.09)                                                        |

<sup>a</sup>Adjusted for sex, calendar year, education, smoking, alcohol intake, occupation, neighbourhood mean income, leisure time physical activity, active commuting

<sup>b</sup>Low PM<sub>10</sub>: ≤9.6 µg/m<sup>3</sup>; High PM<sub>10</sub>: >9.6 µg/m<sup>3</sup>

<sup>c</sup>Low PM<sub>2.5</sub> ≤5.7 µg/m<sup>3</sup>; High PM<sub>2.5</sub>: >5.7 µg/m<sup>3</sup>

Table 2. Hazard ratios (95% CI) for IHD associated with high air pollution levels (vs low) at home address among persons with different exercise/commuting habits.

|                                     | Overall model with No interaction effects | Adjusted <sup>a</sup> HRs in different exercise categories |                       |                       |
|-------------------------------------|-------------------------------------------|------------------------------------------------------------|-----------------------|-----------------------|
|                                     |                                           | Exercise in training clothes                               |                       |                       |
|                                     |                                           | Never                                                      | ≤ once/week           | ≥ twice/week          |
| Low PM <sub>10</sub> <sup>b</sup>   | 1                                         | 1                                                          | 1                     | 1                     |
| High PM <sub>10</sub> <sup>b</sup>  | 1.22 (0.96-1.56)                          | 1.25 (1.0-1.56)                                            | 1.27 (1.03-1.58)      | 0.61 (0.40-0.93)      |
| Low PM <sub>2.5</sub> <sup>c</sup>  | 1                                         | 1                                                          | 1                     | 1                     |
| High PM <sub>2.5</sub> <sup>c</sup> | 0.95 (0.74-1.21)                          | 1.15 (0.92-1.43)                                           | 1.16 (0.94-1.44)      | 0.64 (0.42-0.97)      |
|                                     |                                           | Active commuting                                           |                       |                       |
|                                     |                                           | Non-active commuting                                       | ≤ two seasons of four | > two seasons of four |
| Low PM <sub>10</sub> <sup>b</sup>   |                                           | 1                                                          | 1                     | 1                     |
| High PM <sub>10</sub> <sup>b</sup>  |                                           | 1.28 (1.04-1.57)                                           | 0.94 (0.68-1.29)      | 1.16 (0.9-1.5)        |
| Low PM <sub>2.5</sub> <sup>c</sup>  |                                           | 1                                                          | 1                     | 1                     |
| High PM <sub>2.5</sub> <sup>c</sup> |                                           | 1.23 (1.0-1.51)                                            | 0.88 (0.64-1.21)      | 0.99 (0.76-1.27)      |

<sup>a</sup>Adjusted for sex, calendar year, education, smoking, alcohol intake, occupation, neighbourhood mean income, leisure time physical activity, active commuting

<sup>b</sup>Low PM<sub>10</sub>: ≤9.6 µg/m<sup>3</sup>; High PM<sub>10</sub>: >9.6 µg/m<sup>3</sup>

<sup>c</sup>Low PM<sub>2.5</sub> ≤5.7 µg/m<sup>3</sup>; High PM<sub>2.5</sub>: >5.7 µg/m<sup>3</sup>



B1: Distributions of PM10 and PM2.5 moving averages (lag 1-5) for the person-years included in the study

Figure 1: PM10 distribution

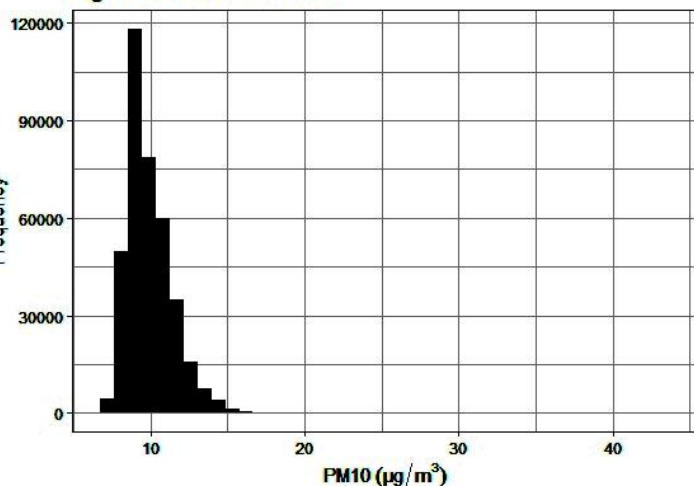

Figure 2: PM2.5 distribution

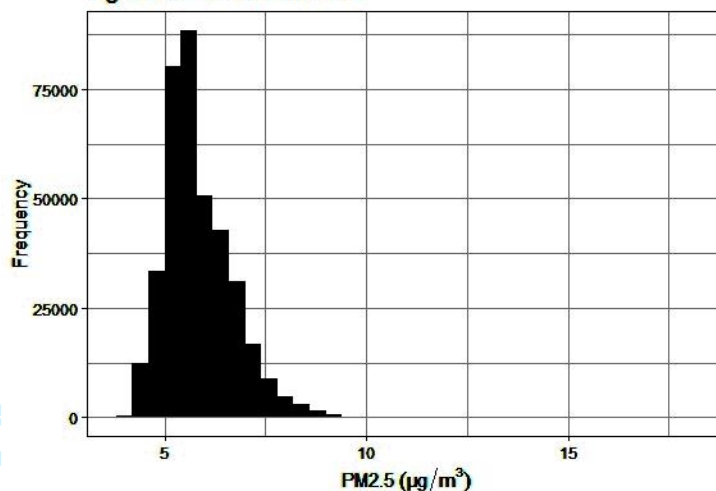

B2: Distributions of PM10 and PM2.5 moving averages (lag 1-5) for the person-years included in the study at different levels of physical activity (exercise in training clothes).

Figure 3: PM10 at different levels of exercise

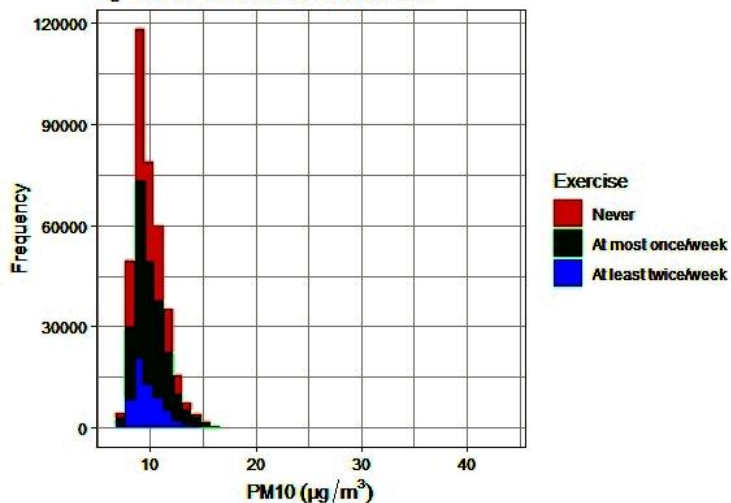

Figure 4: PM2.5 at different levels of exercise

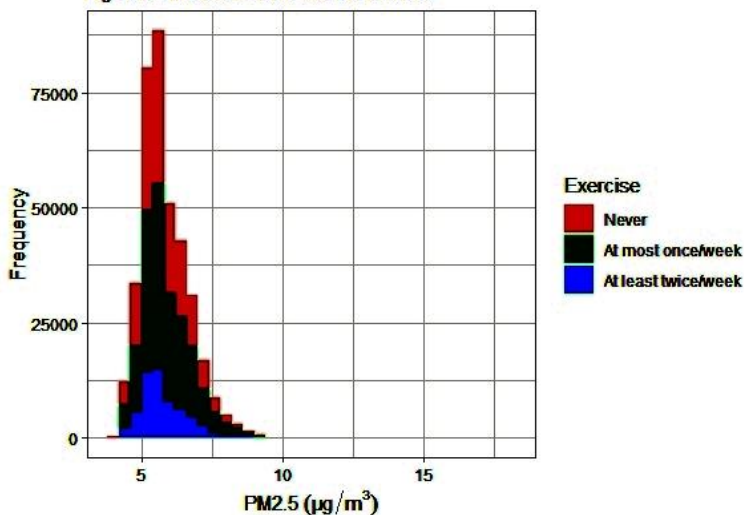

1  
2  
3  
4  
5  
6  
7  
8  
9  
10  
11  
12  
13  
14  
15  
16  
17  
18  
19  
20  
21  
22  
23  
24  
25  
26  
27  
28  
29  
30  
31  
32  
33  
34  
35  
36  
37  
38  
39  
40  
41  
42  
43  
44  
45  
46  
47  
48  
49  
50  
51  
52  
53  
54  
55  
56  
57  
58  
59  
60

For peer review only

**STROBE 2007 (v4) Statement—Checklist of items that should be included in reports of *cohort studies***

| Section/Topic                | Item # | Recommendation                                                                                                                                                                       | Reported on page # |
|------------------------------|--------|--------------------------------------------------------------------------------------------------------------------------------------------------------------------------------------|--------------------|
| <b>Title and abstract</b>    | 1      | (a) Indicate the study's design with a commonly used term in the title or the abstract                                                                                               | 1                  |
|                              |        | (b) Provide in the abstract an informative and balanced summary of what was done and what was found                                                                                  | 2                  |
| <b>Introduction</b>          |        |                                                                                                                                                                                      |                    |
| Background/rationale         | 2      | Explain the scientific background and rationale for the investigation being reported                                                                                                 | 4                  |
| Objectives                   | 3      | State specific objectives, including any prespecified hypotheses                                                                                                                     | 4                  |
| <b>Methods</b>               |        |                                                                                                                                                                                      |                    |
| Study design                 | 4      | Present key elements of study design early in the paper                                                                                                                              | 5                  |
| Setting                      | 5      | Describe the setting, locations, and relevant dates, including periods of recruitment, exposure, follow-up, and data collection                                                      | 5                  |
| Participants                 | 6      | (a) Give the eligibility criteria, and the sources and methods of selection of participants. Describe methods of follow-up                                                           | 5                  |
|                              |        | (b) For matched studies, give matching criteria and number of exposed and unexposed                                                                                                  |                    |
| Variables                    | 7      | Clearly define all outcomes, exposures, predictors, potential confounders, and effect modifiers. Give diagnostic criteria, if applicable                                             | 5-6                |
| Data sources/<br>measurement | 8*     | For each variable of interest, give sources of data and details of methods of assessment (measurement). Describe comparability of assessment methods if there is more than one group | 5-6                |
| Bias                         | 9      | Describe any efforts to address potential sources of bias                                                                                                                            | 6                  |
| Study size                   | 10     | Explain how the study size was arrived at                                                                                                                                            | 5                  |
| Quantitative variables       | 11     | Explain how quantitative variables were handled in the analyses. If applicable, describe which groupings were chosen and why                                                         | 5-6                |
| Statistical methods          | 12     | (a) Describe all statistical methods, including those used to control for confounding                                                                                                | 7                  |
|                              |        | (b) Describe any methods used to examine subgroups and interactions                                                                                                                  | 7                  |
|                              |        | (c) Explain how missing data were addressed                                                                                                                                          | 5                  |
|                              |        | (d) If applicable, explain how loss to follow-up was addressed                                                                                                                       | 7                  |
|                              |        | (e) Describe any sensitivity analyses                                                                                                                                                |                    |
| <b>Results</b>               |        |                                                                                                                                                                                      |                    |

|                          |     |                                                                                                                                                                                                              |       |
|--------------------------|-----|--------------------------------------------------------------------------------------------------------------------------------------------------------------------------------------------------------------|-------|
| Participants             | 13* | (a) Report numbers of individuals at each stage of study—eg numbers potentially eligible, examined for eligibility, confirmed eligible, included in the study, completing follow-up, and analysed            | 5     |
|                          |     | (b) Give reasons for non-participation at each stage                                                                                                                                                         | 5     |
|                          |     | (c) Consider use of a flow diagram                                                                                                                                                                           |       |
| Descriptive data         | 14* | (a) Give characteristics of study participants (eg demographic, clinical, social) and information on exposures and potential confounders                                                                     | 7     |
|                          |     | (b) Indicate number of participants with missing data for each variable of interest                                                                                                                          | 8     |
|                          |     | (c) Summarise follow-up time (eg, average and total amount)                                                                                                                                                  | 7     |
| Outcome data             | 15* | Report numbers of outcome events or summary measures over time                                                                                                                                               | 7     |
| Main results             | 16  | (a) Give unadjusted estimates and, if applicable, confounder-adjusted estimates and their precision (eg, 95% confidence interval). Make clear which confounders were adjusted for and why they were included | 8-11  |
|                          |     | (b) Report category boundaries when continuous variables were categorized                                                                                                                                    | 9, 11 |
|                          |     | (c) If relevant, consider translating estimates of relative risk into absolute risk for a meaningful time period                                                                                             |       |
| Other analyses           | 17  | Report other analyses done—eg analyses of subgroups and interactions, and sensitivity analyses                                                                                                               | 9-11  |
| <b>Discussion</b>        |     |                                                                                                                                                                                                              |       |
| Key results              | 18  | Summarise key results with reference to study objectives                                                                                                                                                     | 12    |
| <b>Limitations</b>       |     |                                                                                                                                                                                                              |       |
| Interpretation           | 20  | Give a cautious overall interpretation of results considering objectives, limitations, multiplicity of analyses, results from similar studies, and other relevant evidence                                   | 12-13 |
| Generalisability         | 21  | Discuss the generalisability (external validity) of the study results                                                                                                                                        | 13    |
| <b>Other information</b> |     |                                                                                                                                                                                                              |       |
| Funding                  | 22  | Give the source of funding and the role of the funders for the present study and, if applicable, for the original study on which the present article is based                                                | 14    |

\*Give information separately for cases and controls in case-control studies and, if applicable, for exposed and unexposed groups in cohort and cross-sectional studies.

**Note:** An Explanation and Elaboration article discusses each checklist item and gives methodological background and published examples of transparent reporting. The STROBE checklist is best used in conjunction with this article (freely available on the Web sites of PLoS Medicine at <http://www.plosmedicine.org/>, Annals of Internal Medicine at <http://www.annals.org/>, and Epidemiology at <http://www.epidem.com/>). Information on the STROBE Initiative is available at [www.strobe-statement.org](http://www.strobe-statement.org).

# BMJ Open

## Air pollution, physical activity and ischemic heart disease - A prospective cohort study of interaction effects

|                                 |                                                                                                                                                                                                                                                                                                                                                                                                                                                                         |
|---------------------------------|-------------------------------------------------------------------------------------------------------------------------------------------------------------------------------------------------------------------------------------------------------------------------------------------------------------------------------------------------------------------------------------------------------------------------------------------------------------------------|
| Journal:                        | <i>BMJ Open</i>                                                                                                                                                                                                                                                                                                                                                                                                                                                         |
| Manuscript ID                   | bmjopen-2020-040912.R2                                                                                                                                                                                                                                                                                                                                                                                                                                                  |
| Article Type:                   | Original research                                                                                                                                                                                                                                                                                                                                                                                                                                                       |
| Date Submitted by the Author:   | 21-Mar-2021                                                                                                                                                                                                                                                                                                                                                                                                                                                             |
| Complete List of Authors:       | Raza, Wasif; Umeå Universitet Medicinska fakulteten, Public Health and Clinical Medicine, Sustainable Health<br>Krachler, Benno; Umeå Universitet Medicinska fakulteten, Public Health and Clinical Medicine, Sustainable Health<br>Forsberg, Bertil; Umeå Universitet Medicinska fakulteten, Public Health and Clinical Medicine, Sustainable health<br>Sommar, Johan; Umeå Universitet Medicinska fakulteten, Public Health and Clinical Medicine, Sustainable health |
| <b>Primary Subject Heading</b>: | Public health                                                                                                                                                                                                                                                                                                                                                                                                                                                           |
| Secondary Subject Heading:      | Epidemiology                                                                                                                                                                                                                                                                                                                                                                                                                                                            |
| Keywords:                       | Ischaemic heart disease < CARDIOLOGY, PUBLIC HEALTH, Coronary heart disease < CARDIOLOGY                                                                                                                                                                                                                                                                                                                                                                                |
|                                 |                                                                                                                                                                                                                                                                                                                                                                                                                                                                         |

SCHOLARONE™  
Manuscripts

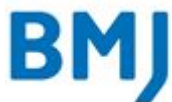

I, the Submitting Author has the right to grant and does grant on behalf of all authors of the Work (as defined in the below author licence), an exclusive licence and/or a non-exclusive licence for contributions from authors who are: i) UK Crown employees; ii) where BMJ has agreed a CC-BY licence shall apply, and/or iii) in accordance with the terms applicable for US Federal Government officers or employees acting as part of their official duties; on a worldwide, perpetual, irrevocable, royalty-free basis to BMJ Publishing Group Ltd ("BMJ") its licensees and where the relevant Journal is co-owned by BMJ to the co-owners of the Journal, to publish the Work in this journal and any other BMJ products and to exploit all rights, as set out in our [licence](#).

The Submitting Author accepts and understands that any supply made under these terms is made by BMJ to the Submitting Author unless you are acting as an employee on behalf of your employer or a postgraduate student of an affiliated institution which is paying any applicable article publishing charge ("APC") for Open Access articles. Where the Submitting Author wishes to make the Work available on an Open Access basis (and intends to pay the relevant APC), the terms of reuse of such Open Access shall be governed by a Creative Commons licence – details of these licences and which [Creative Commons](#) licence will apply to this Work are set out in our licence referred to above.

Other than as permitted in any relevant BMJ Author's Self Archiving Policies, I confirm this Work has not been accepted for publication elsewhere, is not being considered for publication elsewhere and does not duplicate material already published. I confirm all authors consent to publication of this Work and authorise the granting of this licence.

# Air pollution, physical activity and ischemic heart disease - A prospective cohort study of interaction effects

Wasif Raza <sup>1,\*</sup>, Benno Krachler <sup>1</sup>, Bertil Forsberg <sup>1</sup> and Johan Nilsson Sommar <sup>1</sup>

<sup>1</sup>Department of Public Health and Clinical Medicine, Section of Sustainable Health, Umeå University, Sweden; [wasif.raza@umu.se](mailto:wasif.raza@umu.se) (W.R.); [benno.krachler@umu.se](mailto:benno.krachler@umu.se) (B.K.); [bertil.forsberg@umu.se](mailto:bertil.forsberg@umu.se) (B.F.); [johan.sommar@umu.se](mailto:johan.sommar@umu.se) (J.N.S.)

\* Correspondence: [wasif.raza@umu.se](mailto:wasif.raza@umu.se) ; Tel.: +46-72-289-5144

For peer review only

30

## 31 Abstract

32 **Objective:** To assess a possible interaction effect between physical activity and air pollution on first  
33 incidence of ischemic heart disease (IHD).

34 **Design:** Prospective cohort study

35 **Setting:** Umeå, Northern Sweden

36 **Participants:** We studied 34,748 adult participants of Västerbotten Intervention Programme cohort  
37 from 1990 to January 2014. Annual particulate matter concentrations (PM<sub>2.5</sub> and PM<sub>10</sub>) at the  
38 participants' residential addresses were modelled and a questionnaire on frequency of exercise and  
39 active commuting was completed at baseline. Cox proportional hazards modelling was used to estimate  
40 1) association with physical activity at different levels of air pollution, and 2) the association with  
41 particulate matter at different levels of physical activity.

42 **Outcome:** First incidence of IHD.

43 **Results:** Over a mean follow-up of 12.4 years, there were 1,148 IHD cases. Overall, we observed an  
44 increased risk of IHD among individuals with higher concentrations of particles at their home address.  
45 Exercise at least twice a week was associated with a lower risk of IHD among participants with high  
46 residential PM<sub>2.5</sub> (0.60; 95% CI: 0.44-0.82) and PM<sub>10</sub> (0.55; 95% CI: 0.4-0.76). The same beneficial effect  
47 was not observed with low residential PM<sub>2.5</sub> (0.94; 95% CI: 0.72-1.22) and PM<sub>10</sub> (0.99; 95% CI: 0.76-1.29).  
48 An increased risk associated with higher long-term exposure to particles was only observed among  
49 participants never exercising in training clothes and among those not performing any active commuting.  
50 However, only the interaction effect on hazard ratios for exercise was statistically significant.

51 **Conclusion:** Exercise was associated with a lower risk of first incidence of IHD among individuals with  
52 higher residential particle concentrations. An air pollution-associated risk was only observed among  
53 those who exercised less. The findings support the promotion of physical activity and a mitigation of air  
54 pollution.

55

56 **Key Words:** Air pollution, PM<sub>2.5</sub>, PM<sub>10</sub>, exercise, interaction, ischemic heart disease

57

58

59

60

61

62



63

## Strengths and limitations of this study

65

- 66 • This study simultaneously evaluated the impact of physical activity and air pollution and their  
67 interaction on first incident IHD cases in a population with relatively low level of air pollution  
68 concentrations.
- 69 • For air pollution exposure, this study used individual time varying exposures of annual mean  
70 concentrations during follow-up based on population address registries.
- 71 • Another strength is the prospective design and the availability of baseline data on several  
72 important confounders.
- 73 • No exposure-response assessment could be performed since the statistical power only allowed  
74 for the formation of two exposure categories.
- 75 • Differences in air pollution exposure during active commuting might cause biased estimates due  
76 to exposure misclassification.

77

78

79

80

81

82

83

84

85

86

87

88

89

90

91

92

93

94

95

96

97

98

99

100

101

102

103

# 1 Introduction

Cardiovascular disease (CVD) is the most important cause of morbidity and premature mortality worldwide, accounting for 422.3 million cases and 17.92 million deaths in 2015 [1]. There is solid evidence that inflammation is a key upstream pathogenic mechanism [2]. Ambient air pollution, generally comprising ozone, sulphur dioxide, nitrogen dioxide and particulate matter (PM), is a leading contributor to the global burden of disease and an important risk factor for morbidity and mortality. Particulate matter is often measured as PM<sub>2.5</sub>, to represent particles with a diameter of 2.5 micrometres or less, and PM<sub>10</sub>, to represent particles with a diameter of 10 micrometres or less. Ambient PM<sub>2.5</sub> exposure alone has been estimated to account for 4.2 million deaths in 2015, of which 1.5 million deaths were caused by ischemic heart diseases (IHD) [3]. The underlying mechanisms mediating the pathogenic impact of air pollution involve systemic oxidative stress and inflammation [4,5]. Physical activity is a salutogenic factor in numerous non-communicable chronic diseases (NCDs), with physical inactivity being responsible for 6% of the burden of disease from coronary heart disease [6,7]. The beneficial effects of physical activity include protection against low-grade inflammation by releasing anti-inflammatory substances, such as interleukin 6, from contracting muscles [8,9].

Rapid urbanization and increased use of motorized transport contribute to modern day problems such as traffic congestion, traffic related air pollution and lack of physical activity. Promotion of active transportation by changing mode of transport from car to cycling and walking are among the different strategies used to tackle these challenges [10–12]. As inflammation is a causative mechanism for cardiovascular disease, it is conceivable that the anti-inflammatory effects of physical activity may mitigate the harmful effects associated with exposure to air pollution. However, one major concern with physical activity in a polluted environment is the increased inhalation of particles due to an increase in respiratory volume that may counteract the beneficial effects of physical activity [13,14].

The long-term effects of air pollution among individuals with different levels of leisure time physical activity have been estimated within the Danish Diet, Cancer, and Health cohort. The incidence of diabetes was assessed in relation to leisure time physical activity and nitrogen dioxide (NO<sub>2</sub>) concentration at the home address. Residential NO<sub>2</sub> was found to be associated with increased incidence of diabetes, but only among physically active individuals [15]. As far as we know, only one study has examined the modifying effect of air pollution on the association between physical activity and cardiovascular disease. In their recent study, Kubesch and colleagues conclude that physical activity reduced the risk of first incidence of myocardial infarction (MI) and recurrent MI among individuals with high NO<sub>2</sub> concentration at the residential addresses [16]. As only one pollutant (NO<sub>2</sub>) and only one cardiovascular outcome (MI) have been studied, the knowledge of a possible interaction between air pollution and physical activity on CVD is inconclusive.

A Taiwanese study found an independent inverse association of habitual physical activity with inflammation across different levels of PM<sub>2.5</sub> exposure, although long term exposure was associated with increased inflammation at all levels of physical activity [17].

We therefore aimed to examine interaction effects between physical activity and long-term exposure to PM<sub>2.5</sub> and PM<sub>10</sub> at residential addresses on the incidence of ischemic heart disease (IHD). We wanted to assess: 1) whether air pollution modifies the beneficial effects of physical activity on IHD, and 2) whether physical activity modifies the harmful effects of air pollution on IHD.

## 2 Methods

To determine the interaction effect between air pollution and physical activity on IHD incidence, we combined cohort data which comprised risk factors for IHD, national registry data on IHD incidence from the Swedish National Board of Health and Welfare, and yearly annual mean air pollution particle concentrations at the individuals' residential addresses using dispersion models from the Swedish Clean Air and Climate Research Program (SCAC).

VIP (Västerbotten Intervention Programme) is a population based screening and prospective cohort study, developed to reduce the risk of future CVD and diabetes by promoting a healthy lifestyle among individuals living in the Västerbotten region. The SCAC developed methods to estimate exposure to source-specific particulate matter such as PM<sub>2.5</sub> and PM<sub>10</sub> and at residential addresses in Gothenburg, Stockholm and Umeå.

### 2.1 Study population

VIP is an ongoing population-based health investigation survey of all individuals at ages 40, 50 or 60 years, depending upon risk factors, living in the Västerbotten region, who are invited to participate in systematic risk factor screening and individual counselling about healthy lifestyle habits. A detailed description of VIP has been presented elsewhere [18]. Between 1990 and 2014, a total of 42,488 of the VIP participants that lived in Umeå Municipality during the study period were included in the analysis. After exclusion of 7,740 participants with missing information on exercise, the study sample thus consisted of 34,748 individuals, 53% men and 47% women, 40-60 years of age at baseline examination, with no previous history of IHD at time of enrolment. After exclusion of individuals with missing information on included confounders the final number of included individuals were 31424 and 29218 for the analyses of exercise in training clothes and active commuting, respectively. All participants in the VIP gave their informed written consent, and the study was approved by the Regional Ethics Review Board at Umea University (DNR: 2014-136-32M and 2015/16-31Ö).

### 2.2 Leisure time exercise and active commuting

The VIP questionnaire includes various self-reported information on physical activity including frequency of leisure time physical activity and active commuting (cycling or walking to and from work). The association with IHD was assessed in relation to frequency of exercise in training clothes and amounts of active commuting. Exercise during the previous three months was categorized as never, rarely, once per week, 2-3 times per week or more than 3 times per week. Based on this information, participants were categorized as "Twice per week or more" if they exercised with a frequency of 2-3 times per week and more, "At most once a week" if they exercised rarely or once per week, and "Never" if no activity was performed. For active commuting, participants were asked about their mode of transport to work each season. Participants were classified in three categories: "Non- active commuting" if commuting every season by car or bus, "At most two seasons out of four" if cycling or walking at most half a year and "More than two seasons out of four", if cycling and walking more than half a year.

### 193 2.3 Covariates

194  
195 The VIP questionnaire also gathered information on participants' educational status, occupation,  
196 smoking, alcohol intake and economic status. Education was defined according to the International  
197 Standard Classification of Education (ISCED), United Nations Educational, Scientific and Cultural  
198 Organization (UNESCO) 1997. Participants were asked about the highest level education they had  
199 achieved with eight predefined categories ranging from "pre-school" to "university education." Alcohol  
200 intake was assessed by the reported frequency of consumption with answering options that ranged  
201 from "Never" to "2-4 times/week." Information on smoking was gathered by using the question, "How  
202 often do you smoke?" Information on occupational status was obtained with a question, "What kind of  
203 job do you have nowadays?" with the answering options of eight predefined categories. Finally,  
204 information on occupation status was asked with the question, "What is your current occupation?" with  
205 8 categories ranging from permanently employed to retired.

### 207 2.4 Air pollution concentrations

208  
209 Annual mean total concentrations of PM<sub>2.5</sub> and PM<sub>10</sub> for the years 1990-2011 (and thereafter linearly  
210 extrapolated up until year 2014) were obtained from the SCAC research program, described in detail  
211 elsewhere [19]. Briefly, concentrations of PM<sub>2.5</sub> and PM<sub>10</sub> were estimated within SCAC by applying  
212 dispersion models on local or regional emission inventories. These emission inventories contain detailed  
213 information on emissions from different source categories, such as road traffic exhaust, road traffic non-  
214 exhaust, domestic heating, shipping and industrial activities. For Umeå, inventories were validated  
215 through monitoring for consistency. Emissions from small-scale residential heating were assessed using  
216 registry data from chimney sweepers that included the type of wood stove or boiler. The addresses of  
217 these residences were geocoded using the geographical centre coordinate of the estate. Road traffic  
218 emission factors for PM exhaust for different vehicle types, speeds and driving conditions were  
219 calculated based on the Handbook Emission Factors for Road Transport (HBEFA) version 3.1 [20].  
220 Estimates for non-exhaust contribution from brake and tire wear were based on Omstedt et al. [21]. The  
221 annual average emission from shipping was used in the modelling on a 1x1 km<sup>2</sup> grid resolution. The  
222 emissions from other sources such as industrial processes, off-road machinery and agriculture was  
223 collected from Swedish Meteorological and Hydrological Institute (SMHI). To obtain annual average  
224 emissions of PM<sub>2.5</sub> and PM<sub>10</sub>, Gaussian models included in the Airviro air quality management system  
225 (SMHI, 2010) were used for simulation based on hourly meteorological data for 1990, 2000 and 2011  
226 [22]. The comparison between measured and modelled PM<sub>2.5</sub> and PM<sub>10</sub> agreed well at most monitoring  
227 stations ( $r^2=0.87$  and  $r^2=0.65$ , respectively).

### 229 2.5 Outcome

230  
231 We linked the records in VIP and through the unique Swedish personal identification number with data  
232 on first IHD event cases from the National Patient Register and the Cause of Death Register, both at the  
233 National Board of Health and Welfare, using primary discharge diagnoses for IHD according to  
234 International Classification of Diseases, 10th revision (ICD-10): code I20-125.

235

## 2.6 Patient and public involvement

No patients were involved in this study.

## 2.7 Statistical Analysis

We performed survival analyses using Cox regression proportion hazard model to estimate hazard ratios (HRs), and 95% confidence intervals (CIs), to estimate 1) the association between first incident IHD and air pollution exposure at different levels of physical activity and 2) the association between first incident IHD and physical activity at different levels of air pollution exposure. Age was used as the underlying timescale since it is a stronger confounder than calendar time. Follow-up started at date of recruitment to the cohort and ended with the earliest of the date of first IHD case, emigration, death, or 31 December 2013. Interaction between physical activity and air pollution and their impact on IHD was studied by introducing an interaction term into the model. Residential annual mean particle concentrations were used to calculate moving averages over the recent five years which were thereafter categorized as below or above the median concentration for PM<sub>2.5</sub> and PM<sub>10</sub>, respectively. Sensitivity analyses were also performed with PM concentrations categorized by tertiles. Interaction with physical activity was assessed based on 1) the frequency of exercise in training clothes and 2) the number of seasons the individual walked or cycled to work. Active commuting by walking or cycling was categorized into three groups: non-active commuters, active commuters at most half of the year (up to two out of four seasons), active commuters more than half a year (more than two out of four seasons). Estimates were adjusted for a pre-specified set of covariates: calendar year as a penalized cubic spline with 3 degrees of freedom, gender (male vs female), highest education level (compulsory, high school, university), alcohol intake (never, once/month or sometimes, 2-4 times/month, 2-3 times/week,  $\geq 4$  times/week), smoking (previous non-regular smoker, non-regular smoker, cigarette smoker, cigar or pipe smoker), occupation (gainfully employed, unemployed, not gainfully employed, retired), and registry data on area level mean income year 1994. In the basic model we adjusted only for gender and exposure year. All analyses were performed using R version 3.4.2, and the statistical inference was conducted with a 5% significance level. T-tests, global analysis of variance tests (ANOVA) and chi-square tests were used to test for differences in means and proportions of covariates between categories of exercise in training clothes (Table 1). The Schoenfeld residuals test was used to assess the assumption of proportional hazards. A sensitivity analysis was conducted by excluding participants with follow-up time below the 25th percentile.

## 3 Results

The mean age at recruitment to this cohort was 45.8 years. Among the 34,748 participants 1,148 cases of IHD were identified during a mean follow-up time of 12.4 years. Of those cases, 500 never exercised, 529 exercised at most once a week and 119 exercised at least twice a week. Table 1 summarizes characteristics of participants according to different levels of leisure time physical activity. Participants not reporting any leisure time exercise were older and more likely to be male, non-commuters and to belong to a lower socioeconomic group. Subjects performing moderate to high-level physical activity,

1  
2  
3  
4  
5  
6  
7  
8  
9  
10  
11  
12  
13  
14  
15  
16  
17  
18  
19  
20  
21  
22  
23  
24  
25  
26  
27  
28  
29  
30  
31  
32  
33  
34  
35  
36  
37  
38  
39  
40  
41  
42  
43  
44  
45  
46  
47  
48  
49  
50  
51  
52  
53  
54  
55  
56  
57  
58  
59  
60

279 were more likely to be women, non-smokers, and active commuters. The 5-year means of PM<sub>10</sub> and  
280 PM<sub>2.5</sub> concentrations were different between leisure time physical activity categories, with at most 7  
281 and 6% difference respectively for PM<sub>10</sub> and PM<sub>2.5</sub> (with distributions presented in Supplemental  
282 material A: Figures 1-4).

283  
284  
285  
286  
287  
288  
289  
290  
291

For peer review only

Table 1: Characteristics of participants at different levels of exercise in training clothes at baseline

| Characteristics                                      | Never          | At most once a week | Twice per week or more | p      |
|------------------------------------------------------|----------------|---------------------|------------------------|--------|
| Exercise in training clothes n (%)                   | 13043 (37.5)   | 14994 (43.2)        | 6711 (19.3)            |        |
| PM <sub>10</sub> , µg/m <sup>3</sup> (mean (SD))     | 10.93 (2.00)   | 11.06 (1.96)        | 10.39 (1.94)           | <0.001 |
| PM <sub>2.5</sub> , µg/m <sup>3</sup> (mean (SD))    | 6.41 (1.12)    | 6.49 (1.12)         | 6.11 (1.11)            | <0.001 |
| Frequency of active commuting (%)                    |                |                     |                        | <0.001 |
| Non-active commuting                                 | 6369 (48.8)    | 6409 (42.7)         | 2666 (39.7)            |        |
| At most two seasons of four                          | 1806 (13.8)    | 2547 (17.0)         | 1037 (15.5)            |        |
| More than two seasons of four                        | 3506 (26.9)    | 4976 (33.2)         | 2555 (38.1)            |        |
| Missing                                              | 1362 (10.4)    | 1062 (7.1)          | 453 (6.8)              |        |
| Alcohol intake (%)                                   |                |                     |                        | <0.001 |
| Never                                                | 135 (1.0)      | 120 (0.8)           | 79 (1.2)               |        |
| Once/month or sometimes                              | 5337 (40.9)    | 5950 (39.7)         | 2790 (41.6)            |        |
| 2-4 times/month                                      | 2000 (15.3)    | 2436 (16.2)         | 1061 (15.8)            |        |
| 2-3 times/week                                       | 97 (0.7)       | 93 (0.6)            | 54 (0.8)               |        |
| ≥ 4 times/week                                       | 5068 (38.9)    | 5861 (39.1)         | 2265 (33.8)            |        |
| Missing                                              | 406 (3.1)      | 534 (3.6)           | 462 (6.9)              |        |
| Smoking (%)                                          |                |                     |                        | <0.001 |
| Never smoker                                         | 5139 (39.4)    | 7240 (48.3)         | 3467 (51.7)            |        |
| Previous non-regular smoker                          | 1072 (8.2)     | 1458 (9.7)          | 711 (10.6)             |        |
| Non-regular smoker                                   | 581 (4.5)      | 807 (5.4)           | 348 (5.2)              |        |
| Previous regular smoker                              | 2729 (20.9)    | 2865 (19.1)         | 1201 (17.9)            |        |
| Cigarette smoker                                     | 2789 (21.4)    | 1805 (12.0)         | 426 (6.3)              |        |
| Cigar or pipe smoker                                 | 186 (1.4)      | 130 (0.9)           | 45 (0.7)               |        |
| Missing                                              | 547 (4.2)      | 689 (4.6)           | 513 (7.6)              |        |
| Highest education level (%)                          |                |                     |                        | <0.001 |
| Compulsory                                           | 5534 (42.4)    | 4319 (28.8)         | 1369 (20.4)            |        |
| High                                                 | 3573 (27.4)    | 4116 (27.5)         | 1951 (29.1)            |        |
| University                                           | 3449 (26.4)    | 5933 (39.6)         | 2911 (43.4)            |        |
| Missing                                              | 487 (3.7)      | 626 (4.2)           | 480 (7.2)              |        |
| Gender %, (men)                                      | 7072 (54.2)    | 8036 (53.6)         | 3274 (48.8)            | <0.001 |
| Age, y (mean (SD))                                   | 47.3 (9.1)     | 45.3 (9.0)          | 44.3 (8.6)             | <0.001 |
| Occupation (%)                                       | <0.001         |                     |                        |        |
| Gainfully employed                                   | 10536 (80.8)   | 12690 (84.6)        | 5452 (81.2)            |        |
| Unemployed                                           | 478 (3.7)      | 382 (2.5)           | 174 (2.6)              |        |
| Not gainfully employed                               | 318 (2.4)      | 352 (2.3)           | 160 (2.4)              |        |
| Retired                                              | 673 (5.2)      | 449 (3.0)           | 194 (2.9)              |        |
| Missing                                              | 1038 (8.0)     | 1121 (7.5)          | 731 (10.9)             |        |
| Mean income for the neighbourhood (SEK*) (mean (SD)) | 128286 (23018) | 130332 (23875)      | 130222 (24606)         | <0.001 |

\*SEK=Swedish krona

1  
2  
3 298 Compared with individuals who reported no exercise, those participants that exercised at least twice per  
4 299 week had a 24% lower risk of IHD (Table 2). The corresponding overall estimate associated with active  
5 300 commuting was a 13% reduced risk of IHD among individuals commuting more than two seasons per  
6 301 year.

7  
8  
9 302 Allowing for an interaction between the frequency of exercise in training clothes and particle  
10 303 concentrations ( $PM_{10}$  and  $PM_{2.5}$ ) at the home address, the average 24% risk reduction from exercising at  
11 304 least twice per week was found to be driven by statistically significant interaction between exercise and  
12 305 particle exposure with 45% and 40% risk reduction among individuals with high  $PM_{10}$  and  $PM_{2.5}$   
13 306 concentrations, respectively (table 2). The interaction coefficients estimating the additional benefit of  
14 307 exercise among individuals with a high  $PM_{10}$  concentration at their home addresses were a 3% increased  
15 308 risk among those who exercised at most once a week whereas a decreased risk of 44% was estimated  
16 309 among those who exercised at least twice a week. The corresponding estimates among those with high  
17 310  $PM_{2.5}$  concentrations were a risk reduction of 0% and 36% respectively.

18  
19  
20 311 For active commuters with low particle exposure at their home address, the risk of incident IHD was 17%  
21 312 and 18% higher among those commuting one or two seasons per year and 7% and 3% lower among  
22 313 those commuting at least two seasons per year, for  $PM_{10}$  and  $PM_{2.5}$  respectively. The benefit of active  
23 314 commuting was larger among individuals with a high particle concentration at their home address: risk  
24 315 reductions for active commuting during one or two seasons were 12% and 13% and for more than two  
25 316 seasons 18% and 21% respectively, compared with non-active commuters. No statistically significant  
26 317 interaction was found between active commuting and particle concentrations at the home address.

27  
28  
29 318  
30 319  
31 320  
32 321  
33  
34  
35  
36  
37  
38  
39  
40  
41  
42  
43  
44  
45  
46  
47  
48  
49  
50  
51  
52  
53  
54  
55  
56  
57  
58  
59  
60



322 Table 2: Hazard ratios (95% CI) for IHD associated with different exercise and commuting habits among persons with  
 323 different air pollution exposure at home addresses.  
 324  
 325

| Exercise in training clothes | Overall model with no interaction effects | Proportional hazard p-value* | Adjusted <sup>a</sup> HRs in categories of high and low particle exposure |                                          |                                     |                                          | Adjusted <sup>a</sup> interaction hazard ratio                          |                                          |
|------------------------------|-------------------------------------------|------------------------------|---------------------------------------------------------------------------|------------------------------------------|-------------------------------------|------------------------------------------|-------------------------------------------------------------------------|------------------------------------------|
|                              |                                           |                              | Low PM <sub>10</sub> <sup>b</sup>                                         | Proportional hazard p-value <sup>d</sup> | High PM <sub>10</sub> <sup>b</sup>  | Proportional hazard p-value <sup>d</sup> | Benefits of exercise/commuting comparing high and low particle exposure | Proportional hazard p-value <sup>d</sup> |
| Never                        | 1                                         |                              | 1                                                                         |                                          | 1                                   |                                          |                                                                         |                                          |
| ≤ once/week                  | 1.03 (0.90-1.16)                          | 0.35                         | 1.01 (0.84-1.21)                                                          | 0.67                                     | 1.04 (0.88-1.23)                    | 0.35                                     | 1.03 (0.81-1.32)                                                        | 0.75                                     |
| ≥ twice/week                 | 0.76 (0.62-0.93)                          | 0.08                         | 0.99 (0.76-1.29)                                                          | 0.47                                     | 0.55 (0.40-0.76)                    | 0.24                                     | 0.56 (0.37-0.84)                                                        | 0.65                                     |
|                              |                                           |                              | Low PM <sub>2.5</sub> <sup>c</sup>                                        |                                          | High PM <sub>2.5</sub> <sup>c</sup> |                                          |                                                                         |                                          |
| Never                        |                                           |                              | 1                                                                         |                                          | 1                                   |                                          |                                                                         |                                          |
| ≤ once/week                  |                                           |                              | 1.03 (0.86-1.23)                                                          | 0.78                                     | 1.03 (0.87-1.22)                    | 0.30                                     | 1.00 (0.78-1.28)                                                        | 0.61                                     |
| ≥ twice/week                 |                                           |                              | 0.94 (0.72-1.22)                                                          | 0.69                                     | 0.60 (0.44-0.82)                    | 0.09                                     | 0.64 (0.43-0.96)                                                        | 0.30                                     |
| Active commuting per season  |                                           |                              | Low PM <sub>10</sub> <sup>b</sup>                                         |                                          | High PM <sub>10</sub> <sup>b</sup>  |                                          |                                                                         |                                          |
| Non-active commuting         | 1                                         |                              | 1                                                                         |                                          | 1                                   |                                          |                                                                         |                                          |
| ≤ two seasons of four        | 1.01 (0.86-1.19)                          | 0.50                         | 1.17 (0.93-1.47)                                                          | 0.35                                     | 0.88 (0.70-1.11)                    | 0.70                                     | 0.76 (0.55-1.04)                                                        | 0.34                                     |
| > two seasons of four        | 0.87 (0.76-0.998)                         | 0.85                         | 0.93 (0.76-1.14)                                                          | 0.48                                     | 0.82 (0.68-0.98)                    | 0.89                                     | 0.88 (0.67-1.15)                                                        | 0.53                                     |
|                              |                                           |                              | Low PM <sub>2.5</sub> <sup>c</sup>                                        |                                          | High PM <sub>2.5</sub> <sup>c</sup> |                                          |                                                                         |                                          |
| Non-active commuting         |                                           |                              | 1                                                                         |                                          | 1                                   |                                          |                                                                         |                                          |
| ≤ two seasons of four        |                                           |                              | 1.18 (0.94-1.49)                                                          | 0.43                                     | 0.87 (0.69-1.10)                    | 0.76                                     | 0.73 (0.53-1.01)                                                        | 0.43                                     |
| > two seasons of four        |                                           |                              | 0.97 (0.80-1.19)                                                          | 0.37                                     | 0.79 (0.65-0.95)                    | 0.89                                     | 0.81 (0.62-1.06)                                                        | 0.44                                     |

326  
 327 <sup>a</sup>Adjusted for sex, calendar year, education, smoking, alcohol intake, occupation, neighbourhood mean income, leisure time physical activity,  
 328 and active  
 329 commuting

330 <sup>b</sup>Low PM<sub>10</sub>: ≤9.6 µg/m<sup>3</sup>; High PM<sub>10</sub>: >9.6 µg/m<sup>3</sup>

331 <sup>c</sup>Low PM<sub>2.5</sub> ≤5.7 µg/m<sup>3</sup>; High PM<sub>2.5</sub>: >5.7 µg/m<sup>3</sup>

332 <sup>d</sup> p-value of the Schoenfeld residual test of proportional hazards  
 333  
 334  
 335  
 336  
 337  
 338  
 339  
 340  
 341  
 342  
 343

344 Individuals exposed to high concentrations of PM<sub>10</sub> and PM<sub>2.5</sub> at their home address had a 14% and 1%  
345 increased risk of incident IHD respectively, compared to individuals with low concentrations (Table 3).  
346 These increased risks were, however, not statistically significant.

347 When including an interaction between particle concentrations and exercise, risk estimates showed a  
348 positive association between air pollution and IHD among individuals performing no exercise and those  
349 exercising no more than once a week, whereas a negative association was found among those exercising  
350 more than twice a week (Table 3).

351 Compared with individuals with low residential particle concentration, a high concentration of PM<sub>10</sub> was  
352 associated with 21% and 25% increased risk for IHD for those who never exercised in training clothes  
353 and those who exercised at most once a week, respectively, and showed a 32% decreased risk for those  
354 exercising at least twice a week; only the association for those exercising at most once a week was  
355 statistically significant. The corresponding estimates associated with PM<sub>2.5</sub> are increased risk of IHD of  
356 16% for those never exercising and those who exercised at most once a week, and a decreased risk of  
357 26% among those exercising at least twice a week (Table 3); none of these associations was statistically  
358 significant.

359 IHD risk associated with high residential PM<sub>10</sub> and PM<sub>2.5</sub> compared with low residential particle  
360 concentration was found to be 26% and 24% higher, respectively, among those never actively  
361 commuting; both these results were statistically significant. Among those actively commuting one or  
362 two seasons per year, IHD risk was 5% and 9% lower, respectively, while among those actively  
363 commuting more than two seasons out of four, the risk was 10% and 1% higher, respectively; none of  
364 these risks were, however, statistically significantly different from the air pollution-associated risks  
365 among the active commuters (Table 2). Overall, no statistically significant modifying effect of exercise  
366 and active commuting on the association between high particle concentration at home addresses and  
367 IHD was observed (Table 3).

### 368 Sensitivity analyses

369 Excluding participants with short follow-up time (below the 25th percentile of 3.4 years) did not affect  
370 the main conclusions of our study, however estimates tended to be lower for overall effect of air  
371 pollution on IHD (Supplementary material B: Tables 1 and 2).

372 Sensitivity analyses were also conducted with PM concentrations in tertiles. An indication of a dose-  
373 response was found, with increasing benefits of exercise in training clothes with higher levels of PM  
374 concentrations at the home address (Supplementary material C: Table 3). Exercising at least twice per  
375 week (compared with never) reduced the risk of incident IHD by 5, 17, and 49% within the first, second  
376 and third tertile of PM<sub>10</sub> exposure, respectively. Similar risk reductions were found in relation to tertiles  
377 of PM<sub>2.5</sub>.

378 No such interaction dose-response was however found for risks associated with PM exposure. Risk  
379 estimates associated with PM were somewhat higher among individuals that exercised once a week  
380 compared those who never exercised, whereas no increased risk associated with either PM<sub>10</sub> or PM<sub>2.5</sub>  
381 was found among individuals that exercised at least twice per week (Supplementary material C: Table 4).  
382 A dose-response with increasing risks for IHD were found with both PM<sub>10</sub> and PM<sub>2.5</sub> among those that  
383 never exercised.

1  
2  
3 384 These interactions between PM concentrations and exercise at least twice per week (compared with  
4 385 never) were statistically significant for PM10 and borderline statistically significant for PM2.5  
5 386 (Supplementary material C: Table 5).  
6

7 387

8 388  
9  
10  
11  
12  
13  
14  
15  
16  
17  
18  
19  
20  
21  
22  
23  
24  
25  
26  
27  
28  
29  
30  
31  
32  
33  
34  
35  
36  
37  
38  
39  
40  
41  
42  
43  
44  
45  
46  
47  
48  
49  
50  
51  
52  
53  
54  
55  
56  
57  
58  
59  
60

389 Table 3: Hazard ratios (95% CI) for IHD associated with high air pollution levels (vs low) at home address among persons with  
 390 different exercise/commuting habits.  
 391

|                                     | Overall model with no interaction effects | Proportional hazard p-value <sup>d</sup> | Adjusted <sup>a</sup> HRs in categories of high and low particle exposure |                                          |                       |                                          |                       |                                          |
|-------------------------------------|-------------------------------------------|------------------------------------------|---------------------------------------------------------------------------|------------------------------------------|-----------------------|------------------------------------------|-----------------------|------------------------------------------|
|                                     |                                           |                                          | Exercise in training clothes                                              |                                          |                       |                                          |                       |                                          |
|                                     |                                           |                                          | Never                                                                     | Proportional hazard p-value <sup>d</sup> | ≤ once/week           | Proportional hazard p-value <sup>d</sup> | ≥ twice/week          | Proportional hazard p-value <sup>d</sup> |
| Low PM <sub>10</sub> <sup>b</sup>   | 1                                         |                                          | 1                                                                         |                                          | 1                     |                                          | 1                     |                                          |
| High PM <sub>10</sub> <sup>b</sup>  | 1.14 (0.9-1.45)                           | 0.55                                     | 1.21 (0.97-1.49)                                                          | 0.71                                     | 1.25 (1.01-1.54)      | 0.45                                     | 0.68 (0.46-0.998)     | 0.50                                     |
| Low PM <sub>2.5</sub> <sup>c</sup>  | 1                                         |                                          | 1                                                                         |                                          | 1                     |                                          | 1                     |                                          |
| High PM <sub>2.5</sub> <sup>c</sup> | 1.01 (0.8-1.28)                           | 1.10                                     | 1.16 (0.94-1.44)                                                          | 0.38                                     | 1.16 (0.95-1.43)      | 0.13                                     | 0.74 (0.51-1.09)      | 0.11                                     |
| Active commuting                    |                                           |                                          |                                                                           |                                          |                       |                                          |                       |                                          |
|                                     |                                           |                                          | Non-active commuting                                                      |                                          | ≤ two seasons of four | P-value                                  | > two seasons of four |                                          |
| Low PM <sub>10</sub> <sup>b</sup>   |                                           |                                          | 1                                                                         |                                          | 1                     |                                          | 1                     |                                          |
| High PM <sub>10</sub> <sup>b</sup>  |                                           |                                          | 1.26 (1.03-1.54)                                                          | 0.39                                     | 0.95 (0.7-1.29)       | 0.66                                     | 1.10 (0.86-1.41)      | 0.17                                     |
| Low PM <sub>2.5</sub> <sup>c</sup>  |                                           |                                          | 1                                                                         |                                          | 1                     |                                          | 1                     |                                          |
| High PM <sub>2.5</sub> <sup>c</sup> |                                           |                                          | 1.24 (1.02-1.51)                                                          | 0.11                                     | 0.91 (0.67-1.24)      | 0.84                                     | 1.01 (0.79-1.29)      | 0.04                                     |

<sup>a</sup>Adjusted for sex, calendar year, education, smoking, alcohol intake, occupation, neighbourhood mean income, leisure time physical activity, active commuting

<sup>b</sup>Low PM<sub>10</sub>: ≤9.6 µg/m<sup>3</sup>; High PM<sub>10</sub>: >9.6 µg/m<sup>3</sup>

<sup>c</sup>Low PM<sub>2.5</sub> ≤5.7 µg/m<sup>3</sup>; High PM<sub>2.5</sub>: >5.7 µg/m<sup>3</sup>

<sup>d</sup> p-value of the Schoenfeld residual test of proportional hazards

## 4 Discussion

Overall, we found increased risk of first incident IHD associated with air pollution at the home address but a protective effect of physical activity. A statistically significant beneficial effect of exercise was found among individuals with high PM<sub>10</sub>/PM<sub>2.5</sub>, but not among individuals with low levels. Also, for active commuting the benefits were greater among individuals with high residential particle concentrations, but these differences were not statistically significant. Air pollution concentration-associated risks were found among individuals who exercise at most once a week but not among individuals exercising at least twice a week. Statistically significantly increased risks were also found among non-active commuters. These risks were, however, not statistically significantly different from air pollution-associated risks among the active commuters.

Our findings are in accordance with a longitudinal cohort study on MI within the Danish Diet, Cancer, and Health cohort which found an increased benefit of participation in sports among individuals with high NO<sub>2</sub> concentration at the home addresses [16]. The reported risk reduction was 9, 15, and 24% respectively among individuals with low (<14.3 µg/m<sup>3</sup>), medium (14.3-21 µg/m<sup>3</sup>) and high (>21 µg/m<sup>3</sup>) residential NO<sub>2</sub> concentration. For walking and cycling they also estimated greater risk reductions for first incident MI among individuals with higher air pollution concentrations. In the same Danish cohort, the long term benefits of physical activity on CVD mortality were also found to be greater among individuals with high residential NO<sub>2</sub> [23]. The risk reduction associated with participation in cycling and gardening among individuals exposed to high residential NO<sub>2</sub> (≥ 19 µg/m<sup>3</sup>) was greater than those exposed to moderate/low NO<sub>2</sub> concentration (<19 µg/m<sup>3</sup>). Among participants exposed to high NO<sub>2</sub>, the risk reduction for cycling and gardening was 30% and 23%, respectively, whereas among participants exposed to low NO<sub>2</sub>, risk reduction was 17% and 15%, respectively. However, the interaction effects in these two studies were not statistically significant.

Opposite findings were observed for the modifying effect of physical activity on the association between air pollution and the incidence of diabetes [15]. Among the participants in the Danish cohort, the risk of developing diabetes increased by 10% per interquartile range of 4.9 mg/m<sup>3</sup> residential NO<sub>2</sub> among physically active individuals, but there was no difference among less physically active individuals. The authors considered that this may be due to an additive rather multiplicative interaction, thus resulting in an increased risk estimate only among physical active individuals with a low risk of developing diabetes.

As inflammation is a causative mechanism for cardiovascular disease, we hypothesized that the anti-inflammatory effects of physical activity may reduce air pollution-associated risks since inflammation is one among several different pathways for the harmful health effects of air pollution. The findings of greater benefits of physical activity among individuals with higher air pollution exposure for incident IHD risk in our study and incident MI and CVD mortality in the Danish cohort, support such a hypothesis. However, a study on physical activity and white blood cell counts conducted in a large cohort of Taiwanese adults suggested no effect modification by residential air pollution measured as PM<sub>2.5</sub> [17]. Both physical activity and residential air pollution were, however, found to be associated with an inflammatory response assessed by white blood cell counts. However, the association between physical activity and white blood cell count is variable because exercise also causes a transient increase in white blood cell count which usually normalises within 24 hours [24]. The results of our study cannot be directly compared with the above mentioned studies due to the difference in pollutants [15,16,23] and health outcomes [15,16,23]. This study contributes with air pollution effect estimates on IHD incidence in a population with a relatively low level of air pollution concentrations. Compared with the previous

1  
2  
3 455 cohort studies on interaction effects between air pollution and physical activity, the annual mean PM<sub>2.5</sub>  
4 456 concentration was 3-4 times lower. The annual mean in the Taiwanese cohort was 27 µg/m<sup>3</sup> and a  
5 457 recent study within the same population as the DHC-cohort studies reported 18 µg/m<sup>3</sup>. Even at these  
6 458 lower levels of air pollution an increased risk associated with air pollution exposure was found, however  
7 459 not among those who exercised at least twice a week. Even though active commuting may result in  
8 460 higher air pollution exposure compared with for instance driving a car to work, the risk of an IHD event  
9 461 was still reduced since the benefit of the physical activity was greater than the IHD risk imposed by the  
10 462 air pollution exposure.  
11 463

12 464 A major strength of our study is the air pollution particle concentration exposure data since particles are  
13 465 considered to be the causal component of air pollution [25]. The study used individual time varying  
14 466 exposures of annual mean concentrations during follow-up based on population address registries. The  
15 467 dispersion model used for modelling of particle concentrations has previously been validated [19].  
16 468 Within the DHC studies NO<sub>2</sub> was used as a proxy for traffic generated air pollution and was assessed only  
17 469 at residential addresses at the year of recruitment or as an annual mean during follow-up. A limitation  
18 470 of our exposure data is that the statistical power only allowed for two exposure categories and  
19 471 therefore no exposure-response assessment was performed.

20 472 Another strength of our study is the prospective design, the long follow-up period, the large cohort size  
21 473 and the availability of baseline data on several important confounders. A limitation is the lack of  
22 474 information on the intensity and duration of physical activity and therefore only frequency of exercise  
23 475 could be considered. The study also lacked information on changes in physical activity and other life-  
24 476 style factors during follow-up as the information was only retrieved at baseline.

25 477 There is a risk of reverse causation if individuals at their baseline examination had a low physical activity  
26 478 level due to poorer health. Individuals could for instance have diseases that affect their risk to later in  
27 479 life have an IHD event (such as diabetes) prior to baseline examination. If this prior disease also affected  
28 480 the frequency the individual exercised in training clothes, or mode of commuting, then a reverse  
29 481 causation between physical activity and IHD risk may occur. Individuals with a prior IHD event at  
30 482 baseline were however excluded, and the sensitivity analyses that excluded individuals with follow-up  
31 483 time below the 25th percentile showed that this did not change the results. Furthermore, we lacked  
32 484 information on whether exercise is taking place outdoors or indoors. For active commuters we also lack  
33 485 air pollution exposure calculations during the commute. This would cause exposure misclassification  
34 486 among active commuters with a higher in-traffic air pollution exposure dose compared with non-active  
35 487 commuters, causing a possible bias to the null. This would also occur if individuals chose not to exercise  
36 488 outside during times with high air pollution exposure.

37 489

38 490

## 5 Conclusion

The study estimated that exercise reduced the risk of first incident IHD, but only among individuals with higher residential particle concentrations (above median). Similarly, the harmful air pollution effect on IHD was only found among those who exercised less. Our results reinforce the public health message that physical activity is beneficial for cardiovascular health and thus support the adoption of strategies to improve health through promotion of physical activity and mitigation of air pollution. Further studies are needed to build on the evidence of physical activity and air pollution interactions on the incidence cardiovascular disease. Air pollution exposures during commuting should also be considered in these studies.

500

**Author's contributions:** All the authors contributed to the study conception and design. W.R. and J.N.S. analysed the data. W.R wrote the first draft of the manuscript. B.F., B.K. and J.N.S. critically revised the manuscript for important intellectual content. All authors read and approved the final version of the manuscript.

**Funding:** The study was funded by FORTE (Forskningsrådet för hälsa, arbetsliv och välfärd) [grant number 2012-1296], a Swedish state agency that finances scientific research in health, welfare, and working life, and by grants from Folksam research foundation and the Swedish state under the agreement between the Swedish government and the county councils (ALF) awarded B F [grant number: VLL-645781].

**Competing interests:** None.

**Participants consent:** Obtained.

**Ethics approval:** The study was approved by the Regional Ethics Review Board at Umea University (DNR: 2014-136-32M and 2015/16-31Ö).

**Data availability:** No additional data is available

514

515

516

517

## 6 References

- 518
- 519
- 520 1 Lelieveld J, Klingmüller K, Pozzer A, *et al.* Cardiovascular disease burden from ambient air  
521 pollution in Europe reassessed using novel hazard ratio functions. *Eur Heart J* Published Online  
522 First: 2019. doi:10.1093/eurheartj/ehz135
- 523 2 Shrivastava AK, Singh HV, Raizada A, *et al.* C-reactive protein, inflammation and coronary heart  
524 disease. *Egypt. Hear. J.* 2015. doi:10.1016/j.ehj.2014.11.005
- 525 3 Cohen AJ, Brauer M, Burnett R, *et al.* Estimates and 25-year trends of the global burden of  
526 disease attributable to ambient air pollution: an analysis of data from the Global Burden of  
527 Diseases Study 2015. *Lancet* Published Online First: 2017. doi:10.1016/S0140-6736(17)30505-6
- 528 4 Münzel T, Gori T, Al-Kindi S, *et al.* Effects of gaseous and solid constituents of air pollution on  
529 endothelial function. *Eur. Heart J.* 2018. doi:10.1093/eurheartj/ehy481
- 530 5 Brook RD, Rajagopalan S, Pope CA, *et al.* Particulate matter air pollution and cardiovascular  
531 disease: An update to the scientific statement from the American Heart Association. *Circulation*  
532 Published Online First: 2010. doi:10.1161/CIR.0b013e3181d8e1
- 533 6 Stevens G. Global Health Risks: Mortality and burden of disease attributable to selected major  
534 risks. *World Heal. Organ.* 2009;**87**:646–646. doi:10.2471/BLT.09.070565
- 535 7 Lee I, Shiroma EJ, Lobelo F, *et al.* Impact of Physical Inactivity on the World's Major Non-  
536 Communicable Diseases. *Lancet* Published Online First: 2012. doi:10.1016/S0140-6736(12)61031-  
537 9
- 538 8 Nimmo MA, Leggate M, Viana JL, *et al.* The effect of physical activity on mediators of  
539 inflammation. *Diabetes, Obes. Metab.* 2013. doi:10.1111/dom.12156
- 540 9 Petersen AMW, Pedersen BK. The anti-inflammatory effect of exercise. *J Appl Physiol* Published  
541 Online First: 2005. doi:10.1152/jappphysiol.00164.2004
- 542 10 Rajé F, Tight M, Pope FD. Traffic pollution: A search for solutions for a city like Nairobi. *Cities*  
543 Published Online First: 2018. doi:10.1016/j.cities.2018.05.008
- 544 11 Rojas-Rueda D, De Nazelle A, Teixidó O, *et al.* Health impact assessment of increasing public  
545 transport and cycling use in Barcelona: a morbidity and burden of disease approach. *Prev Med*  
546 (*Baltim*) 2013;**57**:573–9.
- 547 12 Maizlish N, Woodcock J, Co S, *et al.* Health cobenefits and transportation-related reductions in  
548 greenhouse gas emissions in the San Francisco Bay area. *Am J Public Health* 2013;**103**:703–9.
- 549 13 Tainio M, de Nazelle AJ, Götschi T, *et al.* Can air pollution negate the health benefits of cycling  
550 and walking? *Prev Med (Baltim)* Published Online First: 2015. doi:10.1016/j.ypped.2016.02.002
- 551 14 Giles L V., Koehle MS. The health effects of exercising in air pollution. *Sport. Med.* 2014.  
552 doi:10.1007/s40279-013-0108-z
- 553 15 Andersen ZJ, Raaschou-Nielsen O, Ketznel M, *et al.* Diabetes incidence and long-term exposure to  
554 air pollution: A cohort study. *Diabetes Care* Published Online First: 2012. doi:10.2337/dc11-1155



- 1  
2  
3 555 16 Kubesch NJ, Jørgensen JT, Hoffmann B, *et al.* Effects of leisure-time and transport-related  
4 556 physical activities on the risk of incident and recurrent myocardial infarction and interaction with  
5 557 traffic-related air pollution: A cohort study. *J Am Heart Assoc* Published Online First: 2018.  
6 558 doi:10.1161/JAHA.118.009554  
7  
8 559 17 Zhang Z, Hoek G, Chang L yun, *et al.* Particulate matter air pollution, physical activity and  
9 560 systemic inflammation in Taiwanese adults. *Int J Hyg Environ Health* Published Online First: 2018.  
10 561 doi:10.1016/j.ijheh.2017.10.001  
11  
12 562 18 Norberg M, Wall S, Boman K, *et al.* The Västerbotten Intervention Programme: background,  
13 563 design and implications. *Glob Health Action* Published Online First: 2010.  
14 564 doi:10.3402/gha.v3i0.4643  
15  
16 565 19 Segersson D, Eneroth K, Gidhagen L, *et al.* **Health impact of PM10, PM2.5 and black carbon**  
17 566 **exposure due to different source sectors in Stockholm, Gothenburg and Umea, Sweden.** *Int J*  
18 567 *Environ Res Public Health* Published Online First: 2017. doi:10.3390/ijerph14070742  
19  
20 568 20 Hausberger S, Rexeis M, Zallinger M, *et al.* Emission Factors from the Model PHEM for the HBEFA  
21 569 Version 3. 2009.  
22  
23 570 21 Omstedt G, Bringfelt B, Johansson C. A model for vehicle-induced non-tailpipe emissions of  
24 571 particles along Swedish roads. *Atmos Environ* Published Online First: 2005.  
25 572 doi:10.1016/j.atmosenv.2005.06.037  
26  
27 573 22 SMHI. Airviro technical specification, appendix E. 2010.  
28 574 <http://www.smhi.se/airviro/2.867/specification/>  
29  
30 575 23 Andersen ZJ, de Nazelle A, Mendez MA, *et al.* A study of the combined effects of physical activity  
31 576 and air pollution on mortality in elderly urban residents: The Danish Diet, Cancer, and Health  
32 577 Cohort. *Environ Health Perspect* 2015.  
33  
34 578 24 Abramson N, Melton B. Leukocytosis: Basics of clinical assessment. *Am. Fam. Physician.* 2000.  
35  
36 579 25 World Health Organization. Review of evidence on health aspects of air pollution – REVIHAAP  
37 580 Project: Technical Report. 2013. doi:10.1007/BF00379640  
38  
39 581  
40  
41 582  
42  
43  
44  
45  
46  
47  
48  
49  
50  
51  
52  
53  
54  
55  
56  
57  
58  
59  
60

A1: Distributions of PM10 and PM2.5 moving averages (lag 1-5) for the person-years included in the study

Figure 1: PM10 distribution

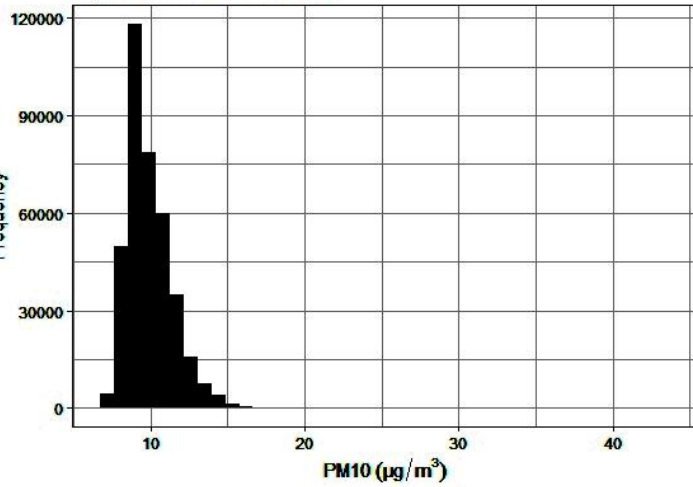

Figure 2: PM2.5 distribution

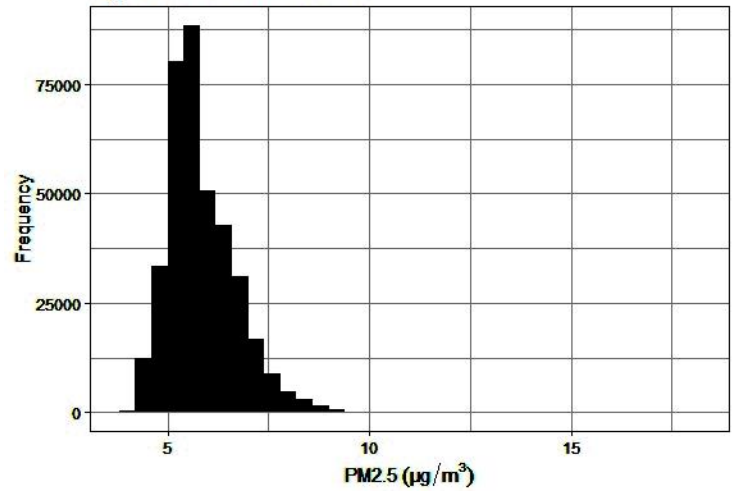

A2: Distributions of PM10 and PM2.5 moving averages (lag 1-5) for the person-years included in the study at different levels of physical activity (exercise in training clothes).

Figure 3: PM10 at different levels of exercise

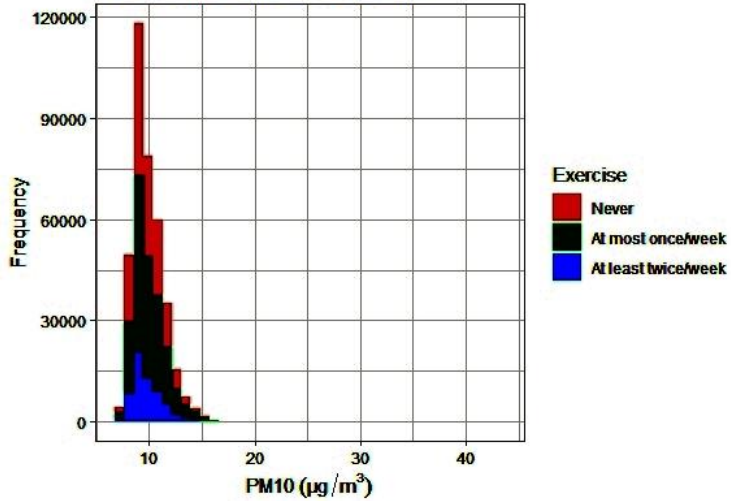

Figure 4: PM2.5 at different levels of exercise

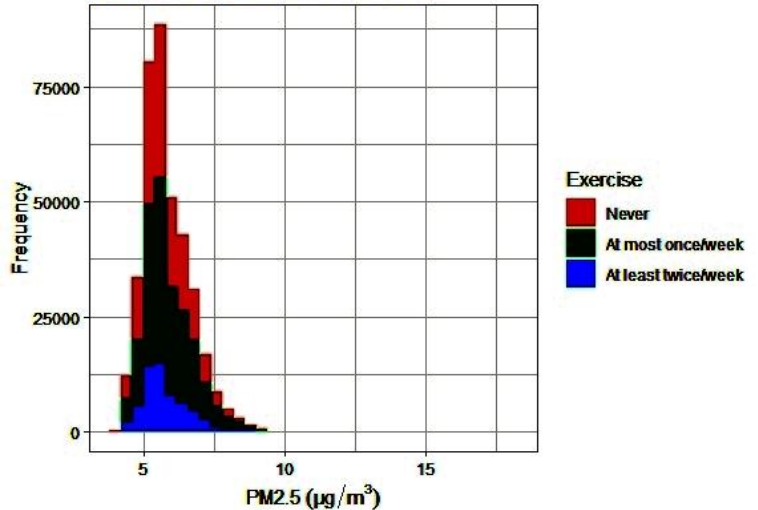

**B: Sensitivity analysis by excluding the individuals with follow-up time below the 25th percentile**

Table 1. Hazard ratios (95% CI) for IHD associated with different exercise and commuting habits among persons with different air pollution exposure at home addresses.

| Exercise in training clothes | Overall model with no interaction effects | Adjusted <sup>a</sup> HRs in categories of high and low particle exposure |                                     | Adjusted <sup>a</sup> interaction hazard ratio                          |
|------------------------------|-------------------------------------------|---------------------------------------------------------------------------|-------------------------------------|-------------------------------------------------------------------------|
|                              |                                           | Low PM <sub>10</sub> <sup>b</sup>                                         | High PM <sub>10</sub> <sup>b</sup>  |                                                                         |
|                              |                                           |                                                                           |                                     | Benefits of exercise/commuting comparing high and low particle exposure |
| Never                        | 1                                         | 1                                                                         | 1                                   |                                                                         |
| ≤ once/week                  | 1.00 (0.84-1.19)                          | 1.01 (0.84-1.21)                                                          | 1.02 (0.85-1.23)                    | 1.02 (0.79-1.31)                                                        |
| ≥ twice/week                 | 0.88 (0.76-1.02)                          | 1.0 (0.77-1.31)                                                           | 0.48 (0.34-0.7)                     | 0.48 (0.31-0.76)                                                        |
|                              |                                           | Low PM <sub>2.5</sub> <sup>c</sup>                                        | High PM <sub>2.5</sub> <sup>c</sup> |                                                                         |
| Never                        |                                           | 1                                                                         | 1                                   |                                                                         |
| ≤ once/week                  |                                           | 1.01 (0.84-1.21)                                                          | 1.02 (0.85-1.23)                    | 1.01 (0.78-1.31)                                                        |
| ≥ twice/week                 |                                           | 0.95 (0.72-1.24)                                                          | 0.53 (0.37-0.75)                    | 0.56 (0.36-0.87)                                                        |
| Active commuting per season  |                                           | Low PM <sub>10</sub> <sup>b</sup>                                         | High PM <sub>10</sub> <sup>b</sup>  |                                                                         |
| Non-active commuting         | 1                                         | 1                                                                         | 1                                   |                                                                         |
| ≤ two seasons of four        | 1.02 (0.89-1.16)                          | 1.16 (0.92-1.46)                                                          | 0.85 (0.66-1.09)                    | 0.73 (0.52-1.03)                                                        |
| > two seasons of four        | 0.74 (0.6-0.92)                           | 0.91 (0.74-1.12)                                                          | 0.83 (0.68-1.02)                    | 0.91 (0.69-1.2)                                                         |
|                              |                                           | Low PM <sub>2.5</sub> <sup>c</sup>                                        | High PM <sub>2.5</sub> <sup>c</sup> |                                                                         |
| Non-active commuting         |                                           | 1                                                                         | 1                                   |                                                                         |
| ≤ two seasons of four        |                                           | 1.18 (0.93-1.48)                                                          | 0.84 (0.65-1.08)                    | 0.70 (0.50-0.98)                                                        |
| > two seasons of four        |                                           | 0.98 (0.80-1.2)                                                           | 0.79 (0.64-0.96)                    | 0.82 (0.62-1.09)                                                        |

<sup>a</sup>Adjusted for sex, calendar year, education, smoking, alcohol intake, occupation, neighbourhood mean income, leisure time physical activity, active commuting

<sup>b</sup>Low PM<sub>10</sub>: ≤9.6 µg/m<sup>3</sup>; High PM<sub>10</sub>: >9.6 µg/m<sup>3</sup>

<sup>c</sup>Low PM<sub>2.5</sub> ≤5.7 µg/m<sup>3</sup>; High PM<sub>2.5</sub>: >5.7 µg/m<sup>3</sup>

Table 2. Hazard ratios (95% CI) for IHD associated with high air pollution levels (vs low) at home address among persons with different exercise/commuting habits.

|                                     | Overall model with No interaction effects | Adjusted <sup>a</sup> HRs in different exercise categories |                       |                       |
|-------------------------------------|-------------------------------------------|------------------------------------------------------------|-----------------------|-----------------------|
|                                     |                                           | Exercise in training clothes                               |                       |                       |
|                                     |                                           | Never                                                      | ≤ once/week           | ≥ twice/week          |
| Low PM <sub>10</sub> <sup>b</sup>   | 1                                         | 1                                                          | 1                     | 1                     |
| High PM <sub>10</sub> <sup>b</sup>  | 1.22 (0.96-1.56)                          | 1.25 (1.0-1.56)                                            | 1.27 (1.03-1.58)      | 0.61 (0.40-0.93)      |
| Low PM <sub>2.5</sub> <sup>c</sup>  | 1                                         | 1                                                          | 1                     | 1                     |
| High PM <sub>2.5</sub> <sup>c</sup> | 0.95 (0.74-1.21)                          | 1.15 (0.92-1.43)                                           | 1.16 (0.94-1.44)      | 0.64 (0.42-0.97)      |
|                                     |                                           | Active commuting                                           |                       |                       |
|                                     |                                           | Non-active commuting                                       | ≤ two seasons of four | > two seasons of four |
| Low PM <sub>10</sub> <sup>b</sup>   |                                           | 1                                                          | 1                     | 1                     |
| High PM <sub>10</sub> <sup>b</sup>  |                                           | 1.28 (1.04-1.57)                                           | 0.94 (0.68-1.29)      | 1.16 (0.9-1.5)        |
| Low PM <sub>2.5</sub> <sup>c</sup>  |                                           | 1                                                          | 1                     | 1                     |
| High PM <sub>2.5</sub> <sup>c</sup> |                                           | 1.23 (1.0-1.51)                                            | 0.88 (0.64-1.21)      | 0.99 (0.76-1.27)      |

<sup>a</sup>Adjusted for sex, calendar year, education, smoking, alcohol intake, occupation, neighbourhood mean income, leisure time physical activity, active commuting

<sup>b</sup>Low PM<sub>10</sub>: ≤9.6 µg/m<sup>3</sup>; High PM<sub>10</sub>: >9.6 µg/m<sup>3</sup>

<sup>c</sup>Low PM<sub>2.5</sub> ≤5.7 µg/m<sup>3</sup>; High PM<sub>2.5</sub>: >5.7 µg/m<sup>3</sup>

### C: Sensitivity analyses with PM10 and PM2.5 concentrations categorized by tertile limits

Table 3. Hazard ratios (95% CI) for IHD associated with different exercise and commuting habits among persons with different air pollution exposure at home addresses.

| Exercise in training clothes | Overall model with no interaction effects | Proportional hazard p <sup>d</sup> -value* | Adjusted <sup>a</sup> HRs in categories of high and low particle exposure |                                          |                                         |                                          |                                     |                                          |
|------------------------------|-------------------------------------------|--------------------------------------------|---------------------------------------------------------------------------|------------------------------------------|-----------------------------------------|------------------------------------------|-------------------------------------|------------------------------------------|
|                              |                                           |                                            | Low PM <sub>10</sub> <sup>b</sup>                                         | Proportional hazard p-value <sup>d</sup> | Moderate PM <sub>10</sub> <sup>b</sup>  | Proportional hazard p-value <sup>d</sup> | High PM <sub>10</sub> <sup>b</sup>  | Proportional hazard p-value <sup>d</sup> |
| Never                        | 1                                         |                                            | 1                                                                         |                                          | 1                                       |                                          |                                     |                                          |
| ≤ once/week                  | 1.03 (0.90-1.16)                          | 0.36                                       | 0.93 (0.74-1.16)                                                          | 0.42                                     | 1.15 (0.94-1.41)                        | 0.95                                     | 0.99 (0.80-1.23)                    | 0.37                                     |
| ≥ twice/week                 | 0.76 (0.62-0.93)                          | 0.09                                       | 0.95 (0.68-1.32)                                                          | 0.54                                     | 0.83 (0.60-1.15)                        | 0.16                                     | 0.51 (0.34-0.77)                    | 0.86                                     |
|                              |                                           |                                            | Low PM <sub>2.5</sub> <sup>c</sup>                                        |                                          | Moderate PM <sub>2.5</sub> <sup>c</sup> |                                          | High PM <sub>2.5</sub> <sup>c</sup> |                                          |
| Never                        |                                           |                                            | 1                                                                         |                                          | 1                                       |                                          |                                     |                                          |
| ≤ once/week                  |                                           |                                            | 0.98 (0.78-1.22)                                                          | 0.67                                     | 1.08 (0.88-1.32)                        | 0.60                                     | 1.02 (0.82-1.26)                    | 0.48                                     |
| ≥ twice/week                 |                                           |                                            | 0.91 (0.65-1.27)                                                          | 0.71                                     | 0.83 (0.60-1.14)                        | 0.13                                     | 0.54 (0.36-0.82)                    | 0.60                                     |

<sup>a</sup>Adjusted for sex, calendar year, education, smoking, alcohol intake, occupation, neighbourhood mean income, leisure time physical activity, and active commuting

<sup>b</sup>Low PM<sub>10</sub>: ≤9.6 µg/m<sup>3</sup>; High PM<sub>10</sub>: >9.6 µg/m<sup>3</sup>

<sup>c</sup>Low PM<sub>2.5</sub> ≤5.7 µg/m<sup>3</sup>; High PM<sub>2.5</sub>: >5.7 µg/m<sup>3</sup>

<sup>d</sup>p-value of the Schoenfeld residual test of proportional hazards

Table 4. Hazard ratios (95% CI) for IHD associated with high and moderate air pollution levels (vs low) at home address among persons with different exercise/commuting habits.

|                                        | Overall model with no interaction effects | Proportional hazard p-value <sup>d</sup> | Adjusted <sup>a</sup> HRs in categories of high and low particle exposure |                                          |                     |                                          |                  |                                          |
|----------------------------------------|-------------------------------------------|------------------------------------------|---------------------------------------------------------------------------|------------------------------------------|---------------------|------------------------------------------|------------------|------------------------------------------|
|                                        |                                           |                                          | Exercise in training clothes                                              |                                          |                     |                                          |                  |                                          |
|                                        |                                           |                                          | Never                                                                     | Proportional hazard p-value <sup>d</sup> | ≤ once/week         | Proportional hazard p-value <sup>d</sup> | ≥ twice/week     | Proportional hazard p-value <sup>d</sup> |
| Low PM <sub>10</sub> <sup>b</sup>      | 1                                         |                                          | 1                                                                         |                                          | 1                   |                                          | 1                |                                          |
| Moderate PM <sub>10</sub> <sup>b</sup> | 1.04 (0.81-1.34)                          | 0.55                                     | 1.05 (0.83 - 1.32)                                                        | 0.35                                     | 1.30 ( 1.03 - 1.63) | 0.95                                     | 0.92 (0.61-1.39) | 0.26                                     |
| High PM <sub>10</sub> <sup>b</sup>     | 1.00 (0.69-1.45)                          | 0.99                                     | 1.16 ( 0.87 - 1.53)                                                       | 0.13                                     | 1.23 (0.93-1.64)    | 0.13                                     | 0.62 (0.37-1.04) | 0.56                                     |
| Low PM <sub>2.5</sub> <sup>c</sup>     | 1                                         |                                          | 1                                                                         |                                          | 1                   |                                          | 1                |                                          |
| Moderate PM <sub>10</sub> <sup>b</sup> | 1.12 (0.88-1.43)                          | 0.94                                     | 1.11 ( 0.89 - 1.39)                                                       | 0.73                                     | 1.23 ( 0.98-1.53)   | 0.73                                     | 1.02 (0.67-1.54) | 0.30                                     |
| High PM <sub>2.5</sub> <sup>c</sup>    | 1.15 (0.79-1.68)                          | 0.13                                     | 1.18 ( 0.89 - 1.57)                                                       | 0.05                                     | 1.23 (0.92-1.64)    | 0.04                                     | 0.71 (0.42-1.18) | 0.22                                     |

<sup>a</sup>Adjusted for sex, calendar year, education, smoking, alcohol intake, occupation, neighbourhood mean income, leisure time physical activity, and active commuting

<sup>b</sup>Low PM<sub>10</sub>: ≤9.6 µg/m<sup>3</sup>; High PM<sub>10</sub>: >9.6 µg/m<sup>3</sup>

<sup>c</sup>Low PM<sub>2.5</sub> ≤5.7 µg/m<sup>3</sup>; High PM<sub>2.5</sub>: >5.7 µg/m<sup>3</sup>

<sup>d</sup>p-value of the Schoenfeld residual test of proportional hazards

Table 5. Interaction hazard ratios between exercise and air pollution for incident IHD

| Exercise in training clothes | Adjusted <sup>a</sup> interaction hazard ratio                                       |                                          |                                                                                          |                                          |
|------------------------------|--------------------------------------------------------------------------------------|------------------------------------------|------------------------------------------------------------------------------------------|------------------------------------------|
|                              | Benefits of exercise comparing moderate with low particle exposure                   |                                          | Benefits of exercise comparing high with low particle exposure                           |                                          |
|                              | Moderate PM <sub>10</sub> <sup>b</sup>                                               | Proportional hazard p-value <sup>d</sup> | High PM <sub>10</sub> <sup>b</sup>                                                       | Proportional hazard p-value <sup>d</sup> |
| Never                        | 1                                                                                    |                                          | 1                                                                                        |                                          |
| ≤ once/week                  | 1.24 (0.91-1.68)                                                                     | 0.51                                     | 1.07 (0.78-1.45)                                                                         | 0.99                                     |
| ≥ twice/week                 | 0.88 (0.55-1.39)                                                                     | 0.58                                     | 0.54 (0.32-0.92)                                                                         | 0.81                                     |
|                              | Benefits of exercise comparing high with low PM <sub>2.5</sub> <sup>b</sup> exposure |                                          | Benefits of exercise comparing moderate with low PM <sub>2.5</sub> <sup>b</sup> exposure |                                          |
| Never                        | 1                                                                                    |                                          | 1                                                                                        |                                          |
| ≤ once/week                  | 1.11 (0.82-1.50)                                                                     | 0.97                                     | 1.04 (0.77-1.42)                                                                         | 0.87                                     |
| ≥ twice/week                 | 0.92 (0.58-1.46)                                                                     | 0.45                                     | 0.60 (0.35-1.02)                                                                         | 0.87                                     |

<sup>a</sup>Adjusted for sex, calendar year, education, smoking, alcohol intake, occupation, neighbourhood mean income, leisure time physical activity, and active commuting

<sup>b</sup>Low PM<sub>10</sub>: ≤9.6 µg/m<sup>3</sup>; High PM<sub>10</sub>: >9.6 µg/m<sup>3</sup>

<sup>c</sup>Low PM<sub>2.5</sub> ≤5.7 µg/m<sup>3</sup>; High PM<sub>2.5</sub>: >5.7 µg/m<sup>3</sup>

<sup>d</sup>p-value of the Schoenfeld residual test of proportional hazards

**STROBE 2007 (v4) Statement—Checklist of items that should be included in reports of *cohort studies***

| Section/Topic                | Item # | Recommendation                                                                                                                                                                       | Reported on page # |
|------------------------------|--------|--------------------------------------------------------------------------------------------------------------------------------------------------------------------------------------|--------------------|
| <b>Title and abstract</b>    | 1      | (a) Indicate the study's design with a commonly used term in the title or the abstract                                                                                               | 1                  |
|                              |        | (b) Provide in the abstract an informative and balanced summary of what was done and what was found                                                                                  | 2                  |
| <b>Introduction</b>          |        |                                                                                                                                                                                      |                    |
| Background/rationale         | 2      | Explain the scientific background and rationale for the investigation being reported                                                                                                 | 4                  |
| Objectives                   | 3      | State specific objectives, including any prespecified hypotheses                                                                                                                     | 4                  |
| <b>Methods</b>               |        |                                                                                                                                                                                      |                    |
| Study design                 | 4      | Present key elements of study design early in the paper                                                                                                                              | 5                  |
| Setting                      | 5      | Describe the setting, locations, and relevant dates, including periods of recruitment, exposure, follow-up, and data collection                                                      | 5                  |
| Participants                 | 6      | (a) Give the eligibility criteria, and the sources and methods of selection of participants. Describe methods of follow-up                                                           | 5                  |
|                              |        | (b) For matched studies, give matching criteria and number of exposed and unexposed                                                                                                  |                    |
| Variables                    | 7      | Clearly define all outcomes, exposures, predictors, potential confounders, and effect modifiers. Give diagnostic criteria, if applicable                                             | 5-6                |
| Data sources/<br>measurement | 8*     | For each variable of interest, give sources of data and details of methods of assessment (measurement). Describe comparability of assessment methods if there is more than one group | 5-6                |
| Bias                         | 9      | Describe any efforts to address potential sources of bias                                                                                                                            | 6                  |
| Study size                   | 10     | Explain how the study size was arrived at                                                                                                                                            | 5                  |
| Quantitative variables       | 11     | Explain how quantitative variables were handled in the analyses. If applicable, describe which groupings were chosen and why                                                         | 5-6                |
| Statistical methods          | 12     | (a) Describe all statistical methods, including those used to control for confounding                                                                                                | 7                  |
|                              |        | (b) Describe any methods used to examine subgroups and interactions                                                                                                                  | 7                  |
|                              |        | (c) Explain how missing data were addressed                                                                                                                                          | 5                  |
|                              |        | (d) If applicable, explain how loss to follow-up was addressed                                                                                                                       | 7                  |
|                              |        | (e) Describe any sensitivity analyses                                                                                                                                                |                    |
| <b>Results</b>               |        |                                                                                                                                                                                      |                    |

|                          |     |                                                                                                                                                                                                              |       |
|--------------------------|-----|--------------------------------------------------------------------------------------------------------------------------------------------------------------------------------------------------------------|-------|
| Participants             | 13* | (a) Report numbers of individuals at each stage of study—eg numbers potentially eligible, examined for eligibility, confirmed eligible, included in the study, completing follow-up, and analysed            | 5     |
|                          |     | (b) Give reasons for non-participation at each stage                                                                                                                                                         | 5     |
|                          |     | (c) Consider use of a flow diagram                                                                                                                                                                           |       |
| Descriptive data         | 14* | (a) Give characteristics of study participants (eg demographic, clinical, social) and information on exposures and potential confounders                                                                     | 7     |
|                          |     | (b) Indicate number of participants with missing data for each variable of interest                                                                                                                          | 8     |
|                          |     | (c) Summarise follow-up time (eg, average and total amount)                                                                                                                                                  | 7     |
| Outcome data             | 15* | Report numbers of outcome events or summary measures over time                                                                                                                                               | 7     |
| Main results             | 16  | (a) Give unadjusted estimates and, if applicable, confounder-adjusted estimates and their precision (eg, 95% confidence interval). Make clear which confounders were adjusted for and why they were included | 8-11  |
|                          |     | (b) Report category boundaries when continuous variables were categorized                                                                                                                                    | 9, 11 |
|                          |     | (c) If relevant, consider translating estimates of relative risk into absolute risk for a meaningful time period                                                                                             |       |
| Other analyses           | 17  | Report other analyses done—eg analyses of subgroups and interactions, and sensitivity analyses                                                                                                               | 9-11  |
| <b>Discussion</b>        |     |                                                                                                                                                                                                              |       |
| Key results              | 18  | Summarise key results with reference to study objectives                                                                                                                                                     | 12    |
| <b>Limitations</b>       |     |                                                                                                                                                                                                              |       |
| Interpretation           | 20  | Give a cautious overall interpretation of results considering objectives, limitations, multiplicity of analyses, results from similar studies, and other relevant evidence                                   | 12-13 |
| Generalisability         | 21  | Discuss the generalisability (external validity) of the study results                                                                                                                                        | 13    |
| <b>Other information</b> |     |                                                                                                                                                                                                              |       |
| Funding                  | 22  | Give the source of funding and the role of the funders for the present study and, if applicable, for the original study on which the present article is based                                                | 14    |

\*Give information separately for cases and controls in case-control studies and, if applicable, for exposed and unexposed groups in cohort and cross-sectional studies.

**Note:** An Explanation and Elaboration article discusses each checklist item and gives methodological background and published examples of transparent reporting. The STROBE checklist is best used in conjunction with this article (freely available on the Web sites of PLoS Medicine at <http://www.plosmedicine.org/>, Annals of Internal Medicine at <http://www.annals.org/>, and Epidemiology at <http://www.epidem.com/>). Information on the STROBE Initiative is available at [www.strobe-statement.org](http://www.strobe-statement.org).
