# Supplementary material for: Air pollution, physical activity and ischaemic heart disease: a prospective cohort study of interaction effects
Source: PubMed Central journal article supplement (PMC8051414; doi:10.1136/bmjopen-2020-040912), 2021-04-13
Supplement: bmjopen-2020-040912supp001.pdf [file bmjopen-2020-040912supp001.pdf]

A1: Distributions of PM10 and PM2.5 moving averages (lag 1-5) for the person-years included in the study

Figure 1: PM10 distribution

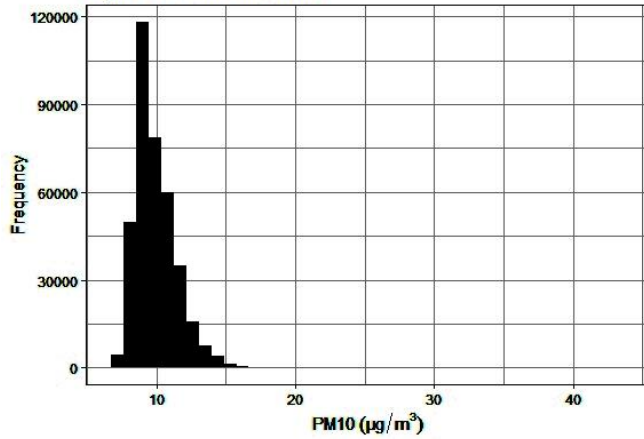

Figure 2: PM2.5 distribution

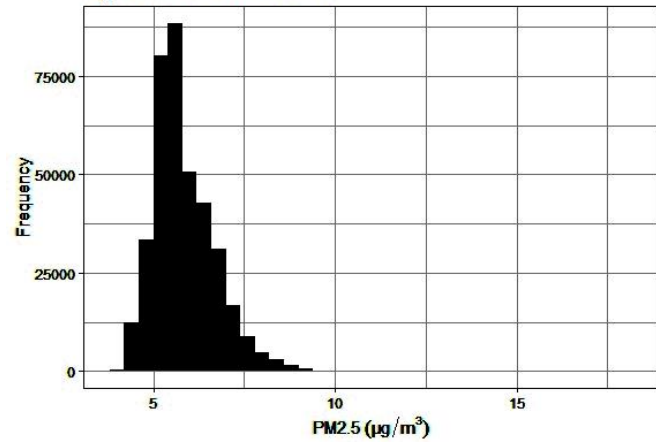

A2: Distributions of PM10 and PM2.5 moving averages (lag 1-5) for the person-years included in the study at different levels of physical activity (exercise in training clothes).

Figure 3: PM10 at different levels of exercise

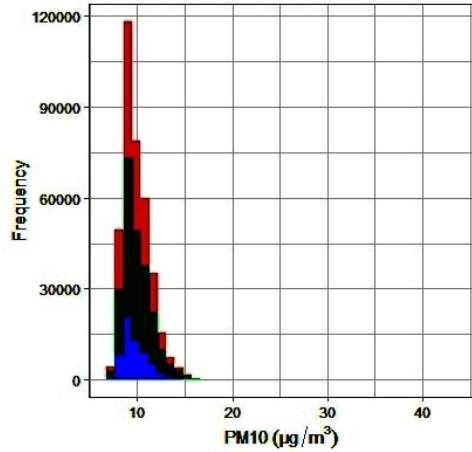

Figure 4: PM2.5 at different levels of exercise

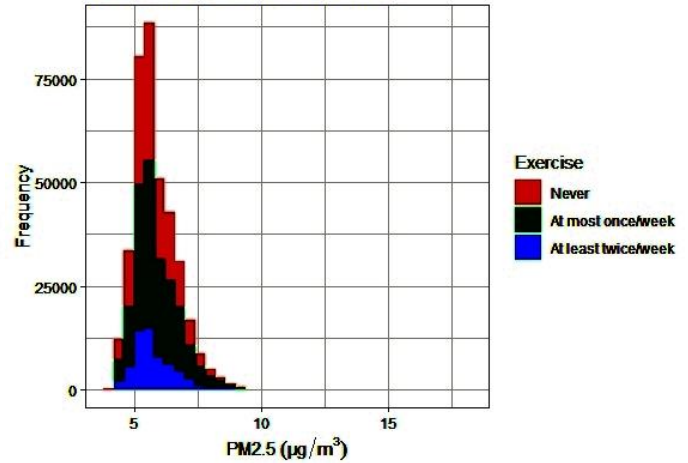

**B: Sensitivity analysis by excluding the individuals with follow-up time below the 25th percentile**

Table 1. Hazard ratios (95% CI) for IHD associated with different exercise and commuting habits among persons with different air pollution exposure at home addresses.

| Exercise in training clothes | Overall model with no interaction effects | Adjusted <sup>a</sup> HRs in categories of high and low particle exposure |                                     | Adjusted <sup>a</sup> interaction hazard ratio                          |
|------------------------------|-------------------------------------------|---------------------------------------------------------------------------|-------------------------------------|-------------------------------------------------------------------------|
|                              |                                           | Low PM <sub>10</sub> <sup>b</sup>                                         | High PM <sub>10</sub> <sup>b</sup>  |                                                                         |
|                              |                                           | Low PM <sub>2.5</sub> <sup>c</sup>                                        | High PM <sub>2.5</sub> <sup>c</sup> | Benefits of exercise/commuting comparing high and low particle exposure |
| Never                        | 1                                         | 1                                                                         | 1                                   |                                                                         |
| ≤ once/week                  | 1.00 (0.84-1.19)                          | 1.01 (0.84-1.21)                                                          | 1.02 (0.85-1.23)                    | 1.02 (0.79-1.31)                                                        |
| ≥ twice/week                 | 0.88 (0.76-1.02)                          | 1.0 (0.77-1.31)                                                           | 0.48 (0.34-0.7)                     | 0.48 (0.31-0.76)                                                        |
|                              |                                           | Low PM <sub>10</sub> <sup>b</sup>                                         | High PM <sub>10</sub> <sup>b</sup>  |                                                                         |
| Never                        | 1                                         | 1                                                                         | 1                                   |                                                                         |
| ≤ once/week                  |                                           | 1.01 (0.84-1.21)                                                          | 1.02 (0.85-1.23)                    | 1.01 (0.78-1.31)                                                        |
| ≥ twice/week                 |                                           | 0.95 (0.72-1.24)                                                          | 0.53 (0.37-0.75)                    | 0.56 (0.36-0.87)                                                        |
| Active commuting per season  |                                           | Low PM <sub>10</sub> <sup>b</sup>                                         | High PM <sub>10</sub> <sup>b</sup>  |                                                                         |
| Non-active commuting         | 1                                         | 1                                                                         | 1                                   |                                                                         |
| ≤ two seasons of four        | 1.02 (0.89-1.16)                          | 1.16 (0.92-1.46)                                                          | 0.85 (0.66-1.09)                    | 0.73 (0.52-1.03)                                                        |
| > two seasons of four        | 0.74 (0.6-0.92)                           | 0.91 (0.74-1.12)                                                          | 0.83 (0.68-1.02)                    | 0.91 (0.69-1.2)                                                         |
|                              |                                           | Low PM <sub>2.5</sub> <sup>c</sup>                                        | High PM <sub>2.5</sub> <sup>c</sup> |                                                                         |
| Non-active commuting         |                                           | 1                                                                         | 1                                   |                                                                         |
| ≤ two seasons of four        |                                           | 1.18 (0.93-1.48)                                                          | 0.84 (0.65-1.08)                    | 0.70 (0.50-0.98)                                                        |
| > two seasons of four        |                                           | 0.98 (0.80-1.2)                                                           | 0.79 (0.64-0.96)                    | 0.82 (0.62-1.09)                                                        |

<sup>a</sup>Adjusted for sex, calendar year, education, smoking, alcohol intake, occupation, neighbourhood mean income, leisure time physical activity, active commuting

<sup>b</sup>Low PM<sub>10</sub>: ≤9.6 µg/m<sup>3</sup>; High PM<sub>10</sub>: >9.6 µg/m<sup>3</sup>

<sup>c</sup>Low PM<sub>2.5</sub> ≤5.7 µg/m<sup>3</sup>; High PM<sub>2.5</sub>: >5.7 µg/m<sup>3</sup>

Table 2. Hazard ratios (95% CI) for IHD associated with high air pollution levels (vs low) at home address among persons with different exercise/commuting habits.

|                                     | Overall model with No interaction effects | Adjusted <sup>a</sup> HRs in different exercise categories |                       |                       |
|-------------------------------------|-------------------------------------------|------------------------------------------------------------|-----------------------|-----------------------|
|                                     |                                           | Exercise in training clothes                               |                       |                       |
|                                     |                                           | Never                                                      | ≤ once/week           | ≥ twice/week          |
| Low PM <sub>10</sub> <sup>b</sup>   | 1                                         | 1                                                          | 1                     | 1                     |
| High PM <sub>10</sub> <sup>b</sup>  | 1.22 (0.96-1.56)                          | 1.25 (1.0-1.56)                                            | 1.27 (1.03-1.58)      | 0.61 (0.40-0.93)      |
| Low PM <sub>2.5</sub> <sup>c</sup>  | 1                                         | 1                                                          | 1                     | 1                     |
| High PM <sub>2.5</sub> <sup>c</sup> | 0.95 (0.74-1.21)                          | 1.15 (0.92-1.43)                                           | 1.16 (0.94-1.44)      | 0.64 (0.42-0.97)      |
|                                     |                                           | Active commuting                                           |                       |                       |
|                                     |                                           | Non-active commuting                                       | ≤ two seasons of four | > two seasons of four |
| Low PM <sub>10</sub> <sup>b</sup>   |                                           | 1                                                          | 1                     | 1                     |
| High PM <sub>10</sub> <sup>b</sup>  |                                           | 1.28 (1.04-1.57)                                           | 0.94 (0.68-1.29)      | 1.16 (0.9-1.5)        |
| Low PM <sub>2.5</sub> <sup>c</sup>  |                                           | 1                                                          | 1                     | 1                     |
| High PM <sub>2.5</sub> <sup>c</sup> |                                           | 1.23 (1.0-1.51)                                            | 0.88 (0.64-1.21)      | 0.99 (0.76-1.27)      |

<sup>a</sup>Adjusted for sex, calendar year, education, smoking, alcohol intake, occupation, neighbourhood mean income, leisure time physical activity, active commuting

<sup>b</sup>Low PM<sub>10</sub>: ≤9.6 µg/m<sup>3</sup>; High PM<sub>10</sub>: >9.6 µg/m<sup>3</sup>

<sup>c</sup>Low PM<sub>2.5</sub> ≤5.7 µg/m<sup>3</sup>; High PM<sub>2.5</sub>: >5.7 µg/m<sup>3</sup>

**C: Sensitivity analyses with PM10 and PM2.5 concentrations categorized by tertile limits**

Table 3. Hazard ratios (95% CI) for IHD associated with different exercise and commuting habits among persons with different air pollution exposure at home addresses.

| Exercise in training clothes | Overall model with no interaction effects | Proportional hazard p-value* | Adjusted <sup>a</sup> HRs in categories of high and low particle exposure |                                          |                                         |                                          |                                     |                                          |
|------------------------------|-------------------------------------------|------------------------------|---------------------------------------------------------------------------|------------------------------------------|-----------------------------------------|------------------------------------------|-------------------------------------|------------------------------------------|
|                              |                                           |                              | Low PM <sub>10</sub> <sup>b</sup>                                         | Proportional hazard p-value <sup>d</sup> | Moderate PM <sub>10</sub> <sup>b</sup>  | Proportional hazard p-value <sup>d</sup> | High PM <sub>10</sub> <sup>b</sup>  | Proportional hazard p-value <sup>d</sup> |
| Never                        | 1                                         |                              | 1                                                                         |                                          | 1                                       |                                          |                                     |                                          |
| ≤ once/week                  | 1.03 (0.90-1.16)                          | 0.36                         | 0.93 (0.74-1.16)                                                          | 0.42                                     | 1.15 (0.94-1.41)                        | 0.95                                     | 0.99 (0.80-1.23)                    | 0.37                                     |
| ≥ twice/week                 | 0.76 (0.62-0.93)                          | 0.09                         | 0.95 (0.68-1.32)                                                          | 0.54                                     | 0.83 (0.60-1.15)                        | 0.16                                     | 0.51 (0.34-0.77)                    | 0.86                                     |
|                              |                                           |                              | Low PM <sub>2.5</sub> <sup>c</sup>                                        |                                          | Moderate PM <sub>2.5</sub> <sup>c</sup> |                                          | High PM <sub>2.5</sub> <sup>c</sup> |                                          |
| Never                        |                                           |                              | 1                                                                         |                                          | 1                                       |                                          |                                     |                                          |
| ≤ once/week                  |                                           |                              | 0.98 (0.78-1.22)                                                          | 0.67                                     | 1.08 (0.88-1.32)                        | 0.60                                     | 1.02 (0.82-1.26)                    | 0.48                                     |
| ≥ twice/week                 |                                           |                              | 0.91 (0.65-1.27)                                                          | 0.71                                     | 0.83 (0.60-1.14)                        | 0.13                                     | 0.54 (0.36-0.82)                    | 0.60                                     |

<sup>a</sup>Adjusted for sex, calendar year, education, smoking, alcohol intake, occupation, neighbourhood mean income, leisure time physical activity, and active commuting

<sup>b</sup>Low PM<sub>10</sub>: ≤9.6 µg/m<sup>3</sup>; High PM<sub>10</sub>: >9.6 µg/m<sup>3</sup>

<sup>c</sup>Low PM<sub>2.5</sub>: ≤5.7 µg/m<sup>3</sup>; High PM<sub>2.5</sub>: >5.7 µg/m<sup>3</sup>

<sup>d</sup>p-value of the Schoenfeld residual test of proportional hazards

Table 4. Hazard ratios (95% CI) for IHD associated with high and moderate air pollution levels (vs low) at home address among persons with different exercise/commuting habits.

|                                          | Overall model with no interaction effects | Proportional hazard p-value <sup>d</sup> | Adjusted <sup>a</sup> HRs in categories of high and low particle exposure |                                          |                     |                                          |                  |                                          |
|------------------------------------------|-------------------------------------------|------------------------------------------|---------------------------------------------------------------------------|------------------------------------------|---------------------|------------------------------------------|------------------|------------------------------------------|
|                                          |                                           |                                          | Exercise in training clothes                                              |                                          |                     |                                          |                  |                                          |
|                                          |                                           |                                          | Never                                                                     | Proportional hazard p-value <sup>d</sup> | ≤ once/week         | Proportional hazard p-value <sup>d</sup> | ≥ twice/week     | Proportional hazard p-value <sup>d</sup> |
| Low PM <sub>10</sub> <sup>b</sup>        | 1                                         |                                          | 1                                                                         |                                          | 1                   |                                          | 1                |                                          |
| Moderate PM <sub>10</sub> <sup>b</sup>   | 1.04 (0.81-1.34)                          | 0.55                                     | 1.05 (-0.83 - 1.32)                                                       | 0.35                                     | 1.30 (-1.03 - 1.63) | 0.95                                     | 0.92 (0.61-1.39) | 0.26                                     |
| High PM <sub>10</sub> <sup>b</sup>       | 1.00 (0.69-1.45)                          | 0.99                                     | 1.16 (-0.87 - 1.53)                                                       | 0.13                                     | 1.23 (0.93-1.64)    | 0.13                                     | 0.62 (0.37-1.04) | 0.56                                     |
| Low PM <sub>2.5</sub> <sup>c</sup>       | 1                                         |                                          | 1                                                                         |                                          | 1                   |                                          | 1                |                                          |
| Moderate PM <sub>10</sub> <sup>c,e</sup> | 1.12 (0.88-1.43)                          | 0.94                                     | 1.11 (-0.89 - 1.39)                                                       | 0.73                                     | 1.23 (-0.98-1.53)   | 0.73                                     | 1.02 (0.67-1.54) | 0.30                                     |
| High PM <sub>2.5</sub> <sup>c</sup>      | 1.15 (0.79-1.68)                          | 0.13                                     | 1.18 (-0.89 - 1.57)                                                       | 0.05                                     | 1.23 (0.92-1.64)    | 0.04                                     | 0.71 (0.42-1.18) | 0.22                                     |

<sup>a</sup>Adjusted for sex, calendar year, education, smoking, alcohol intake, occupation, neighbourhood mean income, leisure time physical activity, and active commuting

<sup>b</sup>Low PM<sub>10</sub>: <9.6 µg/m<sup>3</sup>; High PM<sub>10</sub>: >9.6 µg/m<sup>3</sup>

<sup>c</sup>Low PM<sub>2.5</sub>: <5.7 µg/m<sup>3</sup>; High PM<sub>2.5</sub>: >5.7 µg/m<sup>3</sup>

<sup>e</sup>Low PM<sub>10</sub>: 7.2 - 9.1 µg/m<sup>3</sup>; Moderate PM<sub>10</sub>: 9.2 - 10.3 µg/m<sup>3</sup>; High PM<sub>10</sub>: 10.4 - 43.0 µg/m<sup>3</sup>

<sup>f</sup>Low PM<sub>2.5</sub>: 4.1 - 5.4 µg/m<sup>3</sup>; Moderate PM<sub>2.5</sub>: 5.5 - 6.1 µg/m<sup>3</sup>; High PM<sub>2.5</sub>: 6.2 - 17.9 µg/m<sup>3</sup>

<sup>d</sup>p-value of the Schoenfeld residual test of proportional hazards

Table 5. Interaction hazard ratios between exercise and air pollution for incident IHD

| Exercise in training clothes | Adjusted <sup>a</sup> interaction hazard ratio                                                             |                                          |                                                                                                            |                                          |
|------------------------------|------------------------------------------------------------------------------------------------------------|------------------------------------------|------------------------------------------------------------------------------------------------------------|------------------------------------------|
|                              | Benefits of exercise comparing moderate <sup>b</sup> high with low PM <sub>10</sub> <sup>b</sup> exposure  |                                          | Benefits of exercise comparing high with low PM <sub>10</sub> <sup>b</sup> particle exposure               |                                          |
|                              | Moderate PM <sub>10</sub> <sup>b</sup>                                                                     | Proportional hazard p-value <sup>d</sup> | High PM <sub>10</sub> <sup>b</sup>                                                                         | Proportional hazard p-value <sup>d</sup> |
| Never                        | 1                                                                                                          |                                          | 1                                                                                                          |                                          |
| ≤ once/week                  | 1.24 (0.91-1.68)                                                                                           | 0.51                                     | 1.07 (0.78-1.45)                                                                                           | 0.99                                     |
| ≥ twice/week                 | 0.88 (0.55-1.39)                                                                                           | 0.58                                     | 0.54 (0.32-0.92)                                                                                           | 0.81                                     |
|                              | Benefits of exercise comparing moderate <sup>b</sup> high with low PM <sub>2.5</sub> <sup>c</sup> exposure |                                          | Benefits of exercise comparing High <sup>b</sup> moderate with low PM <sub>2.5</sub> <sup>c</sup> exposure |                                          |
| Never                        | 1                                                                                                          |                                          | 1                                                                                                          |                                          |
| ≤ once/week                  | 1.11 (0.82-1.50)                                                                                           | 0.97                                     | 1.04 (0.77-1.42)                                                                                           | 0.87                                     |
| ≥ twice/week                 | 0.92 (0.58-1.46)                                                                                           | 0.45                                     | 0.60 (0.35-1.02)                                                                                           | 0.87                                     |

<sup>a</sup>Adjusted for sex, calendar year, education, smoking, alcohol intake, occupation, neighbourhood mean income, leisure time physical activity, and active commuting

<sup>b</sup>Low PM<sub>10</sub>: <9.6 µg/m<sup>3</sup>; High PM<sub>10</sub>: >9.6 µg/m<sup>3</sup>

<sup>c</sup>Low PM<sub>2.5</sub>: <5.7 µg/m<sup>3</sup>; High PM<sub>2.5</sub>: >5.7 µg/m<sup>3</sup>

<sup>e</sup>Low PM<sub>10</sub>: 7.2 - 9.1 µg/m<sup>3</sup>; Moderate PM<sub>10</sub>: 9.2 - 10.3 µg/m<sup>3</sup>; High PM<sub>10</sub>: 10.4 - 43.0 µg/m<sup>3</sup>

<sup>f</sup>Low PM<sub>2.5</sub>: 4.1 - 5.4 µg/m<sup>3</sup>; Moderate PM<sub>2.5</sub>: 5.5 - 6.1 µg/m<sup>3</sup>; High PM<sub>2.5</sub>: 6.2 - 17.9 µg/m<sup>3</sup>

<sup>d</sup>p-value of the Schoenfeld residual test of proportional hazards

|
